1                    **Further perceptions of probability: in defence of trial-by-trial**  
2                    **updating models**

3  
4                    Mattias Forsgren<sup>1</sup>, Peter Juslin<sup>1</sup> and Ronald van den Berg<sup>1,2</sup>

5  
6                    <sup>1</sup>Department of Psychology, Uppsala University, Uppsala, Sweden

7                    <sup>2</sup>Department of Psychology, Stockholm University, Stockholm, Sweden  
8  
9  
10  
11

12                  **Running head:** Further perceptions of probability  
13  
14  
15  
16  
17

18                  **Corresponding author**

19                  Ronald van den Berg

20                  Department of Psychology,

21                  Frescati Hagväg 9A, 11419, Stockholm, Sweden

22                  Tel: +46707929895

23                  Email: ronald.van-den-berg@psychology.su.se  
24

25 **ABSTRACT**

26 Extensive research in the behavioural sciences has addressed people's ability to learn  
27 probabilities of stochastic events, typically assuming them to be stationary (i.e., constant over  
28 time). Only recently have there been attempts to model the cognitive processes whereby people  
29 learn – and track – *non-stationary* probabilities, reviving the old debate on whether learning  
30 occurs trial-by-trial or by occasional shifts between discrete hypotheses. Trial-by-trial updating  
31 models – such as the delta-rule model – have been popular in describing human learning in  
32 various contexts, but it has been argued that they are inadequate for explaining how humans  
33 update beliefs about non-stationary probabilities. Specifically, it has been claimed that these  
34 models cannot account for the discrete, stepwise updating that characterises response patterns  
35 in experiments where participants tracked a non-stationary probability based on observed  
36 outcomes. Here, we demonstrate that the rejection of trial-by-trial models was premature for  
37 two reasons. First, our experimental data suggest that the stepwise behaviour depends on details  
38 of the experimental paradigm. Hence, discreteness in response data does not necessarily imply  
39 discreteness in internal belief updating. Second, previous studies have dismissed trial-by-trial  
40 models mainly based on qualitative arguments rather than quantitative model comparison. To  
41 evaluate the models more rigorously, we performed a likelihood-based model comparison  
42 between stepwise and trial-by-trial updating models. Across eight datasets collected in three  
43 different labs, human behaviour is consistently best described by trial-by-trial updating models.  
44 Our results suggest that trial-by-trial updating plays a prominent role in the cognitive processes  
45 underlying learning of non-stationary probabilities.

46

47 **KEYWORDS**

48 Probability learning; change-point model; delta rule; belief updating; hypothesis testing

## 49 INTRODUCTION

50 When making decisions, we often rely on subjective estimates of the probability that  
51 certain events will occur. Not surprisingly, the issue of how people assess – and should assess  
52 – probabilities has been pivotal to the behavioural sciences since at least the Enlightenment.  
53 How people learn, estimate, and reason with probability has thus been studied extensively,  
54 especially in psychology and behavioural economics. Typically, this has occurred in the context  
55 of assuming *stationary probabilities* in the environment (i.e., probabilities that stay constant  
56 over time). This research shows that people are good at learning stationary probabilities from  
57 experience with relative frequencies (e.g. Edwards, 1961; Estes, 1976; Fiedler, 2000; Peterson  
58 & Beach, 1967), and it has been suggested that frequencies are among the few properties of the  
59 environment that are encoded automatically (Zacks & Hasher, 2002). At the same time, the  
60 research on heuristics-and-biases shows that probability assessments are sometimes also  
61 swayed by subjective (“intentional”) aspects, like prototype-similarity (representativeness) or  
62 ease of retrieval, leading to biased judgements (Kahneman & Frederick, 2005). People also  
63 appear to over-weight extreme probabilities in their decisions when encountering them in  
64 numeric form (Tversky & Kahneman, 1992), but under-weight them when they are learned  
65 inductively from trial-by-trial experience (Hertwig & Erev, 2009). People frequently have  
66 problems with reasoning according to probability theory, leading to phenomena like base-rate  
67 neglect and conjunction fallacies (Kahneman & Frederick, 2005; Tversky & Kahneman, 1983),  
68 at least if they cannot benefit from natural frequency formats (Gigerenzer & Hoffrage, 1995)  
69 that highlight the set-relations between the events (Barbey & Sloman, 2007).

70 However, not all probabilities are stationary, as when, for example, the risks of default in  
71 a mortgage market fluctuate over time or the risk of hurricanes changes with a changing global  
72 climate. A small and mostly recent literature has started to model the cognitive processes by  
73 which people learn – and track – *non-stationary probabilities* (Gallistel, Krishan, Liu, Miller,  
74 & Latham, 2014; Khaw, Stevens, & Woodford, 2017; Ricci & Gallistel, 2017; Robinson, 1964).  
75 Because this research addresses changes in people’s beliefs about probability it has (once again)  
76 highlighted the classical issue of learning by trial-by-trial updating or occasional shifts between  
77 discrete hypotheses (Bruner, Goodnow, & Austin, 1956), with the initial studies reporting  
78 support for processes of explicit hypothesis testing. In this article, we complement the existing  
79 literature in two ways. First, we report an experiment that investigates the robustness of the  
80 stepwise learning patterns that have been taken as evidence for hypothesis testing models over  
81 trial-by-trial updating models in the previous studies. Second, for the first time, we report a

82 formal comparison between the competing models, applied to our own data as well as data from  
83 two other laboratories.

84

## 85 **Tracking Probabilities in Non-Stationary Environments**

86 Several previous studies have started to address how people learn and reason with non-  
87 stationary probabilities. They used tasks in which participants were presented with outcomes  
88 from a Bernoulli distribution that changed over time. Participants were asked to estimate the  
89 hidden Bernoulli parameter, by having them adjust a physical lever (Robinson, 1964) or a slider  
90 on a computer screen (Gallistel et al., 2014; Khaw et al., 2017; Ricci & Gallistel, 2017), with  
91 the option to change their estimate after each new observation.

92 Most versions of this paradigm have asked participants to estimate the proportion of items  
93 of a certain colour in a hypothetical box visualised on a computer screen (Gallistel et al., 2014;  
94 Khaw et al., 2017; Ricci & Gallistel, 2017) (Figure 1A). The participants drag a slider to  
95 indicate a value between 0 and 100 percent to indicate their current estimate, before locking in  
96 their guess, which initiates another draw of an item from the box. The participant may then  
97 choose to revise their estimate or leave it unchanged. This procedure is repeated for many trials.  
98 The data of interest are the realised outcomes, the underlying true probabilities of the outcomes,  
99 and the participant's estimates of these probabilities (Figure 1B). Most participants in previous  
100 studies exhibited stepwise updating behaviour: for long periods they did not adjust their  
101 estimates, at other times more often, but never on every trial.

102 As in many areas of the psychology of learning, there are two different ways of explaining  
103 how people infer probabilities from experience: models with their origin in the associationist  
104 traditions of behaviourism, reinforcement learning, and connectionist models emphasise the  
105 continuous updating of beliefs “trial-by-trial”, while models with their origin in cognitive  
106 psychology emphasise the testing of discrete shifting between hypotheses.

107 A defining feature of trial-by-trial models is that the internal beliefs are updated each time  
108 a new data point is observed. They can be further separated into at least two kinds: delta-rule  
109 and memory-based models. The delta learning rule was introduced by Widrow and Hoff (1960)  
110 as an algorithm for updating the weights of nodes in a connectionist network (see Widrow &  
111 Lehr, 1993, for a review). In psychology, the most famous model based on this rule is the  
112 Rescorla-Wagner model of classical conditioning (Rescorla & Wagner, 1972), but it has also  
113 been adopted in many other domains (Behrens, Woolrich, Walton, & Rushworth, 2007;  
114 Busemeyer & Myung, 1988; Neal & Dayan, 1997; Verguts & Van Opstal, 2014).

115 In the context of probability estimation, delta-rule learning can be implemented as

116

117 
$$\hat{p}_t = (1 - \gamma) \hat{p}_{t-1} + \gamma \delta_{t-1} \quad (1)$$

118 where  $\hat{p}_t$  is the probability estimate at time  $t$ ,  $\hat{p}_{t-1}$  the previous estimate,  $\delta_{t-1}$  the prediction  
119 error at time  $t-1$ , and  $\gamma$  the learning rate. This rule has the advantage of being recursive: it can  
120 operate without access to memories going back any further than the latest observation.

121

122

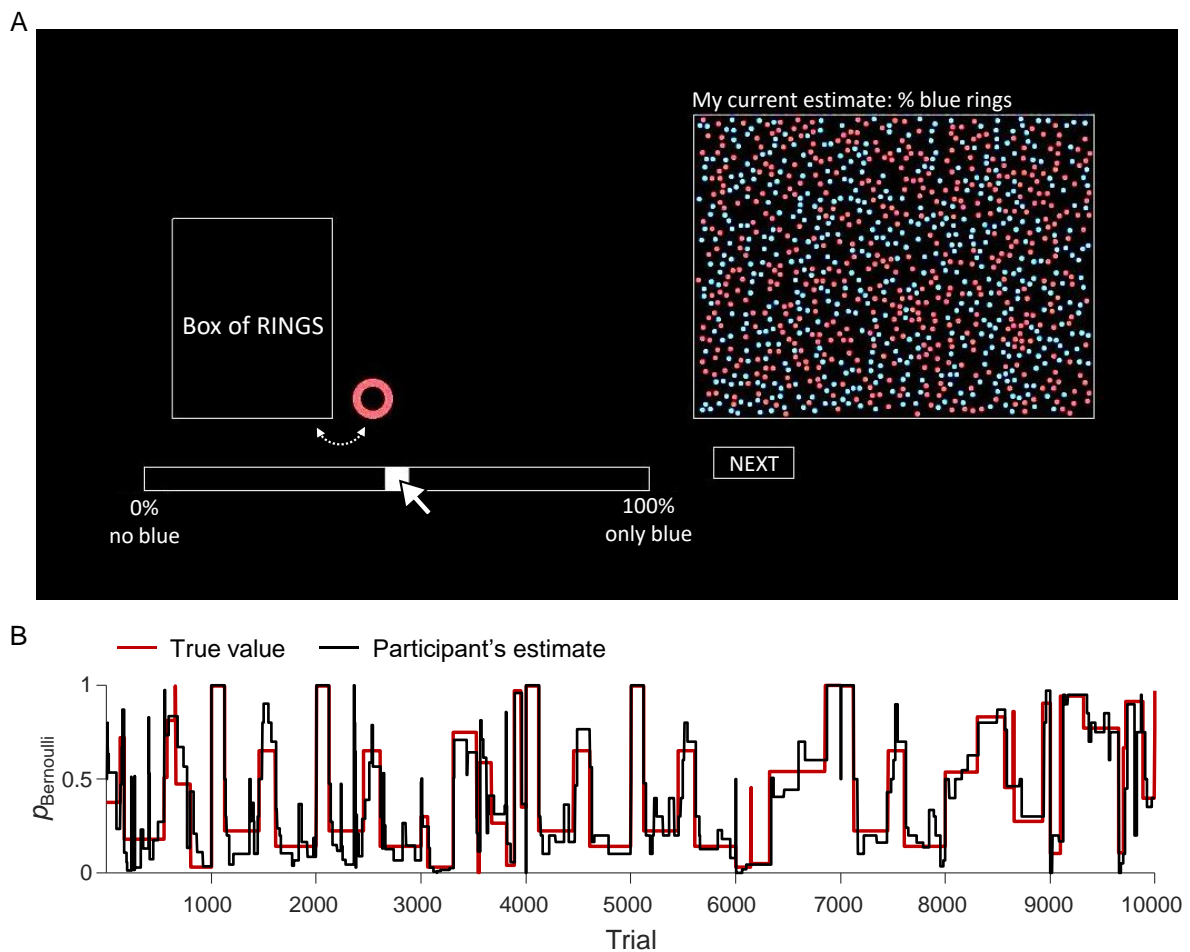

**Figure 1 | Experimental paradigm.** (A) Screenshot of our replication of the visual design of the experiments by Gallistel et al. (2014), Khaw, Stevens and Woodford (2017), and Ricci and Gallistel (2017). All text translated from Swedish to English and slightly enlarged for readability. (B) Example of response data (black) in an experiment where the hidden Bernoulli probability (red) was changing in a stepwise fashion (Participant 1 in Gallistel et al., 2014).

123

124

125 Memory-based models, on the other hand, rely on the memory of previously observed  
126 outcomes. They encode and then retrieve memories of events, often in the form of recency-  
127 constrained samples, to calculate beliefs on-line. These models have been applied to a variety

128 of domains, including perceptual classification (Nosofsky & Palmeri, 1997), decision making  
129 (Lebiere, Stewart, & West, 2009), probability judgments (Costello & Watts, 2014; Juslin &  
130 Persson, 2002; Juslin, Winman, & Hansson, 2007), speech recognition (Gemmeke, Virtanen,  
131 & Hurmalainen, 2011), and consumption decisions (Mullainathan, 2002). Memory-based  
132 models have the advantage that, although they potentially draw on an extensive long-term  
133 memory, they are flexible in the sense that nothing needs to be pre-computed, but the  
134 computations are primarily performed at the time of judgement.

135 By contrast, hypothesis-testing models assume that people learn about the world by  
136 testing between explicit hypotheses about the state of the world based on the confirming or  
137 disconfirming feedback (Brehmer, 1974; Bruner et al., 1956). Hypothesis testing models have  
138 been applied to, for example, research on reasoning (e.g. Klayman & Ha, 1987; Oaksford &  
139 Chater, 1994; Wason & Johnson-Laird, 1970), categorisation (Ashby & Valentin, 2017; Bruner  
140 et al., 1956), and function learning (Brehmer, 1974, 1980). Because a single data point typically  
141 provides little evidence about a hypothesis, these models predict that the beliefs may sometimes  
142 stay unchanged over many trials.

143 According to current theory, trial-by-trial models are unable to account for the stepwise  
144 patterns found in experiments where participants track non-stationary probabilities (Gallistel et  
145 al., 2014; Ricci & Gallistel, 2017) (Figure 1B). Instead, it has been proposed that the stepwise  
146 response pattern is caused by discreteness in how the participants update their beliefs, which  
147 Gallistel et al. (2014) formalised in a hypothesis-testing model that they named the “If it ain’t  
148 broke, don’t fix it” (IIAB) model. According to this model, participants assess whether their  
149 current belief is “broke” after each new observation and only update their belief if the answer  
150 is in the affirmative. The suggestion is that humans do not estimate probabilities directly: they  
151 estimate changes in the hidden Bernoulli parameter and infer probabilities from this.

152

### 153 **Purpose of this study**

154 In the present work, we address three potential weaknesses in previous studies. The first  
155 one is related to the available data. Four previous studies (Gallistel et al., 2014; Khaw et al.,  
156 2017; Ricci & Gallistel, 2017; Robinson, 1964) have reported stepwise response updating in  
157 probability learning experiments with non-stationary probabilities. In three of those  
158 experiments (Gallistel et al., 2014; Khaw et al., 2017; Robinson, 1964), the underlying  
159 probability changed discretely. As noted by Ricci and Gallistel (2017), this is problematic,  
160 because it could mean that the discreteness in response patterns simply reflects the discreteness  
161 in the true underlying function, rather than discreteness in belief updating. Therefore,

162 competing models of probability learning should primarily be tested using data from  
163 experiments in which the Bernoulli parameter changes in a *continuous* fashion. To the best of  
164 our knowledge, the study by Ricci and Gallistel (2017) is the only one so far that has performed  
165 such an experiment. However, for three<sup>1</sup> of their nine participants, the Bernoulli processes  
166 consisted of long periods of no change followed by a quite abrupt change, thus closely  
167 resembling a discretely changing parameter. Altogether, this means that current theories about  
168 human learning of non-stationary probabilities rely heavily on data from only six participants.  
169 The first purpose of the present study is to study the robustness of previous findings by using a  
170 larger participant sample.

171 A second potential weakness of previous studies is that the experimental design may  
172 unintentionally have invited stepwise behaviour. In all previous studies, participants were  
173 informed that the distribution they were inferring would change over the course of the  
174 experiment. If participants had reason to believe that the changes in the probability that they  
175 were tracking were discrete (e.g., because they were told that the box would be replaced “*from*  
176 *time to time*”), then this may have invited stepwise response behaviour. In addition to this, the  
177 bodily effort required to change one’s estimate was in all previous studies substantially greater  
178 than that needed to maintain it. Robinson (1964) had the participants adjust a lever while  
179 Gallistel et al. (2014), Ricci and Gallistel (2017) and Khaw et al. (2017) required them to move  
180 the computer mouse, adjust a slider and move the mouse back again before clicking “Next”. In  
181 contrast, maintaining one’s previous guess merely required pressing the left mouse button once  
182 (Gallistel et al., 2014; Khaw et al., 2017; Ricci & Gallistel, 2017) or no action at all (Robinson,  
183 1964). The asymmetry between the effort required to maintain or change the estimate may have  
184 affected the rate of re-estimations, especially when considering that participants performed  
185 10,000 trials.<sup>2</sup> In Gallistel et al. (2014) and Ricci and Gallistel (2017) a further asymmetry  
186 existed in that a participant could move the slider by clicking right or left of its current position,  
187 which would make it jump a set distance. This made it easier to move it in large steps than in  
188 small ones. The second purpose of our study is to examine whether experimental design choices  
189 regarding instructions and response mode affect the degree of discreteness in response patterns.

190 A third and perhaps the most important weakness of previous work is that competing  
191 models have never been tested against each other using formal quantitative model comparison  
192 methods. Gallistel et al. (2014) compared models mainly based on visual comparisons of

---

<sup>1</sup> Subjects S1, S3, and S4 in the “aperiodic” condition.

<sup>2</sup> We do not know the exact number of trials in Robinson (1964) but each of his subjects performed the task for about 15 hours, which is a substantial amount of time.



193 summary statistics in the participant data with those produced by the models. Khaw et al. (2017)  
194 performed model comparison with the Bayesian Information Criterion (Schwarz, 1978) but  
195 only between trial-by-trial models from the economic literature. The third purpose of this study  
196 is to perform a comprehensive, formal comparison of competing models.

197 To summarise, the main contributions of the present article are as follows. First, we  
198 substantially increase the participant sample of data from learning experiments with  
199 continuously changing probabilities. Second, we investigate whether response effort and  
200 instructions affect the degree of discreteness in people's response patterns. Third, we perform  
201 a rigorous, likelihood-based comparison of hypothesis-testing and trial-by-trial updating  
202 models on all available data, which has not been attempted before.

203

## 204 **EXPERIMENT**

205 Previous studies on human learning and tracking of a non-stationary probabilities  
206 interpreted stepwise response behaviour as evidence that participants update their internal  
207 beliefs in a discrete manner (Gallistel et al., 2014; Ricci & Gallistel, 2017). This interpretation  
208 rests on the assumption that the discrete learning pattern constitutes a fairly stable and robust  
209 phenomenon that derives from the participant's mental shift between discrete hypotheses. In  
210 the present experiment we investigate the extent to which these results are sensitive to  
211 superficial specifics of the task, by experimentally varying two factors that we believe may  
212 affect the rate of re-estimations in the observed response behaviour. The first factor is the  
213 amount of information provided in the instructions to the participants about the non-stationarity  
214 of the probability they are asked to estimate. The second factor is the amount of effort required  
215 to make an update to the response slider.

216

### 217 **Method**

218 *Participants.* Sixty-two participants were recruited using posters advertising the study at  
219 several university campuses in Uppsala. Data from two participants were excluded from the  
220 analysis since they chose to terminate early. The mean age of those who completed the  
221 experiment was 24.7 (SD = 6.3). Forty-seven of these participants identified as female, eleven  
222 as male, and two as other. Participants were rewarded with gift vouchers for a major Swedish  
223 book shop chain (Akademibokhandeln). The total reward value depended on a participant's  
224 task accuracy, with a minimum fixed to the approximate equivalent of USD 11 and the



225 maximum being approximately equivalent to USD 28.<sup>3</sup> Two participants in Condition 1, six in  
226 Condition 2, six in Condition 3 and five in Condition 4 received a signature on a participation  
227 form instead of gift cards. The study was approved by the Regional Ethical Review Board in  
228 Uppsala and conducted according to the Declaration of Helsinki Principles.

229 *Stimulus and task.* We replicated the visual design of the experiment described by  
230 Gallistel et al. (2014) to the best of our ability. The stimulus consisted of a screen showing a  
231 box labelled “Box of RINGS”, a bar with a slider, and a rectangle filled with red and blue dots  
232 (Figure 1A). At the beginning of each trial, a ring would move out of the box and then stay  
233 beside it until the end of the trial. The task of the participant was to estimate the proportion of  
234 blue rings in the box by changing the value indicated by a slider on a bar that was labelled with  
235 “0% - No blue” and “100% - Only blue” on the left and right ends, respectively. Adjusting the  
236 slider caused the proportion of red and blue dots in the square labelled “My current estimate:  
237 % blue rings” to change to reflect the new proportion indicated by the slider position, which  
238 was intended as a visual aid to help participants “see” their currently chosen estimate.

239

#### 240 **Table 1.**

241 *Overview of Experimental Conditions as Combinations of the Response Mode and the*  
242 *Instruction Mode.*

| Condition | Effort mode | Response mode |
|-----------|-------------|---------------|
| 1         | High effort | Uninformed    |
| 2         | High effort | Informed      |
| 3         | Low effort  | Uninformed    |
| 4         | Low effort  | Informed      |

243

244 *Conditions.* The experiment followed a two-by-two factorial design, with “Response  
245 Mode” and “Instruction Mode” as the independent variables (see Table 1). The first variable  
246 had two levels: “Low Effort” and “High Effort”. In the High Effort response mode, participants  
247 revised their estimate by first clicking on the slider and then dragging it to adjust its value.  
248 When they were finished, they would click a “next” button to the right of the slider to initiate  
249 the next trial. In the Low Effort response mode of our experiment, no cursor or “next” button  
250 was visible, and the slider value would change whenever the mouse was moved. Participants  
251 initiated the next trial by a mouse click. The second independent variable also had two levels.

<sup>3</sup> Calculated using 2017 OECD purchasing power parity estimates.

252 In the “Informed” Instruction Mode, participants were explicitly informed about the non-  
253 stationarity of the generative process: they were told that the contents of the box might change  
254 after each draw and that these changes would occur throughout the task. They were also told  
255 that the changes could be fast or slow and that their task was to track the proportion as it  
256 changed. Participants in the “Uninformed” Instruction Mode were not provided with this  
257 information. In all four conditions, the hidden Bernoulli parameter was a sinusoidal with a  
258 minimum of 0, a maximum of 1, and a period of 500. Its value at the very first trial was 0.50.  
259 Condition 2 is almost identical to the design described in Ricci and Gallistel (2017). To the best  
260 of our knowledge, the only difference is that in the original study, the slider would jump a set  
261 distance when the participant clicked to the left or right of it.<sup>4</sup>

262 *Procedure.* At the start of the experiment, participants read a paper detailing that they  
263 were allowed to discontinue their participation at any stage; that the experiment would be  
264 divided into two sessions with a break in between; that the average difference between each of  
265 their guesses and the correct answer would determine their reward; and what the highest  
266 possible reward was. Meanwhile, a Swedish translation of the instructions found in Appendix  
267 A in Gallistel et al. (2014) was displayed on the screen, but without the passages relating to  
268 reporting that the box had changed. In the Low effort conditions, the relevant parts of the  
269 instructions were altered to explain how to answer using the Low Effort response mechanism.  
270 In the Informed conditions, paragraphs were added to explain that the box could be swapped  
271 every time a ring was put back into it, that these changes could be large or small, and that their  
272 task was to estimate the proportion of blue rings in the box and track it as it changed throughout  
273 the task (see the online materials at <https://osf.io/zhv2r/> for English translations of the  
274 instructions). Participants were not told anything about how often they were supposed to make  
275 a change to the slider.

276 When the participant indicated that they had read everything, the experimenter would  
277 approach them to ask if they had understood all that they had read and if they had any further  
278 questions. If asked a question regarding anything not revealed in the instructions, the  
279 experimenter would respond that he was unable to provide that information. Any question  
280 pertaining to practicalities of how to carry out the task would be clarified upon request. The  
281 participants then completed 1,000 trials before a pause screen was displayed, inviting them to  
282 take a break. At their leisure, participants were allowed to commence the second session of

---

<sup>4</sup> This subtlety was not mentioned in the methods of the original study and we only became aware of it when scrutinising the methods of Khaw et al. (2017) who mention it in relation to their own experiment.

283 1,000 trials. The length of the break varied strongly across participants, ranging from 12  
284 seconds to 17 minutes, with a mean of 3 minutes and 6 seconds.

285 After finishing the experiment, the participants filled out post-test questionnaires with  
286 questions concerning their beliefs about the generative function, self-assessed statistics  
287 proficiency, age, gender and education. Finally, they were asked to draw the probability of  
288 drawing a blue ring as a function of trial count into a graph. The questionnaires were  
289 administered on paper and filled in with pen. However, we found little use for the questionnaire  
290 data and did not analyse them.<sup>5</sup>

291 *Analysis.* All statistical analyses are performed using the JASP software package with  
292 default settings (JASP Team, 2019) and R (R Core Team, 2014).

293

## 294 **Results**

295 *Accuracy.* A visual inspection of the mean estimations (Figure 2A) shows that, on  
296 average, the participants tracked the wave-like pattern of the underlying probability reasonably  
297 well in all four conditions of the experiment. However, average accuracy is clearly highest in  
298 the condition where the participants were informed about the non-stationary generative function  
299 and making changes to the slider involved more effort (Figure 2B). We next perform statistical  
300 tests to determine if there is evidence for effects of Information Mode and Effort Mode on the  
301 root mean squared error (RMSE) between the generating probability and the participant's  
302 estimate.

303 Since the data violate the normality assumption of standard ANOVA analyses  
304 (Kolmogorov-Smirnov test,  $p < 10^{-13}$ ), we apply a Kruskal-Wallis and a Friedman test, with the  
305 two between-participant conditions as fixed factors and repeated measurement across blocks of  
306 500 trials each. An initial main effects analysis suggests a main effect of Information Mode  
307 ( $H(1) = 8.919$ ,  $p = 0.003$ ) but not of Effort Mode ( $H(1) = 0.685$ ,  $p = 0.408$ ) or Block of Trials  
308 ( $\chi^2(3) = 1.043$ ,  $p = .791$ ). However, Dunn's post hoc test between the four between-participant  
309 cells indicates that this main effect is secondary to the interaction between Information Mode  
310 and Effort Mode presented in Figure 2C, with significantly lower median RMSE  
311 (approximately 0.13) in the Informed, High Effort condition than in the other three conditions  
312 (median RMSE  $> 0.30$ ;  $p_{\text{holm}} < .020$ ; see Appendix A for details on the Dunn's post hoc test).

313 To get an indication of how well participants performed in an absolute sense, we compare  
314 their accuracy to that of fictive observers who always responds 0.50 (Figure 2C, dashed lines)

---

<sup>5</sup> All questionnaire data are available in the online materials at <https://osf.io/zhv2r/>.

315 or randomly (Figure 2C, dotted lines). It is clear that despite that the average estimates track  
 316 the functions in all conditions in Figure 2A, in three of the conditions the trial-by-trial accuracy  
 317 in terms of RMSE is no better than what is expected from a participant who always responds  
 318 with the probability 0.50. In sum: participants did not improve with training and although the  
 319 average estimates tracked the underlying function, the trial-by-trial accuracy was poor in all  
 320 conditions, except when the participants were informed about the nonstationary process and  
 321 used the more effortful response method.  
 322

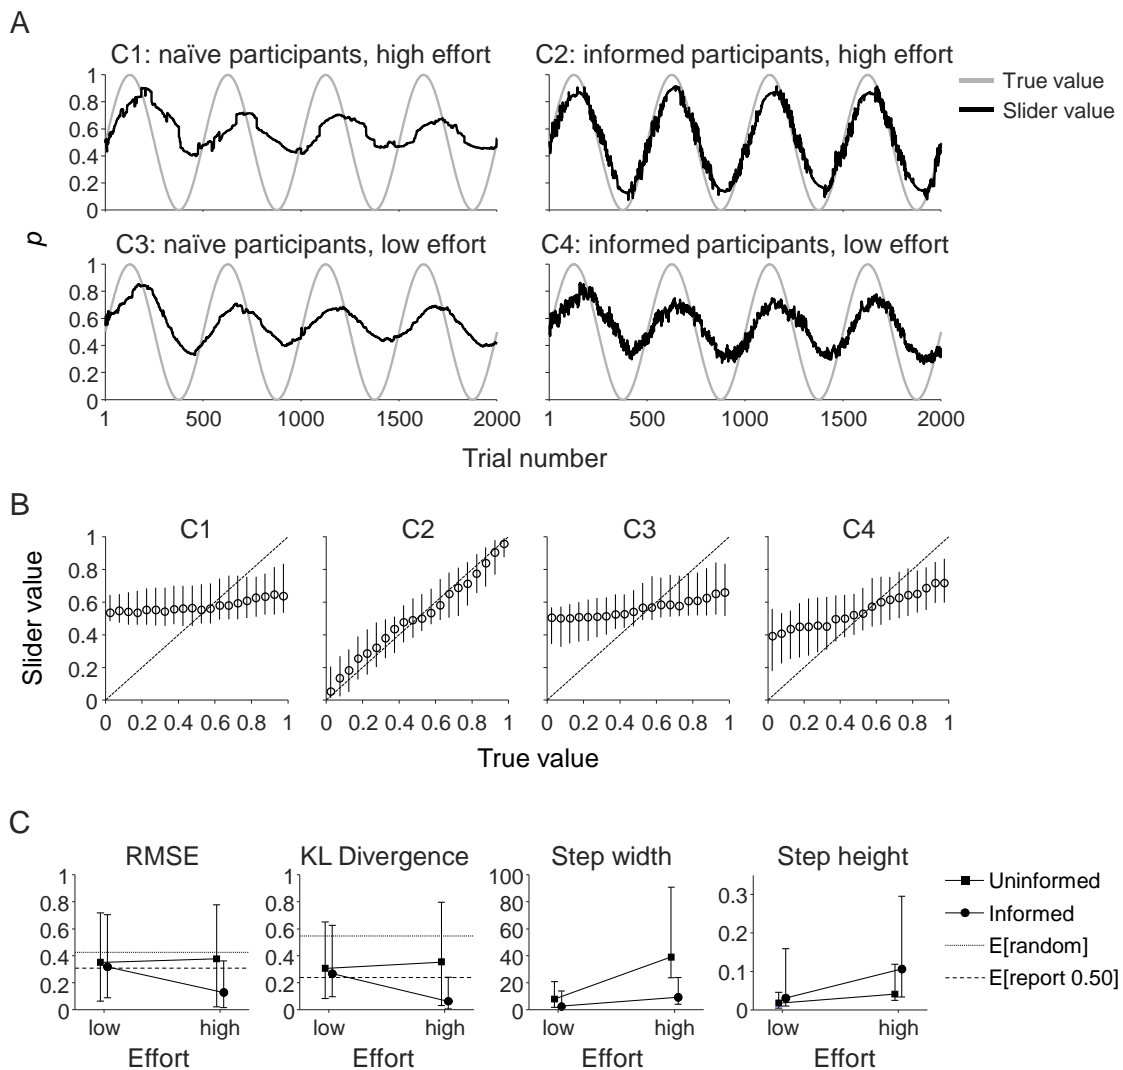

**Figure 2 | Experimental results.** (A) Average response in the four experimental conditions. (B) Median slider value plotted as a function of the true value of the tracked probability. The error bars indicate the interquartile range. (C) Median values of four summary statistics, split by condition. The error bars indicate the 25% and 75% quantiles. The title of each plot specifies the quantity on the y-axis. RMSE stands for root mean square error and KL stands for Kullback-Leibler. The dashed lines indicate the expected value of the summary statistic for an observer who responds randomly and an observer who always responds 0.50.

323

324

325           Following earlier work (Gallistel et al., 2014; Ricci & Gallistel, 2017), we consider the  
326 Kullback-Leibler (KL) divergence as an alternative measure of accuracy. We perform the same  
327 analyses with the KL divergence as the dependent variable and find an initial main effect of  
328 Information Mode ( $H(1) = 8.656, p = 0.003$ ) but not of Effort Mode ( $H(1) = 0.367, p = 0.544$ )  
329 or Block of Trials ( $\chi^2(3) = 2.187, p = 0.534$ ). Dunn’s post hoc test shows that it is secondary to  
330 the interaction between Information Mode and Effort Mode (Figure 2C). The median KL  
331 divergence in the informed high effort condition (approximately 0.064) is significantly lower  
332 than in the other three conditions (median KL divergence  $> 0.267; p_{\text{holm}} \leq .030$ ; see Appendix  
333 A for details on the Dunn’s post hoc test). Hence, the results are consistent between the RMSE  
334 and KL divergence.

335           *Step width.* We next examine whether the experimental manipulations affect the average  
336 number of trials between slider updates, in previous studies referred to as “step width” (Gallistel  
337 et al., 2014; Ricci & Gallistel, 2017). The initial main effects analyses, with the same non-  
338 parametric tests as we applied to the RMSE, suggest significant main effects of Information  
339 Mode ( $H(1) = 9.46, p = 0.002$ ), Effort Mode ( $H(1) = 15.12, p < 0.001$ ) and Block of Trials  
340 ( $\chi^2(3) = 69.33, p < 0.001$ ). The main effect of Block of Trials is an increasing step width, and  
341 thus decreasing rate of re-estimation, with additional training. The main effects of Information  
342 Mode and Effort Mode are qualified by the interaction illustrated in Figure 2C. Dunn’s post  
343 hoc test shows that the median step width is significantly higher in the condition with no  
344 information about the non-stationarity of the process and a High Effort response mode  
345 (approximately 39) as compared to the other three conditions (medians between approximately  
346 2 and 9:  $p_{\text{holm}} < 0.020$ , see Appendix A for details on Dunn’s post hoc test). In sum: with more  
347 training the step width increased somewhat, and it was much larger in the condition without  
348 information about nonstationary and a high-effort response mode. In other words, when the  
349 participants were uninformed that the probability would change over time and the response  
350 required more effort, they were more reluctant to change their estimate.

351           *Step height.* Finally, we test if Information Mode and Effort Mode affected the average  
352 magnitude of the slider adjustments on trials when the estimate was updated, referred to as the  
353 “step height” in Gallistel et al. (2014) and Ricci and Gallistel (2017). Applying the same  
354 statistical tests as above, the results suggest main effects of Information Mode ( $H(1) = 14.633,$   
355  $p < 0.001$ ) and Effort Mode ( $H(1) = 11.363, p < 0.001$ ), but not of Block of Trials ( $\chi^2(3) =$   
356  $6.766, p = 0.080$ ). Dunn’s post hoc test supports both a main effect of Information Mode and  
357 an interaction between Information Mode and Effort Mode, as illustrated in Figure 2C. The  
358 median step height was significantly greater with information about the non-stationarity than

359 without, both with the Low Effort response mode (medians 0.0312 vs. 0.0177;  $p_{\text{holm}} = 0.043$ )  
360 and the High Effort response mode (medians .107 vs. 0.0445;  $p_{\text{holm}} = 0.003$ ), suggesting a main  
361 effect of information regardless of the amount of effort required to update the response. In  
362 addition, the Informed, High Effort condition had a higher median than all of the other three  
363 conditions, suggesting a (catalytic) interaction for this specific condition (see Appendix A for  
364 the full results of Dunn’s post hoc test). In sum, Block of Trials had no effect on the step height,  
365 but information about non-stationarity of the process increased it, especially when the high-  
366 effort response mode was used. Thus, when the participants were told that the underlying  
367 probability could change over time, the changes they made were larger, and this was especially  
368 the case if the response mode required more effort.

369

## 370 Discussion

371 Although the average estimates track the sinusoid function in all conditions (Figure 2A),  
372 in absolute terms the trial-by-trial accuracy was poor in three of the four conditions, in the sense  
373 that the deviation from the true probability on a given trial was no smaller than expected from  
374 a participant who responds with 0.50 on each trial (median RMSE approximately 0.35, see  
375 Figure 2C). In part, of course, this reflects the relative complexity of the task the participants  
376 are faced with. It takes at least a few observations to get a reliable estimate of the underlying  
377 probability. When this probability changes on each trial – as in our experiment – the observer’s  
378 estimate will always lag behind the generating value. Optimal performance would require  
379 participants to infer the abstract function that relates the trial number to the true probability and  
380 to use this function to *predict the true probability on the next trial*. To induce this function from  
381 the “foggy” output of a constantly changing Bernoulli distribution is difficult, especially so if  
382 the observer is provided with only minimum information about the generative process. For this  
383 reason, some previous studies have assessed participant performance by comparing their  
384 responses to those of an optimal observer rather than to the true generating value (Gallistel et  
385 al., 2014; Khaw et al., 2017; Ricci & Gallistel, 2017). These analyses are helpful when  
386 investigating the degree of optimality of participants. However, here we are primarily interested  
387 in the relative performance between groups, for which any measure of accuracy seems suitable.

388 The high accuracy and distinctly stepwise re-estimation behaviour observed in Ricci and  
389 Gallistel (2017) and the other previous studies were only replicated when the participants were  
390 informed about the non-stationarity of the process beforehand and used the more effortful  
391 response mode, which are the conditions under which it has previously been observed. Better  
392 performance with more accurate prior information about the task is obviously no surprise. But



393 this effect interacted with the effort required by the response mode in an interesting way. With  
394 a low effort response mode, there are frequent but small adjustments (median step width of  
395 approximately 5, suggesting about 100 re-estimations per block of 500 trials, of a median size  
396 of .03), and this holds regardless of whether participants are informed about non-stationarity or  
397 not. With the High Effort response mode, the pattern with relatively rare, large re-estimations  
398 only occurred with prior information that the process is non-stationary. The behavioural  
399 differences are indeed large. Participants without information about the non-stationarity and  
400 with the more effortful response mode rarely re-estimate and make rather small adjustments  
401 when they do (median step width of 39 trials, suggesting approximately 13 re-estimations per  
402 block of 500 trials, with a median size of .04). The participants with information about the non-  
403 stationarity and with the more effortful response mode often change their estimates (median  
404 step width of 9 trials suggesting approximately 56 re-estimations per block of 500 trials) and  
405 usually by quite a lot (median step height of .11) The characteristic stepwise patterns of the  
406 predictions of the IIAB-model (Gallistel et al., 2014) were thus observed in only one cell and  
407 appear to arise under specific conditions, suggesting that rare but large re-estimations are not  
408 necessarily intrinsic to the cognitive process.

409 An alternative explanation of the effects of the independent variables on step width and  
410 step height is that they merely reflect the fact that the Low Effort response mode results in an  
411 increase in the number of small, accidental adjustments. When the slider is “stuck” to the mouse  
412 cursor, participants might occasionally produce unintended adjustments. When the slider has to  
413 be dragged, this is less likely to occur. This kind of “shaky hand” error would decrease both the  
414 average step width and step height. There are relatively small negative main effects of having  
415 a low effort response mode on both of those dependent variables. Since we cannot rule out that  
416 the shaky hand effect exists, these should be interpreted with some caution. However, the  
417 substantial interaction between High Effort and Information Mode is not possible to attribute  
418 to such error. If unintentional adjustments as a result of the low effort response mechanism is a  
419 pervasive phenomenon, it should affect the results equally regardless of what information is  
420 provided. We would therefore argue that the main result of our experiment – that the previously  
421 observed stepwise updating arises as a result of particular combinations of circumstances –  
422 holds regardless of whether the Low Effort response mode increases the number of accidental  
423 adjustments.

424 A tentative interpretation of the results is that people spontaneously tend to be “myopic”,  
425 only considering small samples of the most recent observations, which they project onto the  
426 next trial as an estimate of the probability. This estimate can, in principle, change from trial to



427 trial, as is consistent with the small and frequent adjustments produced by the participants in  
428 several conditions, and their overt expression of the estimate is affected by the effort required  
429 to produce the response, as is consistent with the significant effects of Response Mode.  
430 Intriguingly, the effortful response mode seems to have invited participants to consider larger  
431 sample sizes, allowing them to better track changes in the underlying probability.

432 To conclude, a key implication of these results is that the discreteness of the response  
433 data seems sensitive to external factors, which calls into question whether it should be thought  
434 of as inherent to human probability inference as has been done in previous literature. Instead,  
435 the pattern may reflect adaptations to the particulars of the task at hand. In other words, it is  
436 possible that the internal belief updating is continuous and only the slider adjustments occur  
437 discretely.

438

## 439 **MODELLING**

440 According to the currently leading theory, human behaviour in probability estimation  
441 tasks is consistent with hypothesis-testing models and cannot be explained by any trial-by-trial  
442 updating model (Gallistel et al., 2014; Ricci & Gallistel, 2017). Above, we presented  
443 experimental evidence that calls the first part of this claim into question; the remainder of this  
444 paper is dedicated to evaluating the plausibility of the second part, by using formal model  
445 comparison techniques. Our approach makes four important methodological improvements on  
446 previous studies. First, instead of setting parameters manually, we use maximum-likelihood  
447 fitting to determine parameter values. Second, instead of fitting models to summary statistics,  
448 we fit them to the raw data. This way, we use all available information and avoid having to  
449 decide which statistics to look at and how to weight them against each other. Third, instead of  
450 evaluating goodness of fit through visual inspection of plots, we use formal model comparison  
451 techniques. Fourth, instead of evaluating the models only against our own data, we also include  
452 all available data from other studies in our analyses.

453

### 454 **Factorial model design**

455 When models differ from each other in multiple ways, it is hard to identify which factor  
456 explains the success of one model over another. To circumvent such identifiability problems,  
457 we apply a method known as *factorial model comparison* (van den Berg, Awh, & Ma, 2014).  
458 Just as in factorial experimental designs and factorial ANOVAs, this means that we pair every  
459 choice in one factor with every possible choice in the other factors. The goal is not only to  
460 identify the model that best captures the underlying process, but also to quantify evidence for

461 each factor level, much as an ANOVA quantifies the evidence for each of the main effects. We  
 462 deconstruct the models that we consider here into two factors: the updating mechanism and the  
 463 threshold mechanism. For convenience, Table 2 provides an overview of the most important  
 464 mathematical terms and symbols appearing in the model specifications.

465

466 **Table 2.** *Overview of Mathematical Terms Used in the Model Specifications.*

| Term                          | Description                                                                                                                                                                                          |
|-------------------------------|------------------------------------------------------------------------------------------------------------------------------------------------------------------------------------------------------|
| $p_{\text{true}}$             | True value of the Bernoulli parameter that participants are trying to estimate ( $p_g$ in Gallistel et al., 2014)                                                                                    |
| $p_{\text{slider}}$           | The current estimate of $p_{\text{true}}$ as represented by the slider ( $\hat{p}_g$ in Gallistel et al., 2014)                                                                                      |
| $p_{\text{observed}}$         | The current estimate of $p_{\text{true}}$ based on the (latest) outcome observations ( $p_o$ in Gallistel et al., 2014)                                                                              |
| $O_t$                         | The observed outcome (0 or 1) on trial $t$                                                                                                                                                           |
| $E$                           | Discrepancy between $p_{\text{slider}}$ and $p_{\text{observed}}$ , measured as the absolute difference or KL divergence (comparable to $E$ in Gallistel et al., 2014)                               |
| $N$                           | Number of trials since the last slider update took place                                                                                                                                             |
| $T_1$                         | Threshold on $\varepsilon$ , determining whether a slider update is performed ( $T_1$ in Gallistel et al., 2014); this parameter appears in all models                                               |
| $T_2$                         | Threshold on the posterior odds of a change, determining whether the observer believes that a change point was missed ( $T_2$ in Gallistel et al., 2014); this parameter only appears in IIAB models |
| $A$                           | Learning rate; this parameter only appears in delta-rule models                                                                                                                                      |
| $A$                           | Memory weight; this parameter only appears in memory-based averaging models                                                                                                                          |
| $\sigma_{\text{unexplained}}$ | Standard deviation of the normally distributed error term, which takes care of unexplained variance                                                                                                  |
| $\mu_{T_1}, \sigma_{T_1}$     | Mean and standard deviation of the distribution of $T_1$                                                                                                                                             |

467

468

469 *Factor 1: Updating mechanism.* This factor determines how and when the observer  
 470 updates their belief about the hidden Bernoulli probability,  $p_{\text{true}}$ . We consider three options: the  
 471 IIAB mechanism, a delta-rule mechanism, and a memory-based averaging mechanism. The  
 472 essence of the IIAB mechanism (Gallistel et al., 2014) is that it maintains a list of “change  
 473 points” that is updated through hypothesis testing. The change points summarise at which  
 474 earlier time points there was, according to the model, a change in  $p_{\text{true}}$  and how large each

475 supposed change was. After making a new observation, the mechanism tests the hypothesis that  
476 “something is broke”. It does so by computing how much the currently held belief about  $p_{\text{true}}$  –  
477 as encoded in the most recently registered change point – deviates from the estimate based on  
478 all observations since the last change point. When this discrepancy exceeds a threshold  $T_1$ , it is  
479 concluded that “something is broke” and that it “needs fixing.” The updating mechanism then  
480 proceeds to a second stage, where three further hypotheses are tested about what might be  
481 wrong: the last registered change point was incorrect and must be expunged, it was at the wrong  
482 point and should be moved, or there has been a new change point after the last one encoded,  
483 which now needs to be registered. Once a decision has been made on this, the mechanism  
484 updates the list of change points accordingly and adjusts the slider value,  $p_{\text{slider}}$ , to make it  
485 consistent with what is now the latest estimated change point. For a detailed description of the  
486 mechanism, see Gallistel et al. (2014). Importantly, since it can take many observations before  
487 it is detected that “something is broke”, slider updates in this type of model tend to happen in a  
488 discrete fashion.

489 The second updating mechanism that we consider is the delta rule, which we abbreviate  
490 as “Delta”. Unlike the IIAB mechanism, the delta rule has no notion of hypothesis testing and,  
491 therefore, has no threshold on its belief updating. Instead, it updates its estimate of the hidden  
492 Bernoulli parameter after each new observation. It does so by computing a weighted average  
493 of the previous estimate,  $p_{\text{observed},t-1}$ , and latest observation,  $O_t$ , through

494 
$$p_{\text{observed},t} = (1 - \lambda) p_{\text{observed},t-1} + \lambda O_t, \quad (2)$$

495 where parameter  $\lambda$  is the learning rate. Another difference to the IIAB mechanism is that since  
496 an update is made on each trial, the magnitude of the updates will often be very small. However,  
497 considering that it is effortful in both time and energy to adjust the slider value, it seems  
498 reasonable to assume that observers only do so when the discrepancy between slider and belief  
499 has grown sufficiently large. Therefore, we impose a response threshold  $T_1$  on this discrepancy,  
500 such that a slider update is only made when it is considered to be worth the effort.

501 The third and final updating mechanism that we consider is a memory-based weighted  
502 average, which we abbreviate as “M-Avg”. In this mechanism, the probability estimate is  
503 computed as

504 
$$p_{\text{observed},t} = \sum_{i=1}^t w_i O_i, \quad (3)$$

505 where the weights decrease exponentially in history,  $w_i = \frac{\alpha^{t-i}}{\sum_{j=1}^t \alpha^{t-j}}$ . Parameter  $\alpha$  is constrained  
506 to the range [0,1] and can be thought of as a history weight: the larger its value, the more weight  
507 is given to observations further back in time. If  $\alpha = 0$ , then  $p_{\text{observed}}$  is equal to the last  
508 observation; if  $\alpha = 1$ , then  $p_{\text{observed}}$  equals a plain average of all observations; if  $0 < \alpha < 1$ , then  
509  $p_{\text{observed}}$  is a weighted average of all observations, with higher weight given to more recent  
510 observations. Just as in the Delta mechanism, we include a response threshold such that slider  
511 updates are made only when the discrepancy between belief and current slider value is  
512 sufficiently large.

513 *Factor 2: Threshold mechanism.* All three updating mechanisms described above involve  
514 a threshold, denoted as  $T_1$ : the IIAB mechanism has an “is it broke” threshold that prevents  
515 hypothesis updating when there is too little evidence that something is wrong and the other two  
516 updating mechanisms have a response threshold that prevents slider updating when it is not  
517 worth the effort. In the original formulation of the IIAB model, the “is it broke” discrepancy is  
518 measured as KL divergence,  $\varepsilon = \text{KL}(p_{\text{observed}} \parallel p_{\text{slider}}) \times n$ , where  $p_{\text{observed}}$  is an estimate of  $p_{\text{blue}}$   
519 based on the outcomes observed since the last change point,  $p_{\text{slider}}$  is the currently held belief  
520 and  $n$  is the number of trials since the last update. For the response threshold in the other two  
521 mechanisms, however, a more obvious measure of discrepancy is the absolute difference,  
522  $\varepsilon = |p_{\text{observed}} - p_{\text{slider}}|$ . This is indeed what Gallistel et al. (2014) used in their implementations of  
523 delta-rule models. These two proposals differ from each other in two ways: the discrepancy is  
524 either measured as KL divergence ( $\varepsilon = \text{KL}(\Delta)$ ) or as an absolute difference ( $\varepsilon = |\Delta|$ ) and it is either  
525 multiplied by  $n$  ( $\varepsilon = \text{KL}(\Delta) \times n$ ;  $\varepsilon = |\Delta| \times n$ ) or not. To dissociate the effects of threshold choice from  
526 effects of updating mechanism on goodness of fit, we cross these options factorially, which  
527 gives rise to four different threshold mechanisms. Combining each updating mechanism with  
528 each threshold mechanism results in a total of 12 models (see Table 3).

529 *Threshold variability.* Since cognitive processes are generally noisy, it seems plausible  
530 that threshold  $T_1$  varies from trial to trial. Therefore, following the proposal by Gallistel et al.  
531 (2014), we draw the value of  $T_1$  on each trial from a normal distribution with a mean  $\mu_{T1}$  and  
532 standard deviation  $\sigma_{T1}$ , both of which are fitted as free parameters.

533

534 **Table 3.** *Overview of Factors and Factor Levels in the Factorial Model Design. The First*  
535 *Factor Specifies the Updating Mechanism, of Which Three are Considered: IIAB, the Delta*  
536 *Dule, and Memory-based Averaging. The Second Factor Specifies the Threshold Mechanism,*

537 *of Which Four are Considered: Absolute Error, Absolute Error Multiplied by the Number of*  
 538 *Trials Since the Last Slider Update, KL Divergence, and KL Divergence Multiplied by the*  
 539 *Number of Trials Since the Last Slider Update.*

| Factor name         | Level name                                                                  | Level-related parameters |
|---------------------|-----------------------------------------------------------------------------|--------------------------|
| Updating mechanism  | IIAB                                                                        | $T_2$                    |
|                     | Delta                                                                       | $\lambda$                |
|                     | M-Avg                                                                       | $\alpha$                 |
| Threshold mechanism | $\varepsilon =  p_{\text{observed}} - p_{\text{slider}} $                   | $\mu_{T1}, \sigma_{T1}$  |
|                     | $\varepsilon =  p_{\text{observed}} - p_{\text{slider}} n$                  | $\mu_{T1}, \sigma_{T1}$  |
|                     | $\varepsilon = \text{KL}(p_{\text{observed}} \parallel p_{\text{slider}})$  | $\mu_{T1}, \sigma_{T1}$  |
|                     | $\varepsilon = \text{KL}(p_{\text{observed}} \parallel p_{\text{slider}})n$ | $\mu_{T1}, \sigma_{T1}$  |

540

#### 541 **Model fitting methods**

542 Due to the existence of latent variables in the IIAB models and the presence of trial  
 543 dependencies, the proper likelihood function is intractable for some of the models. Therefore,  
 544 we use a simplified, “custom” likelihood function for model fitting (Appendix B). We use the  
 545 Bayesian Adaptive Direct Search (BADs) method (Acerbi & Ma, 2017) to find the parameters  
 546 that maximise this function. In order to reduce the risk of terminating in local maxima, we run  
 547 BADs thirty times with different initial parameter values. Prior to each run, we evaluate the  
 548 likelihood function for five hundred randomly drawn parameter vectors and choose the vector  
 549 that gives the highest outcome as the initial parameter vector for BADs. Results from a model  
 550 recovery analysis confirm that these methods allow for reliable model comparison (see  
 551 Appendix C).

552

#### 553 **Benchmark dataset**

554 To get the most out of the model comparison, we fit the models to both our own data and  
 555 the data from three previous studies, which were made available to us by the respective authors  
 556 (Gallistel et al., 2014; Khaw et al., 2017; Ricci & Gallistel, 2017; see Table 4).<sup>6</sup> The number of  
 557 trials per participant varied from 2,000 to 10,000 across experiments, with a grand total of

<sup>6</sup> There is one other study using the same paradigm (Robinson, 1964), but it has no preserved record of the data known to us.

558 408,000 trials. To the best of our knowledge, all experiments were conducted in sessions of  
 559 1,000 trials each, with breaks between consecutive sessions. Because of these breaks, we  
 560 suspect that parameter values might not be stable across sessions. Therefore, we fit the models  
 561 separately to each session, of which we have 408 in total (Table 4). All data are available online  
 562 as a benchmark data set at <https://osf.io/zhv2r/>.

563

564 **Table 4.** *Overview of Datasets Used to Evaluate the Models.*

| Exp. ID | Study                    | Underlying function      | Number of participants | Number of trials per participant | Number of trials per session | Total number of sessions |
|---------|--------------------------|--------------------------|------------------------|----------------------------------|------------------------------|--------------------------|
| E1      | Gallistel et al. (2014)  | Stepwise                 | 10                     | 10,000                           | 1,000                        | 100                      |
| E2      | Ricci & Gallistel (2017) | Continuous (aperiodic)   | 5                      | 10,000                           | 1,000                        | 50                       |
| E3      | Ricci & Gallistel (2017) | Continuous (periodic)    | 3 <sup>7</sup>         | 9,000 (2x)<br>10,000 (1x)        | 1,000                        | 28                       |
| E4      | Khaw et al. (2017)       | Stepwise                 | 11                     | 10,000                           | 1,000                        | 110                      |
| E5      | Present study            | Continuous (Condition 1) | 15                     | 2,000                            | 1,000                        | 30                       |
| E6      | Present study            | Continuous (Condition 2) | 15                     | 2,000                            | 1,000                        | 30                       |
| E7      | Present study            | Continuous (Condition 3) | 15                     | 2,000                            | 1,000                        | 30                       |
| E8      | Present study            | Continuous (Condition 4) | 15                     | 2,000                            | 1,000                        | 30                       |

565

## 566 **Model comparison**

567 We fit the twelve models (Table 3) separately to each of the 408 datasets (Table 4) for a  
 568 total of 4,896 fits. In doing so, we include only the first 750 trials from each dataset, so that we  
 569 can use the remaining 250 trials for cross validation.

570 Model comparison based on AIC values shows a large heterogeneity between participants  
 571 (Figure 3A, left): there is not a single model that provides a good fit to all datasets and every  
 572 model seems to perform well on at least one dataset. Despite this heterogeneity, it is clear that

<sup>7</sup> This experiment had 4 subjects, but we suspect that for one of them the responses were flipped between two sessions. We excluded this subject from our analyses.

573 some models perform better overall than others. In particular, the IIAB models generally fit  
 574 worse than the Delta and M-Avg models. When averaging the relative AIC values across  
 575 datasets (Figure 3A, right), the most successful model is the one with a memory-based updating  
 576 mechanism and a threshold mechanism based on the absolute difference (M-Avg with  $\epsilon=|\Delta|$ ).  
 577 All other models have an average AIC value of at least 50 points larger, which would even  
 578 under a very conservative criterion be reason to reject them all. However, given the  
 579 heterogeneity at the individual level, it seems unwarranted to rule out individual models at this  
 580 stage.

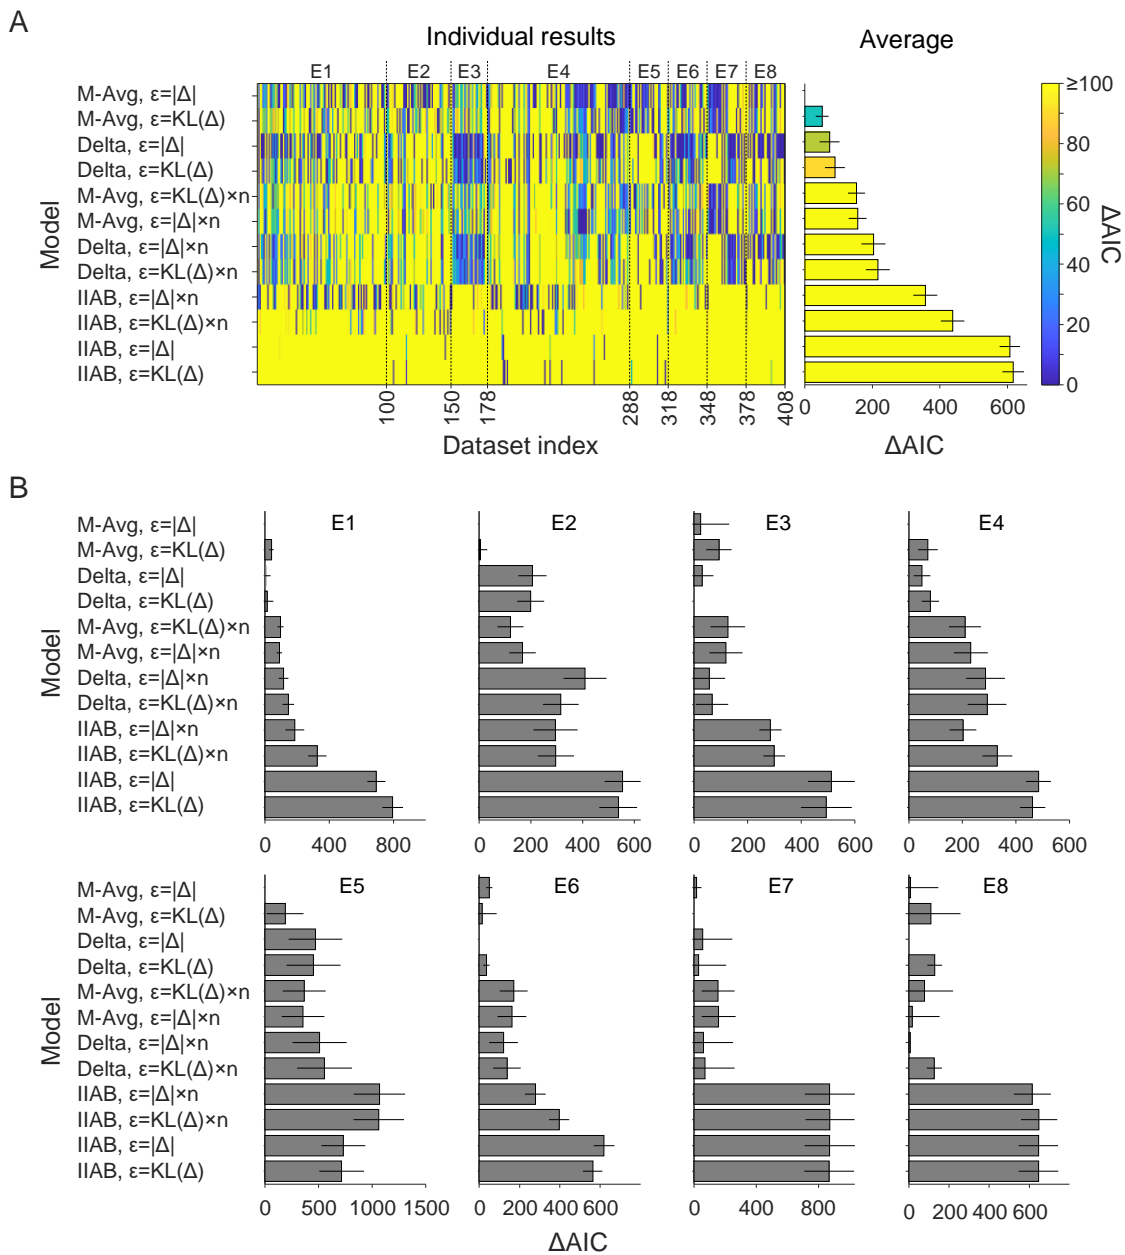

**Figure 3 | Model comparison based on AIC scores.** (A) AIC-based comparison of the twelve main models fitted to 408 datasets. Left: AIC values relative to the best-fitting model for individual datasets. Right: Relative AIC values averaged across all datasets. (B) Model comparison split by experiment, with the models ordered in the same way as in panel A.

581



582 Instead of looking at individual models, it may be more informative to look at the success  
 583 of each factor level. To this end, we compute the *log factor likelihood* as proposed by Shen and  
 584 Ma (2019) to quantify the evidence for each factor level (Figure 4). Consistently across  
 585 experiments, the results reveal strong evidence against the IIAB updating mechanism, while  
 586 the two trial-by-trial mechanisms perform approximately equally well in most experiments. In  
 587 terms of threshold mechanisms, we observe that there is evidence against models that  
 588 incorporate the number of trials since the last slider update, while there is approximately equal  
 589 evidence for mechanisms based on the absolute difference and mechanisms based on KL  
 590 divergence.

591 While AIC is widely used as a measure of *fit*, it is not necessarily a good measure of  
 592 *prediction* due to possible overfit. Therefore, we next compare models based on the log  
 593 likelihood of the last 250 trials of each session, which were not included during model fitting.  
 594 The results of this cross-validation analysis (Appendix D) show a pattern that is largely similar  
 595 to the AIC-based results: there is large heterogeneity at the level of individual datasets, models  
 596 with an IIAB updating mechanism generally perform poorly, and there is no strong evidence in  
 597 favour or against specific threshold mechanisms. However, the evidence is now more even  
 598 between the Delta and M-Avg mechanisms and it is harder to distinguish between the threshold  
 599 mechanisms.

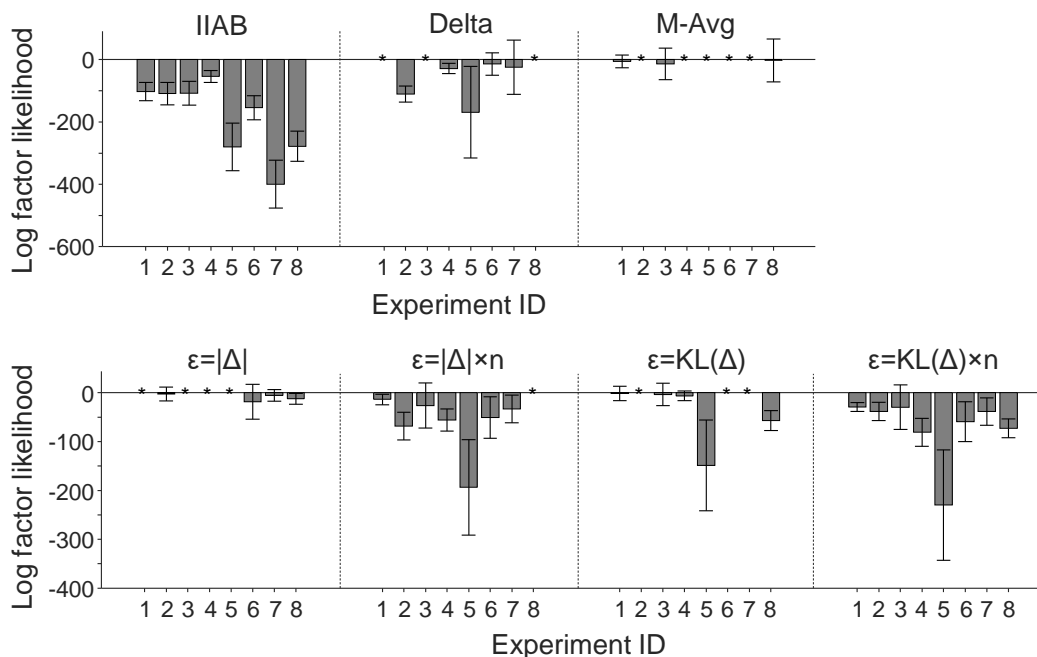

**Figure 4 | Factor level comparison.** Top: Evidence for each level in the first factor relative to the most successful level, combined across all models. Bottom: Evidence for each level in the second factor relative to the most successful level, combined across all models. The most successful levels in each experiment are indicated by asterisks.

## 601 **Model fits**

602 The model comparison results provide insight into how well the models perform in  
603 relation to each other. However, those results would be of little value if all models were  
604 extremely poor descriptions of the data. Visual inspection of the fits indicates that the best  
605 model overall (M-Avg with  $\varepsilon=|\Delta|$ ) generally does a good job in describing the participant  
606 responses (see Figure 5 for a few examples; an overview of all fits can be found online at  
607 <https://osf.io/zhv2r/>). Across all 408 datasets, the average RMSE between the maximum-  
608 likelihood fit of this model and the participant data is  $0.139 \pm 0.004$ . Consistent with the results  
609 of the formal model comparison, we find that the RMSE is higher for the best-fitting Delta  
610 model ( $0.142 \pm 0.004$ ) and the best-fitting IIAB model ( $0.153 \pm 0.004$ ).

611

## 612 **Parameter estimates**

613 An overview of the maximum-likelihood parameter estimates for each model is found in  
614 Appendix E. The estimate of  $\sigma_{\text{unexplained}}$  is on average smaller in the M-Avg and Delta models  
615 than in the IIAB models, suggesting that the latter kind of model leaves more variance  
616 unexplained than the former two, which is consistent with the model comparison results. In the  
617 best-fitting model (M-Avg with  $\varepsilon=|\Delta|$ ), the median value of this parameter is  $5.64 \times 10^{-2}$ . This is  
618 rather small in relation to the response scale (0 to 1), which corroborates our earlier conclusion  
619 that the model provides a reasonably good account of the data. For parameters  $\mu_{T1}$  and  $\sigma_{T1}$  we  
620 find median values equal to 0.470 and 0.207, respectively. These values indicate a relatively  
621 high response threshold with quite a high degree of trial-by-trial variability. We speculate that  
622 the variance captured by these parameters also includes other sources of variability in response  
623 behaviour (e.g., noise in the calculation of  $\varepsilon$  and variability in the applied learning rate or  
624 memory weight) which are not specified in the models.

625 Finally, we estimate how much outcome history the winning M-Avg takes into account  
626 in its trial-by-trial estimates of  $p_{\text{true}}$ . The memory weight in this model drops exponentially with  
627 history length, with a rate that is determined by parameter  $\alpha$ . We quantify the history length as  
628 the number of trials that cover 95% of the total weight mass. Based on the maximum-likelihood  
629 estimates of  $\alpha$ , we find a median length of 33 trials (25% quantile: 19 trials; 75% quantile: 97  
630 trials).

631

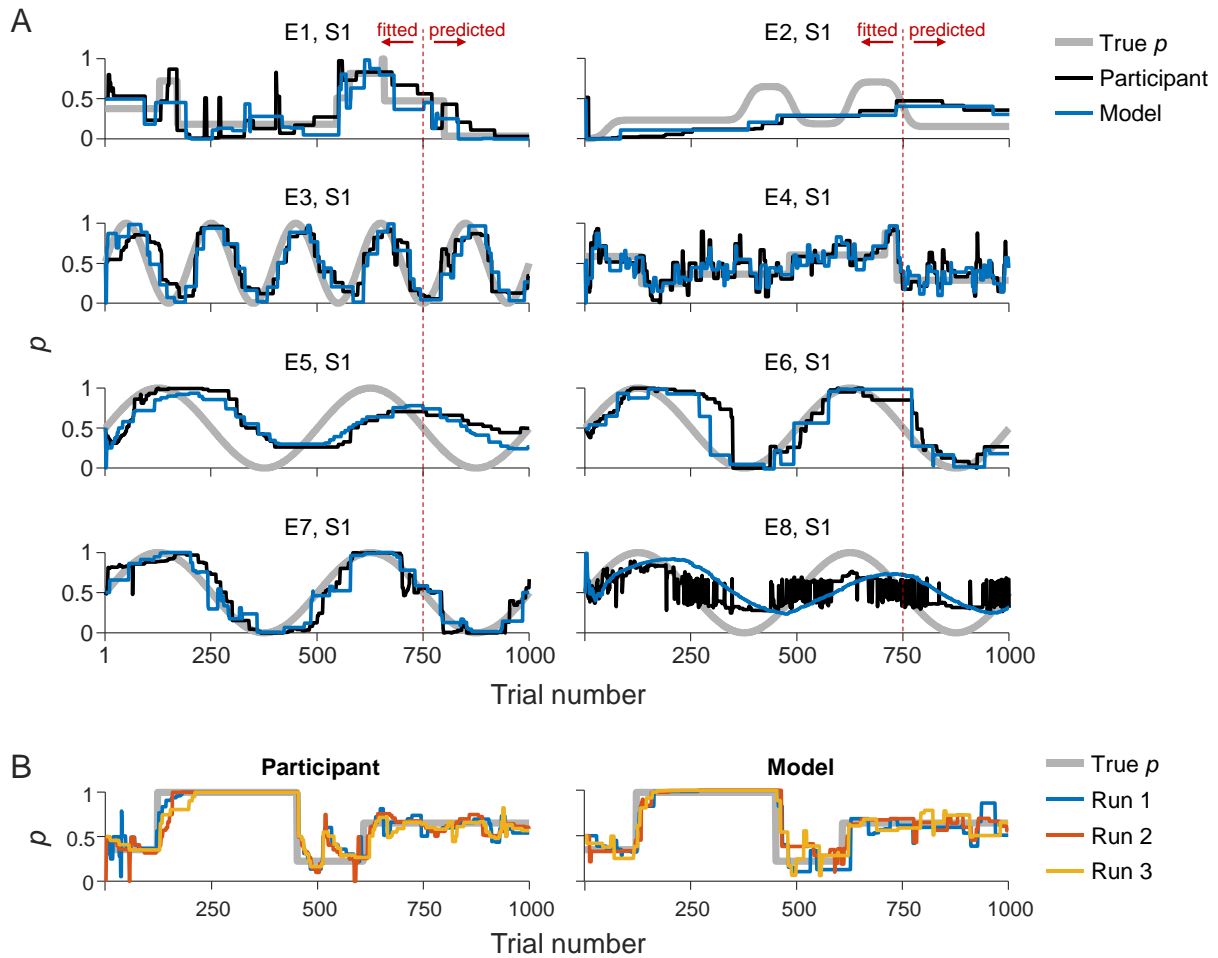

**Figure 5 | Fits of the best-fitting model (M-Avg with  $\epsilon=|\Delta|$ ) to the raw response data.** (A) Data and model fit for the first session of the first participant in each of the eight experiments. The model fit was computed using a forward simulation using the maximum-likelihood parameter estimates. (B) Left: Responses of Participant 1 in experiment E4 to sessions 2 (blue), 6 (red), and 9 (yellow). The value of  $p_{\text{Bernoulli}}$  (grey) as well as the observed outcomes presented to the participant were identical in those sessions. Right: three runs of the model with parameters fixed to the maximum likelihood estimates obtained from fitting the data of session 2. Note that the variability across runs is of similar magnitude between participant and model.

632

633

### 634 Model comparison with fixed thresholds

635

636

637

638

639

640

641

All models that we have tested so far had a variable threshold. We next address two questions regarding this variability. First, how much do the fits suffer if the variable threshold is replaced by a fixed one? Second, do the conclusions that we draw from the model comparison depend on the existence of threshold variability? To answer these questions, we re-fit the twelve models with  $\sigma_{T1}$  fixed to 0. While the AIC value worsens for each of the twelve models – by a minimum of  $728 \pm 38$  points – the model order is near-identical to the order we found with the models with variable thresholds (Figure 6A). Hence, while the assumption of variability in

642 thresholds contributes strongly to the success of all tested models, our main conclusions do not  
 643 critically depend on it.  
 644

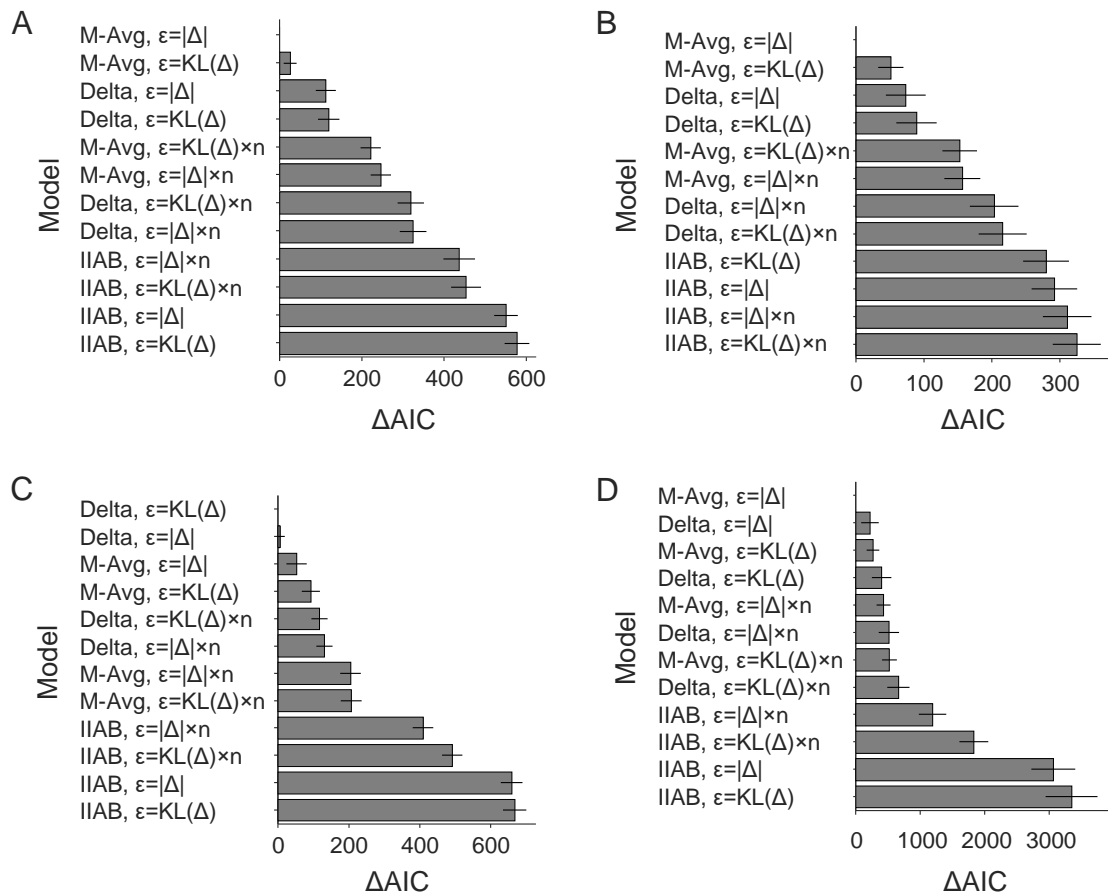

**Figure 6 | Results from additional model comparisons.** (A) Model comparison results after removing threshold variability. (B) Model comparison results after adding a response threshold to the IIAB models. (C) Model comparison results after adding a second kernel to the Delta models. (D) Model comparison results based on fitting models to full datasets instead of sessions.

645

646

### 647 **IIAB with a response threshold**

648 The IIAB models have a threshold at the belief updating stage, while the trial-by-trial  
 649 updating models have a threshold at the response stage. This creates a potential interpretation  
 650 problem regarding the model comparison results: is the relatively poor performance of the IIAB  
 651 models due to its belief updating mechanism or due to it lacking a threshold at the response  
 652 stage? Or, put differently: can the IIAB model be salvaged by adding a response threshold? To  
 653 answer this question, we add a response threshold to the IIAB models and fit them again to all  
 654 408 datasets. We find that this modification improves the average AIC values of the IIAB  
 655 models by  $200 \pm 6$  points. However, despite this substantial improvement, the models still  
 656 perform poorly compared to the trial-by-trial models (Figure 6B).

## 657 **Two-kernel delta-rule model**

658 Under conditions where there are large and infrequent changes, as in much of the  
659 experimental data considered in this study, the standard versions of the delta-rule and memory-  
660 averaging models face a problem. If a lot of weight is put on the most recent history (by having  
661 a high learning rate in the delta model or a low memory weight in the memory-averaging  
662 model), the model will quickly catch on to changes but exhibit excessive volatility during the  
663 long periods where the true probability is unchanged. If, on the other hand, it is only given a  
664 little weight, excessive volatility will be avoided but the model will be slow to catch on to  
665 sudden changes. As a potential solution, Gallistel et al. (2014) considered a two-kernel variant  
666 that keeps track of two running averages. One kernel has a fast learning rate and the other a  
667 slow one. When there is a sudden change, the discrepancy between the two estimates is large,  
668 which is used as a signal that there has been a change and that the fast kernel should be trusted.  
669 After some observations, the slow kernel will catch up and the discrepancy will decrease,  
670 signalling that the fast kernel is no longer relevant. The model will then revert to reporting the  
671 slow kernel's estimate. A similar extension is conceivable for the memory-averaging model,  
672 by using two memory weights, but we limit our present analysis to the Delta model.

673 We next test whether a two-kernel delta-rule model is a serious contender to the other  
674 models we have considered so far. The model keeps two estimates of the Bernoulli probability,  
675  $p_{\text{slow},t} = (1 - \lambda_{\text{slow}})p_{\text{slow},t-1} + \lambda_{\text{slow}}O_t$  and  $p_{\text{fast},t} = (1 - \lambda_{\text{fast}})p_{\text{fast},t-1} + \lambda_{\text{fast}}O_t$ . On trials where the absolute  
676 difference between the two estimates is larger than a threshold  $\Delta_c$ , the model takes  $p_{\text{fast}}$  as its  
677 estimate of the Bernoulli probability; otherwise it uses  $p_{\text{slow}}$  as its estimate. The model thus has  
678 two additional parameters compared to the standard delta-rule model tested above. As in the  
679 main analysis, we combine this updating mechanism with all four thresholding mechanisms  
680 (Table 3). We find that across all 1,632 fits, the additional kernel improves the AIC value of  
681 the delta-rule models on average by  $133 \pm 5$  points. In terms of model comparison, the two-  
682 kernel delta-rule model with  $\varepsilon = \text{KL}(\Delta)$  outperforms all other tested models (Figure 6C).

683

## 684 **Fits to full datasets**

685 In the analyses presented above, we have been fitting models to sessions of 1,000 trials  
686 each to allow for the possibility that parameters can vary between sessions. To verify that our  
687 conclusions do not critically depend on this choice, we next fit the models to the full datasets,  
688 that is, with only one set of parameters per participant. Although there are small differences in  
689 the model order (Figure 6D), the overall findings are the same as before: the M-Avg model with  
690  $\varepsilon = |\Delta|$  comes out as the overall best model and the four IIAB models perform poorly. Hence, the

691 general conclusions of our model comparison do not seem to critically depend on whether we  
692 fit the models to single sessions or to full datasets.

693

### 694 **Fits to summary statistics**

695 So far, we have been comparing models based on log likelihoods computed from fitting  
696 raw data. One might argue, however, that it is also important that a model captures key summary  
697 statistics derived from the raw data. In the context of probability estimation, Gallistel et al.,  
698 (2014) argued that two important summary statistics are the step widths and step heights. While  
699 we agree with this, we are not convinced by their conclusion that it is impossible for *any* trial-  
700 by-trial updating model to account for the empirical joint distributions of these statistics. The  
701 problem is that this conclusion was based on visual inspection of model behaviour for a  
702 supposedly small number of manually picked parameter settings, rather than on a systematic  
703 exploration of the parameter space.

704 To investigate more formally how well the models are able to account for the empirical  
705 joint distributions of step widths and step heights, we use an optimisation algorithm to find the  
706 parameters that minimise the Jensen-Shannon divergence<sup>8</sup> (JSD) between the empirical and the  
707 predicted distributions. Since repeated computation of joint distributions makes this  
708 optimisation very time-consuming, we fit the models with only one threshold variant in the  
709 second model factor. To make it unlikely that our choice biases the results in favour of the trial-  
710 by-trial models, we choose  $\epsilon=|\Delta|\times n$  for all three models, which was the most successful variant  
711 for the IIAB model in the main analysis (Figure 3). We fit these models to full datasets, because  
712 joint distributions for session-based data often contain too few data points for reliable fitting.

713 The left panel of Figure 7A presents the empirical data that led Gallistel et al. (2014) to  
714 conclude that there are serious discrepancies between the kind of patterns generated by  
715 participants and those generated by trial-by-trial models. In contrast to their conclusion,  
716 however, we find that the three models perform approximately equally well, both visually  
717 (Figure 7A) and in terms of JSD (IIAB:  $0.22\pm 0.03$ ; Delta:  $0.22\pm 0.04$ ; M-Avg:  $0.19\pm 0.04$ ). Also  
718 at the individual level, visual inspection of the fits does not indicate an advantage of the IIAB  
719 model over the M-Avg and Delta models in any of the experiments (Figure 7B). In fact, when  
720 averaging the JSD across all 89 participants (Figure 8A), the IIAB model accounts for the  
721 distributions substantially worse than the M-Avg and Delta models (IIAB:  $0.28\pm 0.017$ ; Delta:  
722  $0.17\pm 0.013$ ; M-Avg:  $0.17\pm 0.011$ ).

---

<sup>8</sup> The Jensen-Shannon divergence is a symmetric variant of the Kullback-Leibler divergence and has the advantage that it is always finite, even when one of the inputs is zero.

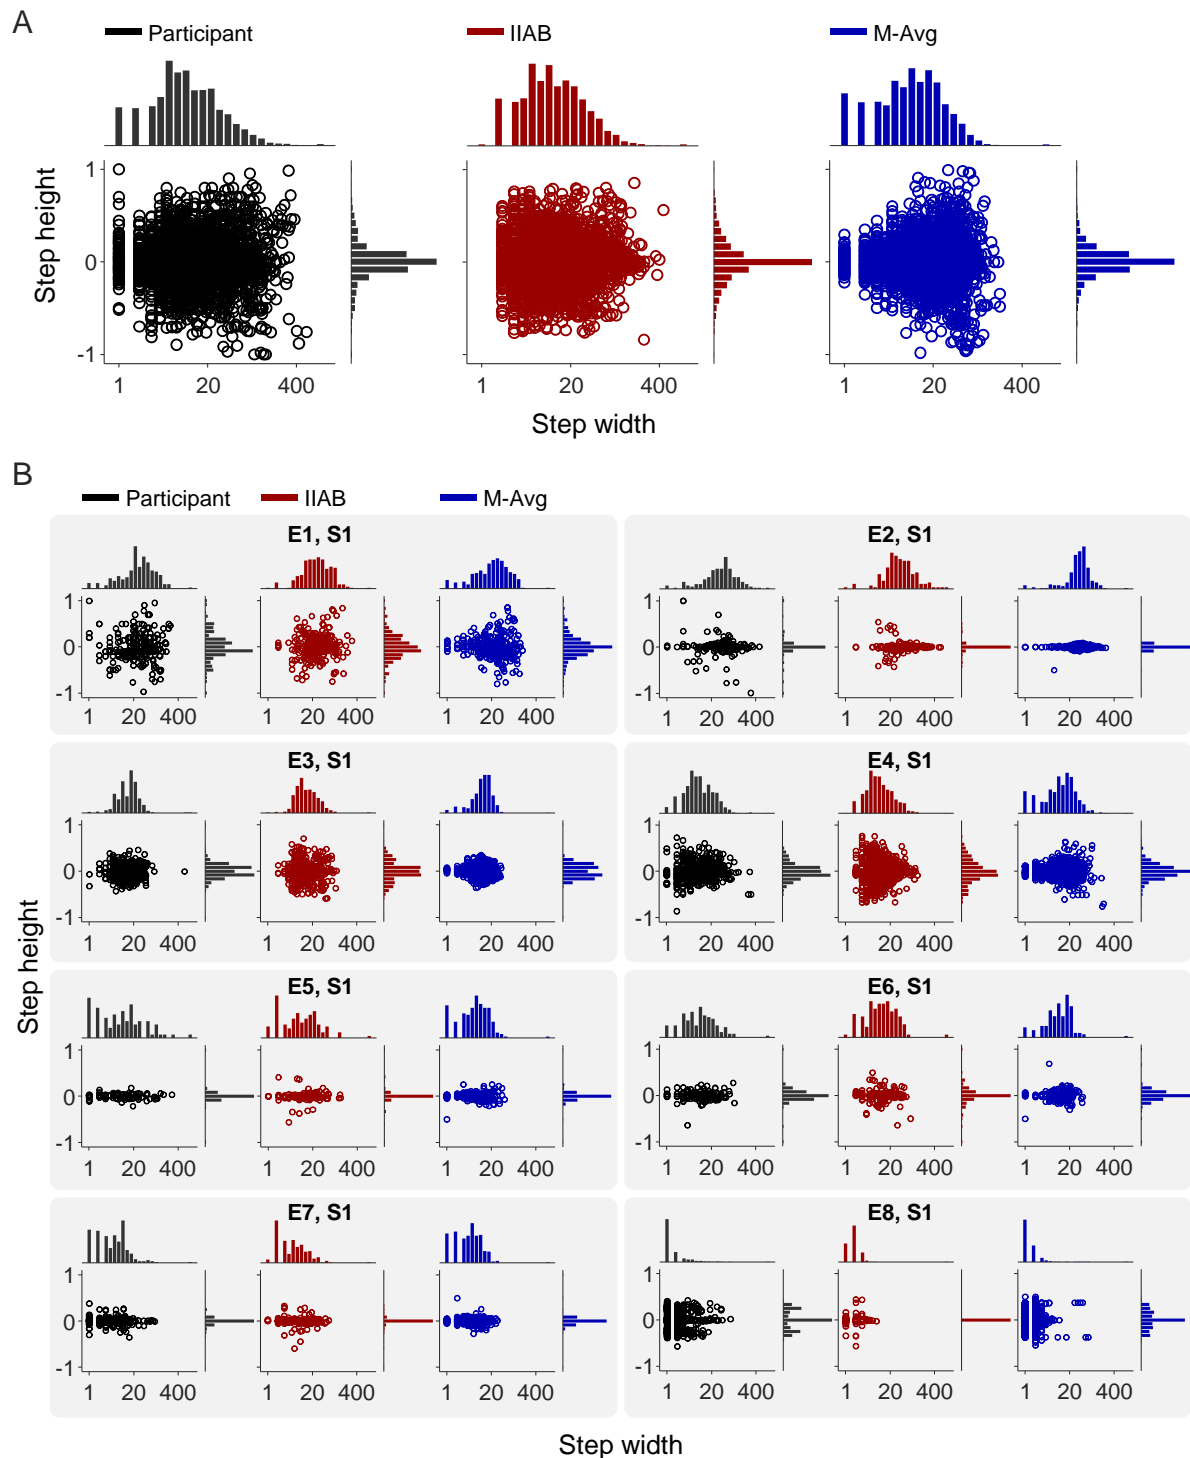

**Figure 7 | Model fits to summary statistics.** (A) Left: Joint distribution of step widths and step heights of all participants in E1 pooled together (cf. Figure 15 in Gallistel et al., 2014). Center: pooled fits of the IIAB model. Right: pooled fits of the M-Avg model. (B) Subject-level joint distributions of step widths and step heights and fits of the IIAB and M-Avg models. The first participant of each experiment is shown. Fits of the Delta model look very similar to those of the M-Avg model (see Supplementary Materials).

723

724



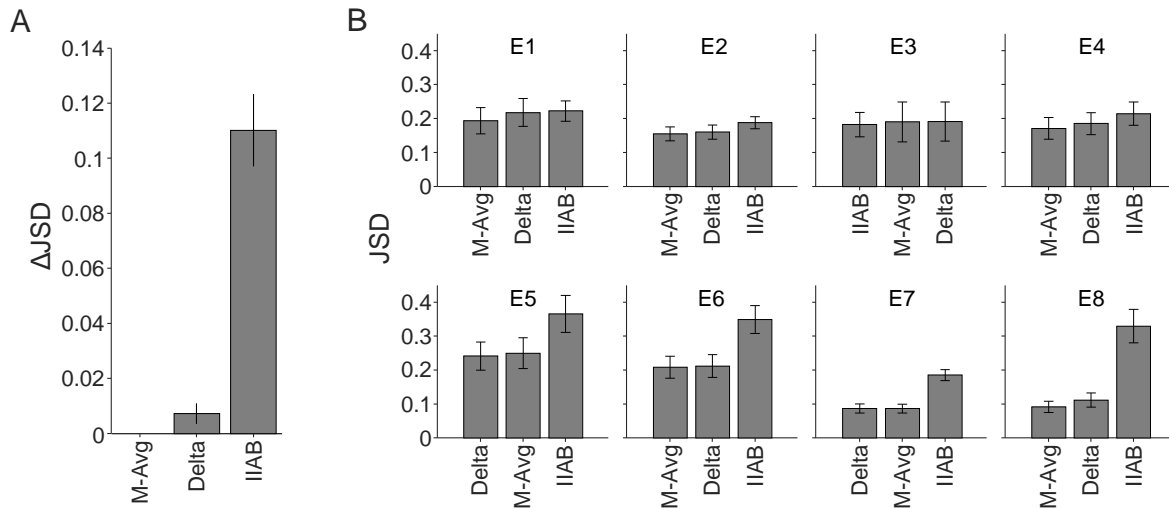

**Figure 8 | Model comparison based on fits to summary statistics.** (A) Jensen-Shannon divergence (JSD) between data and fit, averaged across all participants and expressed relative to the M-Avg model. A larger values indicates a worse fit. (B) JSD values averaged across participants and split by experiment.

725

726

727

728

729

730

731

732

733

734

735

736

737

738

At the level of individual experiments, the IIAB model has the worst JSD in seven of the eight cases (Figure 8B); the only exception is E3, where all models have approximately equal JSD, probably because it consists of only three participants. Overall, these results are consistent with our main analysis in the sense that the Delta and M-Avg mechanisms perform roughly equally well and better than the IIAB mechanism. However, it has to be noted that the JSD differences are very small in comparison to the AIC differences (Figure 3). This is because a summary statistic can never contain more information than the raw data from which it is derived, which follows from a theorem known as the data processing inequality (Cover & Thomas, 2005). We quantified this difference in a previous study (albeit in a different context), where we found that the summary statistics contained only 0.15% of the evidence present in the raw data (van den Berg & Ma, 2014). In light of this, we prefer to give more weight to likelihood-based comparisons than comparisons based on summary statistics.

739

740

741

742

743

744

In conclusion, even if one considers the joint distribution of step widths and step heights as the sole criterion to evaluate models on, there seems to be no ground for ruling out trial-by-trial models. If anything, the trial-by-trial models explain the data better than the hypothesis-testing model.

743

744

### Slider updating consistency

745

746

The three updating mechanisms considered in this study (IIAB, Delta, M-Avg) have in common that belief updates are always consistent with the most recent observation: observing

747 a blue increases the estimate of  $p_{\text{blue}}$  and observing a ring of the other colour decreases it.  
748 However, we find that across all 89 participants in our dataset, on average only  $75.8 \pm 1.8\%$  of  
749 the updates were consistent with the most recent observation (range: 68.9% to 80.3%). Hence,  
750 about one in every four updates was made in the direction opposite to the most recent observed  
751 outcome. Threshold variability may be one source of these inconsistencies. To see why this is  
752 the case, suppose that a participant observes three blue rings followed by a red one. If the  
753 updating threshold happened to be high in the first three trials and low in the last trial, it can  
754 happen that a slider update is made only in the fourth trial.

755 In agreement with our intuitions, we find that updating behaviour in the fits (to full  
756 datasets) is 100% for all M-Avg and Delta models without threshold variability. However,  
757 somewhat to our surprise, for the IIAB model we find that a small proportion of the updates  
758 ( $1.4 \pm 0.3\%$  across all 89 participants) is inconsistent with the last observation. We suspect that  
759 this may have to do with the ability of the model to have “second thoughts”, that is, to take back  
760 an earlier made update. In any case, models without threshold variation predict much higher  
761 updating consistency than what is observed in the data.

762 For models with threshold variation, we find substantially lower consistency values in the  
763 fits:  $91.6 \pm 0.8\%$  (IIAB with  $\varepsilon = |\Delta|$ ),  $83.7 \pm 1.6\%$  (Delta with  $\varepsilon = |\Delta|$ ), and  $83.6 \pm 1.0\%$  (M-Avg with  
764  $\varepsilon = |\Delta|$ ). These results show that threshold variance may be one explanation for participants’  
765 updating consistency rates. However, since they are still somewhat overestimated by these  
766 models, it is likely that there are other sources too. Participants could, for example, be inferring  
767 local sequential dependencies in the data. This would lead to beliefs of the form “the next ring  
768 will surely be red since I have just drawn three blue ones” as opposed to “there is a high chance  
769 of drawing a blue ring given that I have just drawn several of them”, and thus inconsistent  
770 updating.

771

## 772 **Discussion**

773 The most important point to take away from the modelling analyses is that – contrary to  
774 previous claims – we find no compelling evidence against trial-by-trial updating in human  
775 estimation of non-stationary probabilities. In fact, we find this class of models to be more  
776 successful at explaining behaviour than the hypothesis-testing models, with very high  
777 consistency: it holds across all eight available datasets; it holds for models with and without  
778 threshold variability; it is independent of whether model comparison is based on AIC values or  
779 on cross-validation; it is independent of whether model comparison is based on raw data or

780 summary statistics; it is independent of whether we fit the models to full data sets or per session;  
781 and it still holds if we add a second variable threshold to the IIAB model.

782 It is difficult to say which of the two types of trial-by-trial models is the more successful  
783 one. When applied to data from probability estimation tasks, M-Avg models have a slight  
784 advantage over Delta models in AIC-based model comparison. However, the results are  
785 reversed in model comparison based on cross validation and in the results from the binary  
786 prediction task. Altogether, these results suggest to us that the two classes of models make very  
787 similar predictions, but that M-Avg models may be more susceptible to overfitting.

788 Allowing the threshold to vary is important for any model to describe the participants'  
789 behaviour well. This kind of variance could have multiple origins. For example, it could be that  
790 the neural representation of the threshold varies due to neural noise. Another possibility is that  
791 the revisions of the threshold depend on the participant's level of attention, which may fluctuate  
792 over time, especially in long experiments of the type considered here. Similarly, the threshold  
793 as such can be interpreted in several ways. Gallistel et al., (2014) assumed any threshold to be  
794 an integral part of the estimation procedure, while Khaw et al., (2017) suggest that it arises from  
795 rational adaptation to the cognitive costs of updating. Yet others may envisage it as the result  
796 of motor "laziness", which could be an equally rational outcome of a trade-off between motor  
797 cost and expected reward. All in all, the psychological interpretation of the updating threshold  
798 requires further study.

799 Our finding that the two-kernel delta-rule model outperformed all other models on the  
800 probability estimation task suggests that participants may have been keeping track of both slow  
801 and fast changes in the probability that they were estimating. Another possible explanation is  
802 that they were in fact behaving as described by a single-kernel model that updates its learning  
803 rate as a function of the prediction errors, as suggested by Behrens et al. (2007). Intuitively, this  
804 mechanism should be able to solve the problem which a regular trial-by-trial model will face  
805 when tracking a function with large but infrequent changes: that the estimate sometimes needs  
806 to be highly sensitive to new observations and at other times less sensitive in order to track it  
807 well. This is an interesting question for future work.

808 Lastly, we made an interesting observation which to the best of our knowledge has not  
809 been reported before: a rather large proportion of the slider updates was inconsistent with the  
810 most recent draw from the Bernoulli distribution. While threshold variability may be part of the  
811 explanation, we suspect that there are other sources too. Since the origin of these inconsistencies  
812 could be informative about the underlying belief updating mechanism, further investigation of  
813 this issue could lead to important improvements of the theories.

## 814 **GENERAL DISCUSSION**

815 While there is an extensive literature on human estimation of stationary probabilities  
816 (Edwards, 1961; Estes, 1976; Fiedler, 2000; Peterson & Beach, 1967), research on estimation  
817 of non-stationary probabilities has only just begun. An important observation made by the  
818 studies that have been pioneering this area is that humans tend to report their probability updates  
819 in a stepwise manner (Gallistel et al., 2014; Khaw et al., 2017; Ricci & Gallistel, 2017;  
820 Robinson, 1964). Ricci and Gallistel (2017) posited that explaining this kind of behaviour is  
821 the number one challenge for any model based on trial-by-trial updating. In this article, we took  
822 up this challenge and scrutinised the claim in two ways. First, we reported empirical data which  
823 investigated the malleability of these observed stepwise behaviours, and which expanded the  
824 empirical data base for distinguishing between the different models considerably. Second, we  
825 evaluated the different models using more rigorous likelihood-based model comparisons,  
826 applying them both to our new data and to the data sets from three previously published studies.

827 In the experiment, using two novel manipulations, we found evidence that particulars of  
828 the experimental design affect the discreteness in the response patterns, in turn suggesting that  
829 the stepwise behaviours need not exclusively or mainly be a signature of hypothesis testing. In  
830 particular, the finding that the extent of stepwise behaviours is strongly affected by the effort  
831 required to produce the response indicates that there are covert changes in beliefs that are not  
832 disclosed when there are asymmetric costs of maintaining vs. changing the response. The rate  
833 of stepwise behaviour was also affected by instructions about the non-stationarity of the  
834 process, indicating that there are a priori adaptations of the process that are responsive to  
835 instructions (e.g., changes in the priors across a hypothesis space or changes in the sampling  
836 window effectively used for estimation). The characteristic patterns of rare and large changes  
837 observed in the previous studies were not general, but mainly observed in one of the four  
838 experimental cells.

839 Furthermore, using rigorous model comparison methods, we found that not only our own  
840 data, but also all previous data sets are better accounted for by models based on trial-by-trial  
841 updating than by models based on hypothesis testing. This conclusion held across eight data  
842 sets and across a variety of different criteria for evaluating the fit of the models. However, we  
843 should immediately point out that the ambition of this article is not to proclaim the death of  
844 hypothesis testing models, but rather to suggest that the reports of the death of trial-by-trial  
845 learning models have been greatly exaggerated. Ultimately, we would expect that – as is true  
846 in most areas of cognitive science – the mind is able to draw on several different cognitive  
847 processes for learning about a property as fundamental to adaptation as probability.

## 848 **More challenges**

849 While the modelling results presented above may appear conclusive, Ricci and Gallistel  
850 (2017) raised several additional challenges for trial-by-trial models in excess of the question of  
851 how to explain stepwise updating. Here, we briefly address these. The first one is to explain  
852 that “participants perceive the changes themselves” when there are abrupt and large changes.  
853 The authors considered the possibility of a trial-by-trial model with both a slow and fast kernel,  
854 the latter of which should be able to detect abrupt changes. However, they rejected that model  
855 because they were unable to find parameter settings that produced summary statistics matching  
856 the patterns in participant data. Here, we performed a rigorous model comparison and found  
857 that the two-kernel delta-rule model actually beats all other models that we tested. Based on  
858 this finding, we believe that it would be interesting for future work to examine to what extent  
859 perceptions of abrupt changes in a two-kernel Delta-rule model coincide with those perceived  
860 by participants.

861 Another challenge posited by Ricci and Gallistel (2017) is to explain that participants  
862 sometimes have “second thoughts about previously perceived changes in the hidden  
863 parameter”. An elegant property of the IIAB model is that the prediction of second thoughts is  
864 integral to its updating mechanism. However, we believe that it would be wrong to reject trial-  
865 by-trial model based on the fact that they need additional assumptions to account for second  
866 thoughts, because they might very well be governed by a separate process. A circumstance (in  
867 this case a button) which explicitly invites people to re-evaluate their previous beliefs might  
868 induce them to do so, but that is not to say that such behaviour must be integral to the iterated  
869 online estimation which the present paradigm investigates.

870 A final challenge posited by Ricci and Gallistel (2017) is to explain that participants are  
871 able to extract abstract information about the function that guides the true value of the  
872 probability that they are tracking. In line with their findings, we observed in the post-experiment  
873 questionnaires that many participants produced something that resembled a sinusoidal function  
874 when asked to draw the function they believed they had been tracking. An appealing feature of  
875 the IIAB is that the higher-order structure of the generative function may be derived from its  
876 record of change points. However, the same is true for the M-Avg models, which keep a history  
877 of previous outcomes. As was the case with the issue of second thoughts, we argue that  
878 inference of the underlying function may be governed by a mechanism that is separate from the  
879 updating mechanism. We agree with Ricci and Gallistel (2017) that such a mechanism should  
880 rely on some sort of sequence memory, but that does not imply that the updating must too. To  
881 shed more light on this, more data are required about the relation between sequences of

882 observed outcomes and the kind of abstract structures that participants infer from these  
883 sequences.

884

### 885 **Heterogeneity in updating strategies**

886 Our model comparison results were unambiguous when considered at the group level: the  
887 M-Avg mechanism accounted best for the data, followed by first the Delta mechanism and then  
888 the IIAB mechanism (Figures 3 and 4). However, at the level of individual participants, we  
889 observed substantial heterogeneity in the results (Figure 3A). There are two possible  
890 explanations for this. First, there may be true heterogeneity in the underlying cognition, in  
891 which case it would be misleading to consider only group-level results. Second, the  
892 heterogeneity could be an artefact caused by limitations of the analysis, such as the finite size  
893 of the dataset, the use of a custom likelihood function, and the lack of guarantee that the  
894 optimisation algorithm always converged to the maximum of this function. Indeed, the model  
895 recovery analysis (Appendix C) showed some misclassifications even when the true model was  
896 in the set of fitted models, although never between updating mechanisms. We can, at present,  
897 neither rule out nor confirm that different individuals used different updating strategies.

898

### 899 **Limitations**

900 A first limitation of the present study is that we did not test hybrid models. Since the main  
901 goal was to scrutinise previous conclusions drawn about the viability of trial-by-trial models,  
902 we considered the testing of hybrid models outside the scope of the present work. However,  
903 since hypothesis-testing and trial-by-trial updating are not necessarily mutually exclusive, the  
904 most promising models might be ones that combine the two processes.

905 We also mentioned above that there remain unexplained differences between the observed  
906 consistency rates and those predicted by the models. Intuitively, one possible cause is that  
907 participants infer sequential dependencies within random processes (Ayton & Fischer, 2004).  
908 A participant who is under the impression that, say, three blues in a row indicate that the next  
909 ring is most likely going to be red should update inconsistently after observing that sequence.  
910 This has not been addressed in our experimentation or modelling, but experimental data exists  
911 from a paradigm similar to our own. Toda (1958) rigged the Bernoulli sequence in his  
912 probability estimation task in such a way that there were sequential patterns in the outcomes,  
913 allowing him to study if these were inferred through observing the participants' subjective  
914 probabilities. He inferred from the data that participants estimate probabilities in a way that is  
915 approximately the Bayesian solution of a higher order Markov process – a non-trivial trial-by-



916 trial model. We are, however, reluctant to accept this conclusion. The problem is that the  
917 probability estimates in Toda's task were derived indirectly from decisions in an ultimatum  
918 bargaining game and thus likely to have been affected by first-mover advantage and people's  
919 fairness concerns (Güth, 1995; Güth & Van Damme, 1998; Slembeck, 1999; Thaler & Camerer,  
920 1995). This may have biased his estimates. Future studies could adapt the present task with  
921 Toda's (1958) rigged sequences to see if this increases the inconsistency rates beyond those in  
922 a non-rigged control condition.

923 Another limitation is that we performed model comparisons based on a custom likelihood  
924 function, because the proper likelihood function was intractable. Even though model recovery  
925 analysis confirmed that the chosen function allowed for reliable model comparison, better  
926 choices might have been possible and could have led to more conclusive results in terms of  
927 distinguishing the four threshold mechanisms in the second model factor. We constructed the  
928 custom likelihood function mainly based on "educated guesses" of what aspects are important  
929 to consider. An alternative and probably better way would have been to *derive* a likelihood  
930 function by starting with the proper one and then make simplifications until it becomes  
931 tractable.

932 Lastly, during our debriefings, some participants reported that they counted or chunked  
933 the observations. This could possibly imply a trivial dual-strategy hypothesis: some people  
934 attempt to solve the task by counting, a strategy which is highly inefficient in the chaotic world  
935 outside of the laboratory. When they update intuitively, they use a different system which does  
936 not require working memory retention of observations. Manipulating working memory capacity  
937 may confirm or reject this hypothesis and inform future studies which want to use similar tasks  
938 – since most scientists presumably will be more interested in the second, intuitive system we  
939 must know if we need to control for counting.

940

#### 941 **Relation to behavioural economics**

942 In their seminal work "Theory of Games and Economic Behavior", originally published  
943 in 1944, von Neumann and Morgenstern (2007) begin by recognising the fact that a "universal  
944 system" of economic theory is not achievable in the foreseeable future, largely due to the lack  
945 of a sufficient body of empirical observations. In anticipation of that, they make-do with "some  
946 commonplace experience of human behavior" to demonstrate the mathematical framework we  
947 today recognise as game theory. These behavioural assumptions have been criticised by  
948 behavioural economists and cognitive psychologists (e.g. Mullainathan & Thaler, 2015;  
949 Schoemaker, 1982; Tversky, 1975). Some studies have introduced modifications (e.g. Caplin



950 & Leahy, 2001; O’Donoghue & Rabin, 1999), but there have been few comprehensive  
951 replacements. A well-validated, robust theory of probability perception would be an important  
952 step towards such an end. We believe that the present work is a contribution to the construction  
953 of such a theory.

954

### 955 **Concluding remarks**

956 To the best of our knowledge, the first study that investigated human estimation of non-  
957 stationary probabilities directly was performed in 1964 (Robinson, 1964). After that, it took  
958 another 50 years before a serious modelling attempt was initiated to obtain an understanding of  
959 the mechanism behind this important cognitive function (Gallistel et al., 2014). That attempt  
960 culminated in a rejection of the entire class of trial-by-trial models and the proposal that humans  
961 instead use hypothesis testing to track non-stationary probabilities. Here, we scrutinised that  
962 proposal and found that there is actually much stronger evidence for trial-by-trial updating than  
963 for hypothesis testing. Hence, the rejection of trial-by-trial models seems to have been  
964 premature. However, considering the juvenility of this field of research, we believe that it would  
965 be equally wrong to use these results to rule out hypothesis-testing models. In the end, it may  
966 turn out that humans use a mix of strategies. Therefore, future studies might benefit from  
967 starting to look into hybrid models instead of continuing to restrict themselves to one particular  
968 class. In doing so, they should strive to bring all the findings – from function learning through  
969 binary choice to probability inference – under one umbrella. That way, applied researchers such  
970 as economists may find important uses for the work.

971

### 972 **ACKNOWLEDGEMENTS**

973 We thank Randy Gallistel and Matthew Ricci for sharing their data with us and for several  
974 helpful discussions about their experiments. The research was funded by the Swedish Research  
975 Council (Grant 2018-01947) and the Marcus and Amalia Wallenberg Foundation (MAW  
976 2016.0132).

977

### 978 **CREDIT AUTHOR STATEMENT**

979 **Mattias Forsgren:** Conceptualization, Methodology, Validation, Formal Analysis,  
980 Investigation, Data Curation, Writing – Original Draft, Writing – Reviewing & Editing. **Peter**  
981 **Juslin:** Conceptualization, Methodology, Formal Analysis, Writing – Original Draft, Writing  
982 – Reviewing & Editing, Supervision, Project Administration, Funding Acquisition. **Ronald van**  
983 **den Berg:** Conceptualization, Methodology, Software, Validation, Formal Analysis, Data

984 Curation, Writing – Original Draft, Writing – Reviewing & Editing, Visualization, Supervision,  
985 Project Administration, Funding Acquisition.

986

## 987 REFERENCES

- 988 Acerbi, L., & Ma, W. J. (2017). Practical Bayesian Optimization for Model Fitting with  
989 Bayesian Adaptive Direct Search. *Advances in Neural Information Processing Systems*  
990 *30*, 1836–1846. <https://doi.org/10.1101/150052>
- 991 Akaike, H. (1974). A new look at the statistical model identification. *IEEE Transactions on*  
992 *Automatic Control*, *19*(6), 716–723. <https://doi.org/10.1109/TAC.1974.1100705>
- 993 Ashby, F. G., & Valentin, V. V. (2017). Multiple systems of perceptual category learning:  
994 Theory and cognitive tests. In *Handbook of categorization in cognitive science, 2nd ed.*  
995 (pp. 157–188). <https://doi.org/10.1016/B978-0-08-101107-2.00007-5>
- 996 Ayton, P., & Fischer, I. (2004). The hot hand fallacy and the gambler’s fallacy: Two faces of  
997 subjective randomness? *Memory and Cognition*. <https://doi.org/10.3758/BF03206327>
- 998 Barbey, A. K., & Sloman, S. A. (2007). Base-rate respect: From ecological rationality to dual  
999 processes. *Behavioral and Brain Sciences*. <https://doi.org/10.1017/S0140525X07001653>
- 1000 Behrens, T. E. J., Woolrich, M. W., Walton, M. E., & Rushworth, M. F. S. (2007). Learning  
1001 the value of information in an uncertain world. *Nature Neuroscience*.  
1002 <https://doi.org/10.1038/nn1954>
- 1003 Brehmer, B. (1974). Hypotheses about relations between scaled variables in the learning of  
1004 probabilistic inference tasks. *Organizational Behavior and Human Performance*.  
1005 [https://doi.org/10.1016/0030-5073\(74\)90002-6](https://doi.org/10.1016/0030-5073(74)90002-6)
- 1006 Brehmer, B. (1980). In one word: Not from experience. *Acta Psychologica*.  
1007 [https://doi.org/10.1016/0001-6918\(80\)90034-7](https://doi.org/10.1016/0001-6918(80)90034-7)
- 1008 Bruner, J. S., Goodnow, J. J., & Austin, G. A. (1956). A study of thinking. In *A study of*  
1009 *thinking*. Oxford, England: John Wiley and Sons.
- 1010 Busemeyer, J. R., & Myung, I. J. (1988). A New Method for Investigating Prototype  
1011 Learning. *Journal of Experimental Psychology: Learning, Memory, and Cognition*.  
1012 <https://doi.org/10.1037/0278-7393.14.1.3>
- 1013 Caplin, A., & Leahy, J. (2001). Psychological expected utility theory and anticipatory  
1014 feelings. *Quarterly Journal of Economics*. <https://doi.org/10.1162/003355301556347>
- 1015 Costello, F., & Watts, P. (2014). Surprisingly rational: Probability theory plus noise explains  
1016 biases in judgment. *Psychological Review*. <https://doi.org/10.1037/a0037010>
- 1017 Cover, T. M., & Thomas, J. A. (2005). Elements of Information Theory. In *Elements of*

- 1018 *Information Theory*. <https://doi.org/10.1002/047174882X>
- 1019 Edwards, W. (1961). Probability learning in 1000 trials. *Journal of Experimental Psychology*.  
1020 <https://doi.org/10.1037/h0041970>
- 1021 Estes, W. K. (1976). The cognitive side of probability learning. *Psychological Review*.  
1022 <https://doi.org/10.1037/0033-295X.83.1.37>
- 1023 Fiedler, K. (2000). Beware of samples! A cognitive-ecological sampling approach to  
1024 judgment biases. *Psychological Review*. <https://doi.org/10.1037/0033-295X.107.4.659>
- 1025 Gallistel, C. R., Krishan, M., Liu, Y., Miller, R., & Latham, P. E. (2014). The perception of  
1026 probability. *Psychological Review*. <https://doi.org/10.1037/a0035232>
- 1027 Gemmeke, J. F., Virtanen, T., & Hurmalainen, A. (2011). Exemplar-based sparse  
1028 representations for noise robust automatic speech recognition. *IEEE Transactions on*  
1029 *Audio, Speech and Language Processing*. <https://doi.org/10.1109/TASL.2011.2112350>
- 1030 Gigerenzer, G., & Hoffrage, U. (1995). How to improve Bayesian reasoning without  
1031 instruction: Frequency formats. *Psychological Review*. <https://doi.org/10.1037/0033->  
1032 [295X.102.4.684](https://doi.org/10.1037/0033-295X.102.4.684)
- 1033 Grosse, I., Bernaola-Galván, P., Carpena, P., Román-Roldán, R., Oliver, J., & Stanley, H. E.  
1034 (2002). Analysis of symbolic sequences using the Jensen-Shannon divergence. *Physical*  
1035 *Review E - Statistical Physics, Plasmas, Fluids, and Related Interdisciplinary Topics*.  
1036 <https://doi.org/10.1103/PhysRevE.65.041905>
- 1037 Güth, W. (1995). On ultimatum bargaining experiments - A personal review. *Journal of*  
1038 *Economic Behavior and Organization*. [https://doi.org/10.1016/0167-2681\(94\)00071-L](https://doi.org/10.1016/0167-2681(94)00071-L)
- 1039 Güth, W., & Van Damme, E. (1998). Information, Strategic Behavior, and Fairness in  
1040 Ultimatum Bargaining: An Experimental Study. *Journal of Mathematical Psychology*.  
1041 <https://doi.org/10.1006/jmps.1998.1212>
- 1042 Hertwig, R., & Erev, I. (2009). The description-experience gap in risky choice. *Trends in*  
1043 *Cognitive Sciences*. <https://doi.org/10.1016/j.tics.2009.09.004>
- 1044 JASP Team. (2019). JASP (Version 0.10.2). [*Computer Software*].
- 1045 Juslin, P., & Persson, M. (2002). PROBABILITIES from EXemplars (PROBEX): A “lazy”  
1046 algorithm for probabilistic inference from generic knowledge. *Cognitive Science*.  
1047 [https://doi.org/10.1016/S0364-0213\(02\)00083-6](https://doi.org/10.1016/S0364-0213(02)00083-6)
- 1048 Juslin, P., Winman, A., & Hansson, P. (2007). The Naïve Intuitive Statistician: A Naïve  
1049 Sampling Model of Intuitive Confidence Intervals. *Psychological Review*.  
1050 <https://doi.org/10.1037/0033-295X.114.3.678>
- 1051 Kahneman, D., & Frederick, S. (2005). A model of heuristic judgment. *The Cambridge*

- 1052 *Handbook of Thinking and Reasoning*.
- 1053 Khaw, M. W., Stevens, L., & Woodford, M. (2017). Discrete adjustment to a changing  
1054 environment: Experimental evidence. *Journal of Monetary Economics*.  
1055 <https://doi.org/10.1016/j.jmoneco.2017.09.001>
- 1056 Klayman, J., & Ha, Y. W. (1987). Confirmation, Disconfirmation, and Information in  
1057 Hypothesis Testing. *Psychological Review*. <https://doi.org/10.1037/0033-295X.94.2.211>
- 1058 Lebiere, C., Stewart, T., & West, R. (2009). Applying cognitive architectures to decision-  
1059 making: How cognitive theory and the equivalence measure triumphed in the Technion  
1060 Prediction Tournament. *Proceedings of the Annual Meeting of the Cognitive Science*  
1061 *Society*, 31(31).
- 1062 Mullainathan, S. (2002). A memory-based model of bounded rationality. *Quarterly Journal of*  
1063 *Economics*. <https://doi.org/10.1162/003355302760193887>
- 1064 Mullainathan, S., & Thaler, R. H. (2015). Behavioral Economics. In *International*  
1065 *Encyclopedia of the Social & Behavioral Sciences: Second Edition*.  
1066 <https://doi.org/10.1016/B978-0-08-097086-8.71007-5>
- 1067 Neal, R. M., & Dayan, P. (1997). Factor Analysis Using Delta-Rule Wake-Sleep Learning.  
1068 *Neural Computation*. <https://doi.org/10.1162/neco.1997.9.8.1781>
- 1069 Nosofsky, R. M., & Palmeri, T. J. (1997). An Exemplar-Based Random Walk Model of  
1070 Speeded Classification. *Psychological Review*. [https://doi.org/10.1037/0033-](https://doi.org/10.1037/0033-295X.104.2.266)  
1071 [295X.104.2.266](https://doi.org/10.1037/0033-295X.104.2.266)
- 1072 O'Donoghue, T., & Rabin, M. (1999). Doing it now or later. *American Economic Review*.  
1073 <https://doi.org/10.1257/aer.89.1.103>
- 1074 Oaksford, M., & Chater, N. (1994). A Rational Analysis of the Selection Task as Optimal  
1075 Data Selection. *Psychological Review*. <https://doi.org/10.1037/0033-295X.101.4.608>
- 1076 Peterson, C. R., & Beach, L. R. (1967). Man as an intuitive statistician. *Psychological*  
1077 *Bulletin*. <https://doi.org/10.1037/h0024722>
- 1078 R Core Team. (2014). R Core Team (2014). R: A language and environment for statistical  
1079 computing. *R Foundation for Statistical Computing, Vienna, Austria*. URL  
1080 <Http://Www.R-Project.Org/>.
- 1081 Rescorla, R. A., & Wagner, A. R. (1972). A Theory of Pavlovian Conditioning: Variations in  
1082 the Effectiveness of Reinforcement and Nonreinforcement BT - Classical conditioning II:  
1083 current research and theory. In *Classical conditioning II: current research and theory*.
- 1084 Ricci, M., & Gallistel, R. (2017). Accurate step-hold tracking of smoothly varying periodic  
1085 and aperiodic probability. *Attention, Perception, and Psychophysics*.

- 1086 <https://doi.org/10.3758/s13414-017-1310-0>
- 1087 Robinson, G. H. (1964). Continuous Estimation Of A Time-Varying Probability. *Ergonomics*,
- 1088 7(1), 7–21. <https://doi.org/10.1080/00140136408930721>
- 1089 Schoemaker, P. J. H. (1982). The Expected Utility Model: Its Variants, Purposes, Evidence
- 1090 and Limitations. *Journal of Economic Literature*.
- 1091 Schwarz, G. (1978). Estimating the Dimension of a Model. *The Annals of Statistics*.
- 1092 <https://doi.org/10.1214/aos/1176344136>
- 1093 Shen, S., & Ma, W. J. (2019). Variable precision in visual perception. *Psychological Review*.
- 1094 <https://doi.org/10.1037/rev0000128>
- 1095 Slembeck, T. (1999). Reputations and Fairness in Bargaining - Experimental Evidence from a
- 1096 Repeated Ultimatum Game With Fixed Opponents. *Universität St. Gallen Discussion*
- 1097 *Paper*.
- 1098 Thaler, R. H., & Camerer, C. F. (1995). Ultimatums, Dictators and Manners. *Journal of*
- 1099 *Economic Perspectives* 9(2):209-19.
- 1100 Toda, M. (1958). Subjective inference vs. objective inference of sequential dependencies.
- 1101 *Japanese Psychological Research*. <https://doi.org/10.4992/psycholres1954.1958.1>
- 1102 Tversky, A. (1975). A critique of expected utility theory: Descriptive and normative
- 1103 considerations. *Erkenntnis*. <https://doi.org/10.1007/BF00226380>
- 1104 Tversky, A., & Kahneman, D. (1983). Extensional versus intuitive reasoning: The
- 1105 conjunction fallacy in probability judgment. *Psychological Review*.
- 1106 <https://doi.org/10.1037/0033-295X.90.4.293>
- 1107 Tversky, A., & Kahneman, D. (1992). Advances in prospect theory: Cumulative
- 1108 representation of uncertainty. *Journal of Risk and Uncertainty*.
- 1109 <https://doi.org/10.1007/BF00122574>
- 1110 van den Berg, R., Awh, E., & Ma, W. J. (2014). Factorial comparison of working memory
- 1111 models. *Psychological Review*, 121(1), 124–149. <https://doi.org/10.1037/a0035234>
- 1112 van den Berg, R., & Ma, W. J. (2014). “Plateau”-related summary statistics are uninformative
- 1113 for comparing working memory models. *Attention, Perception & Psychophysics*.
- 1114 <https://doi.org/10.3758/s13414-013-0618-7>
- 1115 Verguts, T., & Van Opstal, F. (2014). A delta-rule model of numerical and non-numerical
- 1116 order processing. *Journal of Experimental Psychology: Human Perception and*
- 1117 *Performance*. <https://doi.org/10.1037/a0035114>
- 1118 von Neumann, J., & Morgenstern, O. (2007). Theory of games and economic behavior. In
- 1119 *Theory of Games and Economic Behavior*. <https://doi.org/10.2307/3610940>

- 1120 Wason, P. C., & Johnson-Laird, P. N. (1970). A conflict between selecting and evaluating  
1121 information in an inferential task. *British Journal of Psychology*.  
1122 <https://doi.org/10.1111/j.2044-8295.1970.tb01270.x>
- 1123 Widrow, B., & Hoff, M. E. (1960). Adaptive Switching Circuits. In *Technical report no.*  
1124 *1553-1*.
- 1125 Widrow, B., & Lehr, M. A. (1993). ARTIFICIAL NEURAL NETWORKS OF THE  
1126 PERCEPTRON, MADALINE, AND BACKPROPAGATION FAMILY. In  
1127 *Neurobionics*. <https://doi.org/10.1016/b978-0-444-89958-3.50013-9>
- 1128 Zacks, R. T., & Hasher, L. (2002). Frequency processing: a twenty-five year perspective. In  
1129 *Etc. Frequency Processing and Cognition*.  
1130 <https://doi.org/10.1093/acprof:oso/9780198508632.003.0002>
- 1131  
1132



1133

**APPENDIX A – Dunn’s post hoc comparisons**

**Table A1.** *Dunn’s Post Hoc Comparisons of RMSE Between Conditions.*

| Condition |       | z-score | $W_{\text{left}}$ | $W_{\text{right}}$ | p      | $p_{\text{bonferroni}}$ | $p_{\text{holm}}$ |
|-----------|-------|---------|-------------------|--------------------|--------|-------------------------|-------------------|
| HE-UI     | HE-IN | 4.297   | 42.333            | 14.933             | < .001 | < .001                  | < .001            |
|           | LE-UI | 1.599   | 42.333            | 32.133             | 0.055  | 0.329                   | 0.165             |
|           | LE-IN | 1.526   | 42.333            | 32.600             | 0.063  | 0.381                   | 0.165             |
| HE-IN     | LE-UI | -2.697  | 14.933            | 32.133             | 0.003  | 0.021                   | 0.014             |
|           | LE-IN | -2.770  | 14.933            | 32.600             | 0.003  | 0.017                   | 0.014             |
| LE-UI     | LE-IN | -0.073  | 32.133            | 32.600             | 0.471  | 1.000                   | 0.471             |

1134

**Table A2.** *Dunn’s Post Hoc Comparisons of Kullback-Leibler Divergence Between Conditions.*

| Condition |       | z-score | $W_{\text{left}}$ | $W_{\text{right}}$ | p      | $p_{\text{bonferroni}}$ | $p_{\text{holm}}$ |
|-----------|-------|---------|-------------------|--------------------|--------|-------------------------|-------------------|
| HE-UI     | HE-IN | 4.098   | 42.200            | 16.067             | < .001 | < .001                  | < .001            |
|           | LE-UI | 1.589   | 42.200            | 32.067             | 0.056  | 0.336                   | 0.148             |
|           | LE-IN | 1.652   | 42.200            | 31.667             | 0.049  | 0.296                   | 0.148             |
| HE-IN     | LE-UI | -2.509  | 16.067            | 32.067             | 0.006  | 0.036                   | 0.030             |
|           | LE-IN | -2.446  | 16.067            | 31.667             | 0.007  | 0.043                   | 0.030             |
| LE-UI     | LE-IN | 0.063   | 32.067            | 31.667             | 0.475  | 1.000                   | 0.475             |

1135

**Table A3.** *Dunn’s Post Hoc Comparisons of Step Width Between Conditions.*

| Condition |       | z-score | $W_{\text{left}}$ | $W_{\text{right}}$ | p      | $p_{\text{bonferroni}}$ | $p_{\text{holm}}$ |
|-----------|-------|---------|-------------------|--------------------|--------|-------------------------|-------------------|
| HE-UI     | HE-IN | 2.718   | 47.933            | 30.600             | 0.003  | 0.020                   | 0.013             |
|           | LE-UI | 3.293   | 47.933            | 26.933             | < .001 | 0.003                   | 0.002             |
|           | LE-IN | 4.924   | 47.933            | 16.533             | < .001 | < .001                  | < .001            |
| HE-IN     | LE-UI | 0.575   | 30.600            | 26.933             | 0.283  | 1.000                   | 0.283             |
|           | LE-IN | 2.206   | 30.600            | 16.533             | 0.014  | 0.082                   | 0.041             |
| LE-UI     | LE-IN | 1.631   | 26.933            | 16.533             | 0.051  | 0.309                   | 0.103             |

1136

**Table A4.** *Dunn’s Post Hoc Comparisons of Step Height Between Conditions.*

| Condition |       | z-score | $W_{\text{left}}$ | $W_{\text{right}}$ | p      | $p_{\text{bonferroni}}$ | $p_{\text{holm}}$ |
|-----------|-------|---------|-------------------|--------------------|--------|-------------------------|-------------------|
| HE-UI     | HE-IN | -3.230  | 27.800            | 48.400             | < .001 | 0.004                   | 0.003             |



**Table A4.** *Dunn's Post Hoc Comparisons of Step Height Between Conditions.*

| Condition |       | z-score | $W_{\text{left}}$ | $W_{\text{right}}$ | p      | $p_{\text{bonferroni}}$ | $p_{\text{holm}}$ |
|-----------|-------|---------|-------------------|--------------------|--------|-------------------------|-------------------|
|           | LE-UI | 1.861   | 27.800            | 15.933             | 0.031  | 0.188                   | 0.063             |
|           | LE-IN | -0.324  | 27.800            | 29.867             | 0.373  | 1.000                   | 0.373             |
| HE-IN     | LE-UI | 5.091   | 48.400            | 15.933             | < .001 | < .001                  | < .001            |
|           | LE-IN | 2.906   | 48.400            | 29.867             | 0.002  | 0.011                   | 0.007             |
| LE-UI     | LE-IN | -2.185  | 15.933            | 29.867             | 0.014  | 0.087                   | 0.043             |

1137

1138 Legend: HE is High Effort, LE is Low Effort, UN is Uninformed, and IN is Informed.

1139  $W_{\text{left}}$  and  $W_{\text{right}}$  are the summed ranks of the condition in the leftmost and second to leftmost

1140 column, respectively. Non-integer values are due to rank ties.

1141

1142

### 1143 APPENDIX B – Custom likelihood function

1144

1145 In its most general form, the log likelihood function for the models considered in this

1146 study takes the form

$$1147 \quad \log p(\mathbf{R} | \boldsymbol{\theta}, \boldsymbol{\psi}, \mathbf{O}) = \sum_{t=1}^n \log p(R_t | \boldsymbol{\theta}, \boldsymbol{\psi}_{1, \dots, t-1}, R_{1, \dots, t-1}, O_{1, \dots, t-1}), \quad (4)$$

1148 where  $\mathbf{R} = \{R_1, R_2, \dots, R_n\}$  is a vector with subject responses for all  $n$  trials,  $\boldsymbol{\theta}$  is a vector with

1149 parameter values,  $\boldsymbol{\psi}$  is a matrix with latent variables, and  $\mathbf{O} = \{O_1, O_2, \dots, O_m\}$  is a vector with

1150 all Bernoulli outcomes observed by the subject. The IIAB model has multiple time-varying

1151 latent variables, including a list of change points and parameters of a beta distribution

1152 representing the observer's prior belief that any given trial is a change point (see Table 1 in

1153 Gallistel et al., 2014). The existence of these latent variables in combination with the fact that

1154 the model predictions are not independent across trials makes evaluation of the likelihood

1155 function computationally prohibitive.

1156 To circumvent this problem, we construct a "custom" likelihood function that captures

1157 the main aspects of the likelihood function proper in a computationally tractable way, yet still

1158 allows for reliable model comparison, which will be verified by a model recovery analysis

1159 (Appendix C).

1160 We believe that there are two important aspects that the likelihood function should cover  
 1161 in order to allow it for reliable model fitting and comparison. First, obviously, it should punish  
 1162 models for discrepancies between the predicted slider value and the slider value chosen by the  
 1163 subject. Second, since one of the main differences between the models is when they predict  
 1164 slider updates, it is probably also important that the likelihood function punishes models that  
 1165 predict slider updates on trials where the subject made no update and vice versa. With this in  
 1166 mind, we choose to compute the likelihood of parameters  $\theta$  for model  $M$  as follows. Let  $\mathbf{R}_{\text{subject}}$   
 1167 denote the vector with subject responses and  $\mathbf{O}$  the vector with observed Bernoulli outcomes.  
 1168 First, we compute the model's predicted response vector  $\mathbf{R}_M$ . Assuming for the moment that  
 1169 there is no threshold noise,  $\mathbf{R}_M$  is a deterministic function of  $\theta$  and  $\mathbf{O}$  for all models that we  
 1170 consider here. We can obtain  $\mathbf{R}_M$  efficiently using a forward simulation of the model, feeding  
 1171 it with  $\mathbf{O}$  while fixing the parameters to  $\theta$ . After obtaining  $\mathbf{R}_M$ , we compute the probability of  
 1172 the subject response on each trial  $t$  as follows,

1173

$$1174 \quad p(R_{\text{subject},t} | R_{M,t}) \equiv \begin{cases} 0 & R_{\text{subject},t} - R_{\text{subject},t-1} = 0, R_{M,t} - R_{M,t-1} \neq 0 \\ 0 & R_{\text{subject},t} - R_{\text{subject},t-1} \neq 0, R_{M,t} - R_{M,t-1} = 0 \\ N(R_{\text{subject},t}; R_{M,t}, \sigma_{\text{unexplained}}) & \text{otherwise,} \end{cases} \quad (5)$$

1175 where  $N(x; \mu, \sigma)$  is a normal distribution with mean  $\mu$  and standard deviation  $\sigma$ , evaluated at  
 1176 point  $x$ . This function strongly punishes models that predict an update when the subject did not  
 1177 make an update (first line of last expression in Eq. (5)) or vice versa (second line). If, on the  
 1178 other hand, the updating behaviour is consistent between model and subject (third line), the  
 1179 probability of the subject response is measured as a draw from a normal distribution centred on  
 1180 the response predicted by the model. This normal distribution can be thought of as a way to  
 1181 capture variance in the data that is left unexplained by the model: the better the model, the  
 1182 smaller the estimate of  $\sigma_{\text{unexplained}}$ . Part of this variance could be due to variability in motor  
 1183 responses, but there may be other sources too. To avoid log likelihoods equal to negative  
 1184 infinity, we assume in each model that the observer sometimes produces a random response  
 1185 drawn from a uniform distribution on  $[0,1]$ . We fix the rate of such random responses to 1 in  
 1186 1,000 trials.

1187 So far, we have assumed fixed thresholds in our construction of the likelihood function.  
 1188 However, all models that we consider here have a variable threshold, which makes the  
 1189 predictions non-deterministic: for a fixed set of parameters  $\theta$  and input vector  $\mathbf{O}$ , prediction  $\mathbf{R}_M$   
 1190 varies from run to run. To approximate the probability of the subject's response under a variable

1191 response threshold, we average the model prediction over 100 runs. We thus obtain the  
1192 following custom log likelihood function:

$$1193 \quad L(\boldsymbol{\theta}) = \sum_{t=1}^n \log \left( \frac{1}{100} \sum_{i=1}^{100} p(R_{\text{subject},t} | R_{M,t}) \right), \quad (6)$$

1194 where  $p(R_{\text{subject},t} | R_{M,t})$  is as specified in Eq. (5).

1195

1196

### APPENDIX C – Model recovery

1197

1198 We created a group of five synthetic data sets from each of the twelve models with  
1199 threshold noise, giving a total of sixty synthetic datasets. Next, we used maximum-likelihood  
1200 estimation to fit the twelve main models twenty times to all datasets. For each fit, we computed  
1201 the Akaike Information Criterion (AIC; Akaike, 1974). At the level of individual data sets,  
1202 AIC-based model comparison picks out the correct model in forty-six of the sixty cases (Figure  
1203 C, Panel A). In the remaining fourteen cases, a mistake was made with respect to the second  
1204 modelling factor, that is, the threshold mechanism. This indicates that at the individual level,  
1205 our methods are adequate for selecting the right updating mechanism (IIAB, Delta or M-Avg),  
1206 but it has some difficulties in selecting the right threshold mechanism. At the group level, on  
1207 the other hand, the correct model was selected in all cases (Figure C, panel B). These results  
1208 also indicated that the quality of fit improved very little after about ten runs of the optimizer  
1209 (Figure C, panel C).

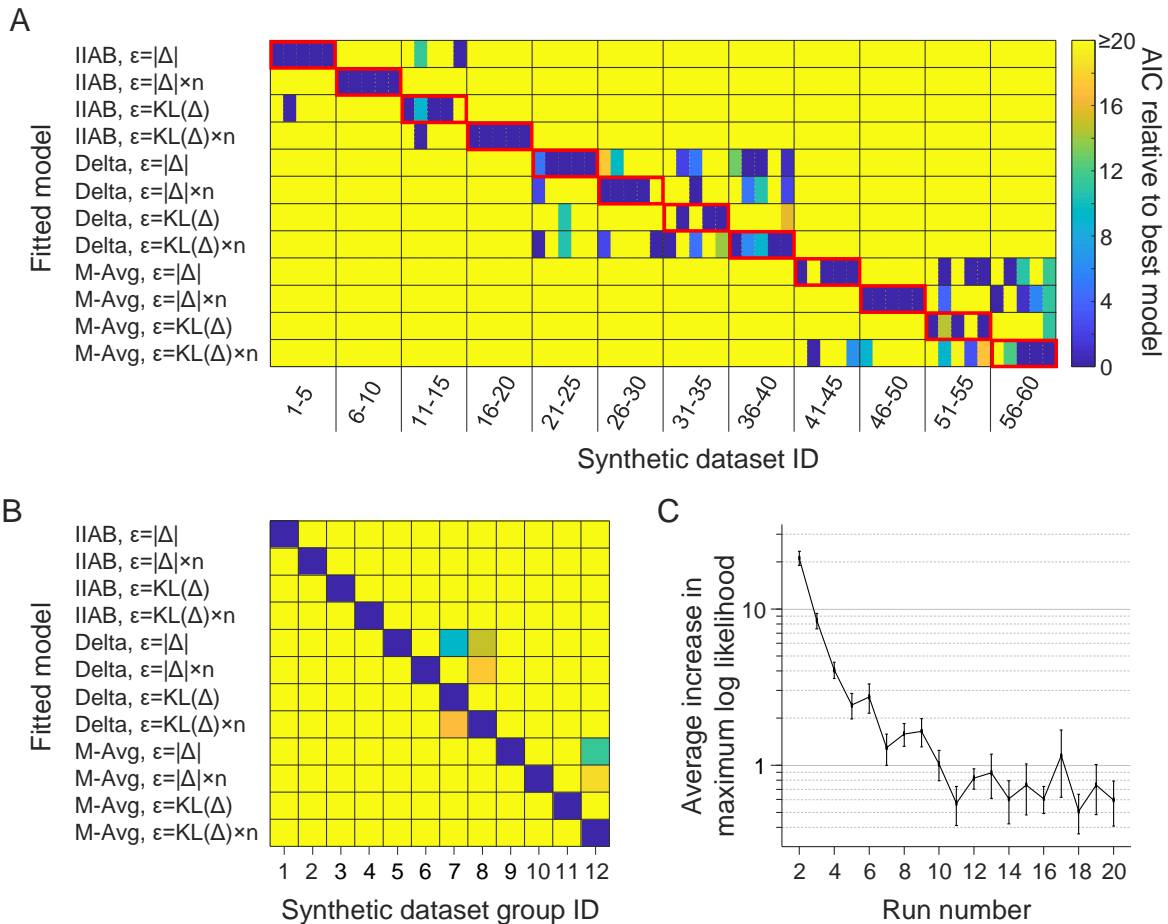

**Figure S1 | Model recovery results.** (A) AIC-based model comparison at the level of individual datasets. The colours indicate the AIC value of each individual fit relative to the best-fitting model in the respective dataset. Each column has a single best-fitting model, which by definition has a relative AIC value equal to 0. The red boxes indicate for each group of datasets which model generated them. In 46 of the 60 synthetic datasets, the correct model was selected (dark blue cells in the red boxes). In the remaining 14 datasets, an error was made in the inference of the mechanism behind the computation of  $E$ . No errors were made in the inference of the updating core mechanism (IIAB, Delta, M-Avg), meaning that these mechanism are highly identifiable, even at the level of individual subjects. (B) Relative AIC values averaged within each group of synthetic datasets that share the same generative model. In all 12 groups, the generative model was correctly selected as the model with lowest average AIC. Hence, all 12 models are identifiable at the group level, even when the group contains as few as 5 subjects. (C) The results in panels A and B were obtained by fitting each model 20 times with different initial parameter estimates. To assess how many runs are required for stable model comparison performance, this panel shows the average increase in maximum log likelihood as a function of the number of times each model was fitted. After approximately 10 runs, the average increase in maximum log likelihood rarely exceeds 1. In our analysis of human data, we fit each model 30 times.

1210

1211

1212

1213

## APPENDIX D – Cross validation results

1214

1215 In our main analysis, we fitted the models to only the first 750 trials in each dataset. Model

1216 comparison based on the log likelihood of the remaining trials (Figure D) are largely

1217 consistent with the AIC-based results (Figure 3).

1218

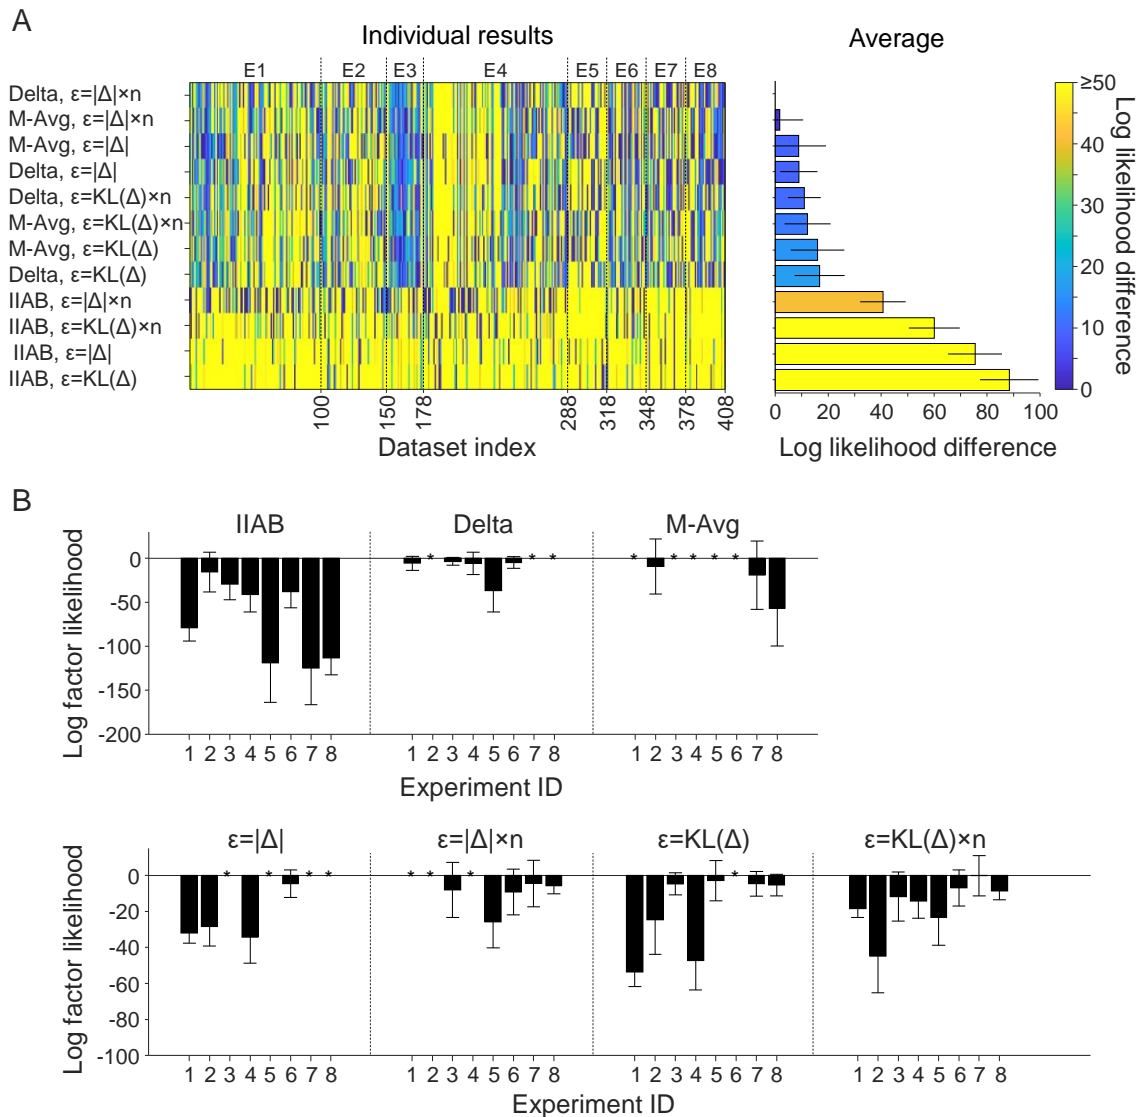

**Figure S2 | Model comparison based on cross-validated log likelihoods.** (A) Left: Log likelihood values relative to the best-fitting model for individual datasets. Right: Relative log likelihood values averaged across datasets. One may notice that the cross-validated log likelihood differences are smaller than the AIC differences presented in Figure 4. There are two reasons for this. First, AIC is defined as (roughly) twice the log likelihood and, second, the AIC values were based on three times the number of trials (750 vs 250). Hence, to make the cross-validated log likelihoods comparable to the AIC-based results, one should multiply them by a factor of 6. (B) Factor level comparison based on cross-validated log likelihoods. Top: Evidence for each level in the first factor, combined across all models. Bottom: Evidence for each level in the second factor, combined across all models. The most successful levels in each experiment are indicated by asterisks.

1219

1220

**APPENDIX E – Maximum-likelihood parameter estimates**

1221

1222 **Table E1.** *Maximum-likelihood Estimates of the Parameters of the IIAB Models.*

| Model                                   | Parameter                     | 25% Quartile          | Median                | 75% Quartile          |
|-----------------------------------------|-------------------------------|-----------------------|-----------------------|-----------------------|
| IIAB, $\varepsilon= \Delta $            | $\mu_{T1}$                    | $8.79 \times 10^{-5}$ | $9.15 \times 10^{-3}$ | $4.05 \times 10^{-2}$ |
|                                         | $\sigma_{T1}$                 | $1.23 \times 10^{-2}$ | $2.08 \times 10^{-2}$ | $3.63 \times 10^{-2}$ |
|                                         | $T_2$                         | 1.17                  | 1.60                  | 7.62                  |
|                                         | $\sigma_{\text{unexplained}}$ | $6.04 \times 10^{-2}$ | $8.50 \times 10^{-2}$ | 0.120                 |
| IIAB, $\varepsilon= \Delta  \times n$   | $\mu_{T1}$                    | $2.37 \times 10^{-3}$ | 0.693                 | 1.52                  |
|                                         | $\sigma_{T1}$                 | 1.01                  | 1.68                  | 3.53                  |
|                                         | $T_2$                         | 0.573                 | 0.927                 | 4.23                  |
|                                         | $\sigma_{\text{unexplained}}$ | $4.31 \times 10^{-2}$ | $6.33 \times 10^{-2}$ | $9.80 \times 10^{-2}$ |
| IIAB, $\varepsilon=KL \Delta $          | $\mu_{T1}$                    | $2.04 \times 10^{-4}$ | $1.31 \times 10^{-3}$ | $1.12 \times 10^{-2}$ |
|                                         | $\sigma_{T1}$                 | $2.23 \times 10^{-3}$ | $8.97 \times 10^{-3}$ | $2.29 \times 10^{-2}$ |
|                                         | $T_2$                         | 1.04                  | 1.53                  | 5.66                  |
|                                         | $\sigma_{\text{unexplained}}$ | $5.54 \times 10^{-2}$ | $8.15 \times 10^{-2}$ | 0.117                 |
| IIAB, $\varepsilon=KL \Delta  \times n$ | $\mu_{T1}$                    | $2.83 \times 10^{-4}$ | 0.199                 | 0.904                 |
|                                         | $\sigma_{T1}$                 | 0.274                 | 0.637                 | 1.23                  |
|                                         | $T_2$                         | 0.736                 | 0.984                 | 1.79                  |
|                                         | $\sigma_{\text{unexplained}}$ | $4.33 \times 10^{-2}$ | $6.69 \times 10^{-2}$ | $9.70 \times 10^{-2}$ |

1223

1224 **Table E2.** *Maximum-likelihood Estimates of the Parameter Values of the Delta-rule Models.*

| Model                                    | Parameter                     | 25% Quartile          | Median                | 75% Quartile          |
|------------------------------------------|-------------------------------|-----------------------|-----------------------|-----------------------|
| Delta, $\varepsilon= \Delta $            | $\mu_{T1}$                    | 0.142                 | 0.373                 | 0.807                 |
|                                          | $\sigma_{T1}$                 | $5.59 \times 10^{-2}$ | 0.162                 | 0.374                 |
|                                          | $\lambda$                     | $2.94 \times 10^{-2}$ | $9.27 \times 10^{-2}$ | 0.150                 |
|                                          | $\sigma_{\text{unexplained}}$ | $2.91 \times 10^{-2}$ | $6.03 \times 10^{-2}$ | $9.66 \times 10^{-2}$ |
| Delta, $\varepsilon= \Delta  \times n$   | $\mu_{T1}$                    | 0.918                 | 5.74                  | 27.2                  |
|                                          | $\sigma_{T1}$                 | 0.465                 | 3.02                  | 13.0                  |
|                                          | $\lambda$                     | $1.95 \times 10^{-2}$ | $8.81 \times 10^{-2}$ | 0.147                 |
|                                          | $\sigma_{\text{unexplained}}$ | $3.87 \times 10^{-2}$ | $6.61 \times 10^{-2}$ | 0.101                 |
| Delta, $\varepsilon=KL \Delta $          | $\mu_{T1}$                    | 0.152                 | 0.689                 | 2.41                  |
|                                          | $\sigma_{T1}$                 | $7.90 \times 10^{-2}$ | 0.456                 | 2.22                  |
|                                          | $\lambda$                     | $3.40 \times 10^{-2}$ | $9.67 \times 10^{-2}$ | 0.155                 |
|                                          | $\sigma_{\text{unexplained}}$ | $2.92 \times 10^{-2}$ | $6.02 \times 10^{-2}$ | $9.04 \times 10^{-2}$ |
| Delta, $\varepsilon=KL \Delta  \times n$ | $\mu_{T1}$                    | 0.848                 | 5.81                  | 46.5                  |

|                               |                       |                       |       |
|-------------------------------|-----------------------|-----------------------|-------|
| $\sigma_{T1}$                 | 0.638                 | 3.73                  | 26.1  |
| $\lambda$                     | $2.39 \times 10^{-2}$ | $8.75 \times 10^{-2}$ | 0.140 |
| $\sigma_{\text{unexplained}}$ | $3.83 \times 10^{-2}$ | $6.44 \times 10^{-2}$ | 0.101 |

1225

1226 **Table E3.** *Maximum-likelihood Estimates of the Parameter Values of the Memory-averaging*  
 1227 *Models.*

| Model                                    | Parameter                     | 25% Quartile          | Median                | 75% Quartile          |
|------------------------------------------|-------------------------------|-----------------------|-----------------------|-----------------------|
| M-Avg, $\varepsilon= \Delta $            | $\mu_{T1}$                    | 0.253                 | 0.470                 | 0.854                 |
|                                          | $\sigma_{T1}$                 | $5.75 \times 10^{-2}$ | 0.207                 | 0.402                 |
|                                          | $\alpha$                      | 0.854                 | 0.911                 | 0.969                 |
|                                          | $\sigma_{\text{unexplained}}$ | $2.98 \times 10^{-2}$ | $5.64 \times 10^{-2}$ | $8.22 \times 10^{-2}$ |
| M-Avg, $\varepsilon= \Delta  \times n$   | $\mu_{T1}$                    | 1.52                  | 6.36                  | 33.0                  |
|                                          | $\sigma_{T1}$                 | 0.678                 | 3.18                  | 13.4                  |
|                                          | $\alpha$                      | 0.866                 | 0.919                 | 0.982                 |
|                                          | $\sigma_{\text{unexplained}}$ | $3.83 \times 10^{-2}$ | $6.56 \times 10^{-2}$ | $9.81 \times 10^{-2}$ |
| M-Avg, $\varepsilon=KL \Delta $          | $\mu_{T1}$                    | 0.223                 | 0.761                 | 2.75                  |
|                                          | $\sigma_{T1}$                 | $7.07 \times 10^{-2}$ | 0.494                 | 2.63                  |
|                                          | $\alpha$                      | 0.843                 | 0.908                 | 0.962                 |
|                                          | $\sigma_{\text{unexplained}}$ | $3.24 \times 10^{-2}$ | $5.70 \times 10^{-2}$ | $8.43 \times 10^{-2}$ |
| M-Avg, $\varepsilon=KL \Delta  \times n$ | $\mu_{T1}$                    | 1.42                  | 7.34                  | 41.0                  |
|                                          | $\sigma_{T1}$                 | 0.848                 | 4.36                  | 21.5                  |
|                                          | $\alpha$                      | 0.858                 | 0.913                 | 0.971                 |
|                                          | $\sigma_{\text{unexplained}}$ | $3.81 \times 10^{-2}$ | $6.35 \times 10^{-2}$ | $9.21 \times 10^{-2}$ |

1228

1229

1230
