1 **Further perceptions of probability: in defence of trial-by-trial estimation models**

2  
3 Mattias Forsgren<sup>1,3</sup>, Peter Juslin<sup>1</sup> and Ronald van den Berg<sup>1,2,3</sup>

4  
5 <sup>1</sup>Department of Psychology, Uppsala University, Uppsala, Sweden

6 <sup>2</sup>Department of Psychology, Stockholm University, Stockholm, Sweden

7 <sup>3</sup>Equal contributions

8  
9  
10  
11  
12 **Running head:**

13 Further perceptions of probability

14  
15  
16  
17 **Author note**

18 Mattias Forsgren  0000-0003-0394-1626

19 Peter Juslin  0000-0001-9594-2153

20 Ronald van den Berg  0000-0001-7353-5960

21  
22 We have no conflicts of interest to disclose. The research was funded by the Swedish  
23 Research Council (Grant 2018-01947) and the Marcus and Amalia Wallenberg Foundation  
24 (MAW 2016.0132).

25 We thank Randy Gallistel and Matthew Ricci for sharing their data with us and for several  
26 helpful discussions about their experiments. We also thank Luigi Acerbi for a helpful discussion  
27 about the likelihood function.

28 Correspondence concerning this article should be addressed to Ronald van den Berg  
29 Department of Psychology, Albanovägen 12, 11419, Stockholm, Sweden. Email: ronald.van-  
30 den-berg@psychology.su.se.

31 All data analysed in this study can be found at <https://osf.io/zhv2r/>. This study was not  
32 preregistered.

34 **ABSTRACT**

35 Many events we experience are binary and probabilistic, such as the weather (rain or no rain)  
36 and the outcome of medical tests (negative or positive). Extensive research in the behavioural  
37 sciences has addressed people's ability to learn stationary probabilities (i.e., probabilities that  
38 stay constant over time) of such events, but only recently have there been attempts to model the  
39 cognitive processes whereby people learn – and track – *non-stationary* probabilities. The old  
40 debate on whether learning occurs trial-by-trial or by occasional shifts between discrete  
41 hypotheses has been revived in this context. Trial-by-trial estimation models – such as the delta-  
42 rule model – have been successful in describing human learning in various contexts. It has been  
43 argued, however, that behaviour on non-stationary probability learning tasks is incompatible  
44 with trial-by-trial learning and can only be explained by models in which learning proceeds  
45 through hypothesis testing. Here, we show that this conclusion was premature. By combining  
46 two well-supported concepts from cognitive modelling – delta-rule learning and drift diffusion  
47 evidence accumulation – we reproduce all behavioural phenomena that were previously used  
48 to reject trial-by-trial learning models. Moreover, a quantitative model comparison shows that  
49 this model accounts for the data better than a model based on hypothesis testing. In the spirit of  
50 cumulative science, our results demonstrate that a combination of two well-established theories  
51 of trial-by-trial learning and evidence accumulation is sufficient to explain human learning of  
52 non-stationary probabilities.

53

54 **KEYWORDS**

55 Probability learning; change-point model; delta-rule; belief updating; hypothesis testing; drift  
56 diffusion model

## 57 INTRODUCTION

58 The issue of how people learn and assess probabilities has been pivotal to the behavioural  
59 sciences at least since the Enlightenment and studied extensively, especially in psychology and  
60 behavioural economics. Typically, this has occurred in the context of assuming *stationary*  
61 *probabilities* in the environment (i.e., probabilities that stay constant over time). This research  
62 shows that people are good at learning probabilities from experience with relative frequencies  
63 (Edwards, 1961; Estes, 1976; Fiedler, 2000; Peterson & Beach, 1967). Yet, research on  
64 heuristics and biases shows that probability assessments are sometimes swayed by subjective  
65 (“intentional”) aspects, like prototype-similarity (representativeness) or ease of retrieval,  
66 leading to biased judgements (Kahneman & Frederick, 2005). People also appear to over-  
67 weight extreme probabilities in their decisions when encountering them in numeric form  
68 (Tversky & Kahneman, 1992), but under-weight them when they are learned inductively from  
69 trial-by-trial experience (Hertwig & Erev, 2009). People frequently have problems with  
70 reasoning according to probability theory, leading to phenomena like base-rate neglect and  
71 conjunction fallacies (Kahneman & Frederick, 2005; Tversky & Kahneman, 1983), at least if  
72 they cannot benefit from natural frequency formats (Gigerenzer & Hoffrage, 1995) that  
73 highlight the set-relations between the events (Barbey & Sloman, 2007).

74 Not all probabilities are stationary, as when, for example, the risks of default in a  
75 mortgage market fluctuate over time or the risk of hurricanes changes with a changing global  
76 climate. Since modelling how humans learn – and track – *non-stationary probabilities* involves  
77 changes in people’s beliefs about probability, it has (once again) highlighted the classical issue  
78 of whether people learn by trial-by-trial estimation or occasional shifts between discrete  
79 hypotheses (Bruner et al., 1956). A neuropsychological and psychophysical literature has  
80 suggested a cohort of models that estimate in a trial-by-trial manner (Nassar et al., 2012, 2010;  
81 Norton et al., 2019; Wilson et al., 2013, 2018) which is supported by the notion that learning  
82 rates are modulated by trial-level prediction errors registered in the anterior cingulate cortex  
83 (Behrens et al., 2007; Rushworth & Behrens, 2008; Silvetti et al., 2013). These ideas have now  
84 been challenged by a small, mostly recent literature (Gallistel et al., 2014; Khaw et al., 2017;  
85 Ricci & Gallistel, 2017; Robinson, 1964). Observations of stepwise, “staircase shaped”  
86 response patterns, explicit reports of perceived changes in the underlying probability and other  
87 phenomena have been claimed (Gallistel et al., 2014; Ricci & Gallistel, 2017) to be  
88 incompatible with trial-by-trial estimation and to require a model built on hypothesis testing.  
89 In this Theoretical Note, we scrutinise this notion through simulation and model comparison  
90 and find that it was premature: a trial-by-trial model based on two established mechanisms

91 accounts accurately for human data on probability estimation tasks and even outperforms the  
92 earlier proposed hypothesis-testing model.

93

#### 94 **Tracking Probabilities in Non-Stationary Environments**

95 While there is a large literature on how people learn stationary probabilities, there are  
96 only a few studies that have addressed learning of non-stationary probabilities. In the studies  
97 claimed to support hypothesis testing, participants were asked to estimate the hidden Bernoulli  
98 parameter by adjusting a physical lever (Robinson, 1964) or a slider on a computer screen  
99 (Gallistel et al., 2014; Khaw et al., 2017; Ricci & Gallistel, 2017). In the latter three of those  
100 studies, this was framed as the proportion of green rings in a hypothetical box visualised on a  
101 computer screen (Figure 1A). On each trial, the participant could adjust a slider in a range  
102 between 0 and 100 percent as their current estimate, before locking in their guess and initiating  
103 the next draw from the box (i.e., the next trial). Participants performed 10,000 trials and,  
104 importantly, were free to choose to revise their estimate or to leave it unchanged on any trial.  
105 Data of interest are the realised outcomes from the Bernoulli process, the underlying true  
106 probabilities of the outcomes, and the participant's estimates of these probabilities (Figure 1B).  
107 Most participants exhibited stepwise updating behaviour: for long periods they did not adjust  
108 their estimates, at other times more often, but never on every trial. One of the studies (Gallistel  
109 et al., 2014) included a button labelled "I think the box has changed" that allowed participants  
110 to indicate that they believed that there had been a change in the parameter of the Bernoulli  
111 process. Half of those participants were also provided with the option to retract their decisions  
112 by pressing a button labelled "I take that back" (so called "second thoughts", see Figure 1A).

113

#### 114 **Two classes of cognitive models: trial-by-trial estimation vs. hypothesis testing**

115 As in many areas of the psychology of learning, there are two different ways of explaining  
116 how people infer probabilities from experience: models with their origin in the associationist  
117 traditions of behaviourism, reinforcement learning, and connectionist models emphasise the  
118 continuous updating of beliefs "trial-by-trial", while models with their origin in cognitive  
119 psychology emphasise the testing of and discrete shifting between hypotheses.

120

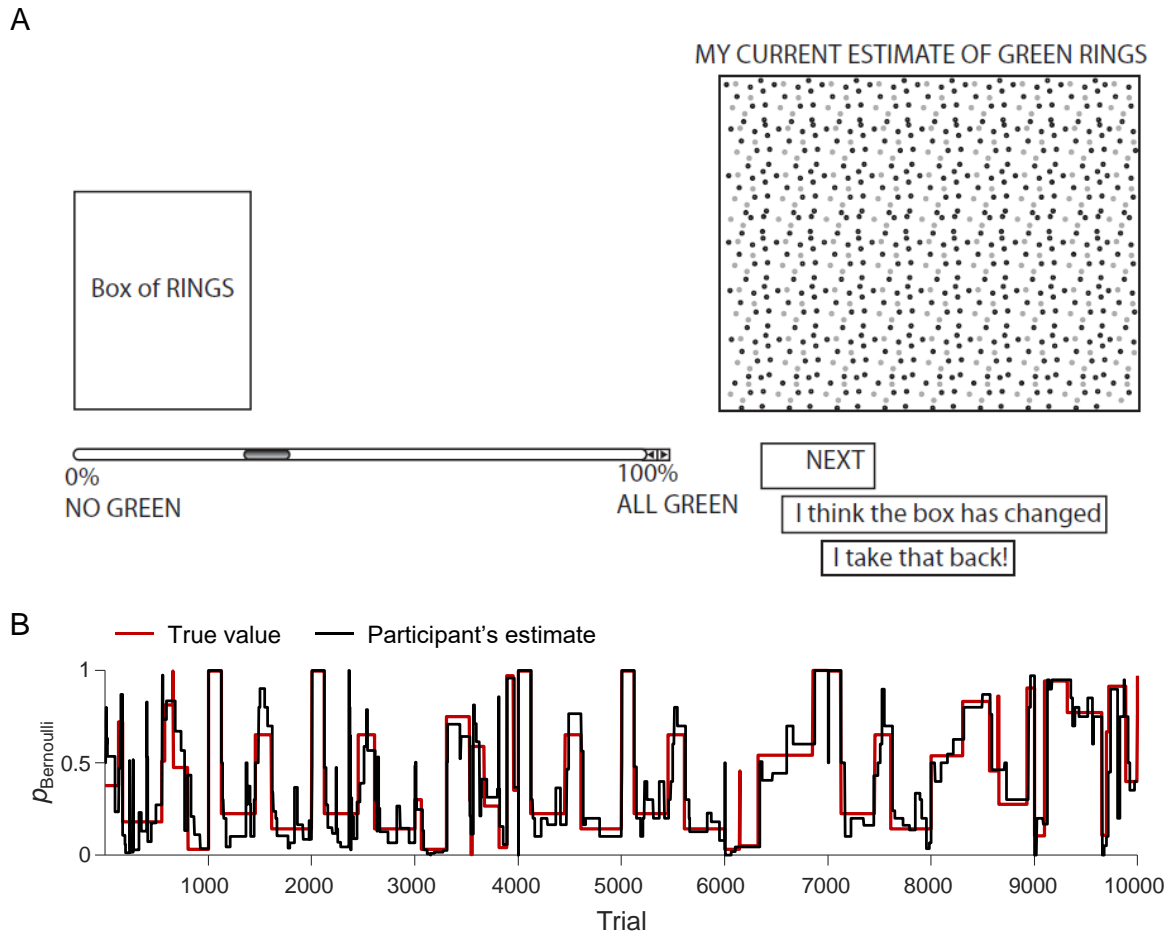

**Figure 1 | Experimental paradigm.** (A) Screenshot of the task in Gallistel et al (2014). Khaw, Stevens and Woodford (2017) and Ricci and Gallistel (2017) used a similar design but without buttons for reporting that the box has changed or second thoughts. From “The perception of probability,” by C. R. Gallistel, M. Krishan, Y. Liu, R. Miller and P. E. Latham, 2014, *Psychological review*, Vol. 121, p. 96-123. Copyright 2014 by American Psychological Association. Reprinted with permission. (B) Example of response data (black) in an experiment where the hidden Bernoulli probability (red) was non-stationary and stepwise (Participant 1 in Gallistel et al, 2014).

121

122

123 A defining feature of trial-by-trial learning mechanisms is that the internal beliefs are  
 124 updated each time a new data point is observed. One famous example is the delta learning rule  
 125 which was introduced by Widrow and Hoff (1960) as an algorithm for updating the weights of  
 126 nodes in a connectionist network (see Widrow & Lehr, 1993, for a review). In psychology, the  
 127 most famous model based on this rule is the Rescorla-Wagner model of classical conditioning  
 128 (Rescorla & Wagner, 1972), but it has also been adopted in many other domains (Behrens et  
 129 al., 2007; Busemeyer & Myung, 1988; Neal & Dayan, 1997; Verguts & Van Opstal, 2014).

130 In the context of probability estimation, delta-rule learning can be implemented as

131  $\hat{p}_t = (1 - \gamma) \hat{p}_{t-1} + \gamma \delta_{t-1}$ , where  $\hat{p}_t$  is the probability estimate at time  $t$ ,  $\hat{p}_{t-1}$  the previous estimate,

132  $\delta_{t-1} = 1 - X_t$  the prediction error at time point  $t-1$ , and  $\gamma$  the learning rate. The delta-rule

133 accordingly abstracts an online running estimate of the underlying probability and it has the  
134 advantage of being recursive: it operates without requiring access to memories going back  
135 further than the latest observation.

136 By contrast, hypothesis-testing models assume that people learn about the world by  
137 testing between explicit hypotheses about the state of the world based on confirming or  
138 disconfirming feedback (Brehmer, 1974; Bruner et al., 1956). A defining feature of these  
139 models is that beliefs are updated in a discrete rather than gradual fashion, because observers  
140 hold on to a belief until sufficiently strong evidence has accumulated against it. Hypothesis  
141 testing models have been applied to, for example, research on reasoning (e.g. Klayman & Ha,  
142 1987; Oaksford & Chater, 1994; Wason & Johnson-Laird, 1970), categorisation (Ashby &  
143 Valentin, 2017; Bruner et al., 1956), and function learning (Brehmer, 1974, 1980). Because a  
144 single data point typically provides little evidence about a hypothesis, these models predict that  
145 beliefs may sometimes stay unchanged over many outcome observations. Gallistel et al. (2014)  
146 formalised a hypothesis-testing model for the learning of non-stationary probabilities, which  
147 they called the “If it ain’t broke, don’t fix it” (IIAB) model. According to this model,  
148 participants assess after each new observation whether their current belief is “broke” and only  
149 update it if the answer is in the affirmative. The suggestion is that humans do not learn  
150 probabilities directly: they learn “change points” in the hidden Bernoulli parameter and use this  
151 information and memories of previous outcomes to infer probabilities.

152

### 153 **Empirical Phenomena Related to Human Estimation of Non-Stationary Probabilities**

154 To evaluate the plausibility of these two classes of models under non-stationary  
155 probabilities, Gallistel et al. (2014) identified a number of important empirical phenomena that  
156 any serious model should be able to reproduce. Table 1 provides an overview of these  
157 phenomena, which we divide into two categories: those related to slider updates and those  
158 related to participants’ conceptions of the generative function (“higher-order” beliefs).

159 We identified an additional phenomenon that has not been reported before but may be  
160 informative about the underlying mechanisms: participants regularly make changes to the slider  
161 in the *opposite* direction of the colour of the last observation (e.g., decrease their estimate of  
162 the probability of a red outcome after observing a red outcome). In the three datasets considered  
163 in the present study,  $23.6 \pm 1.6\%$  ( $M \pm SE$  across participants) of the updates were of this nature.  
164 This phenomenon is unexpected under both the IIAB model and standard trial-by-trial models.

165 Two of the phenomena (10 & 11) cannot be explained by either the proposed hypothesis  
166 testing model or a regular trial-by-trial model as specified here. We believe they could do so

167 with certain extensions, which we will come back to in the Discussion. Since these phenomena  
 168 are a shared issue, and thus not diagnostic of the learning mechanisms that we are contrasting  
 169 here, we will not consider them in our evaluations of the models.

170

171 Table 1.

172 *Empirical phenomena observed in the probability tracking task with the mechanisms of the*  
 173 *IIAB and the proposed mechanisms of our extended delta-rule that explain them. All*  
 174 *phenomena reported by Gallistel et al. (2014) unless indicated otherwise.*

| Empirical phenomenon                                                         | Mechanism to explain the phenomenon                                                                                                                                                                                                   |                                                                                                                                                                                          |
|------------------------------------------------------------------------------|---------------------------------------------------------------------------------------------------------------------------------------------------------------------------------------------------------------------------------------|------------------------------------------------------------------------------------------------------------------------------------------------------------------------------------------|
|                                                                              | IIAB model                                                                                                                                                                                                                            | Delta-rule model                                                                                                                                                                         |
| Related to slider updates                                                    |                                                                                                                                                                                                                                       |                                                                                                                                                                                          |
| 1. <i>Stepwise updating of reported estimates of the tracked probability</i> | Slider updates follow belief updates, which only happen when there is sufficient evidence against the present hypothesis.                                                                                                             | Beliefs are updated on each trial, but they are accompanied by a slider update only when the discrepancy between the current belief and the slider value exceeds the response threshold. |
| 2. <i>Unimodal step height distributions</i>                                 | Small adjustments happen when the current hypothesis is refined in the troubleshooting stage or when a new hypothesis is close to the present one. Large updates happen when a new hypothesis is very different from the present one. | The response threshold varies across trials. Small slider updates happen when the response threshold is low; large ones may happen when the response threshold is high.                  |
| 3. <i>Rapid adjustment to changes</i> (*)                                    | A sufficiently low threshold on hypothesis updating.                                                                                                                                                                                  | A sufficiently low response threshold on initiating a slider update.                                                                                                                     |
| 4. <i>Median response close to true p</i>                                    | Maximum-likelihood updating of the internal estimate of the tracked probability.                                                                                                                                                      | Gradient descent updating of the internal estimate of the tracked probability.                                                                                                           |
| 5. <i>Inconsistent updating (present paper)</i>                              | Unexplained by the original model but can be accounted for by adding a variable response threshold.                                                                                                                                   | Accounted for by the variable response threshold.                                                                                                                                        |
| Related to conception of generative function                                 | IIAB model                                                                                                                                                                                                                            | Delta-rule model combined with a drift diffusion mechanism                                                                                                                               |
| 6. <i>Rapid detection of change points</i>                                   | A sufficiently low decision threshold during hypothesis testing (see Phenomenon 3).                                                                                                                                                   | A sufficiently low bound in the drift-to-bound change detection mechanism.                                                                                                               |
| 7. <i>High hit rates on change-point reports</i>                             | A consequence of “rapid adjustment to changes”.                                                                                                                                                                                       | A consequence of “rapid adjustment to changes”.                                                                                                                                          |



|                                                                                                |                                                                                                                           |                                                                                                                                                                    |
|------------------------------------------------------------------------------------------------|---------------------------------------------------------------------------------------------------------------------------|--------------------------------------------------------------------------------------------------------------------------------------------------------------------|
| 8. <i>High false discovery rates on change-point reports (**)</i>                              | A consequence of “rapid adjustment to changes”.                                                                           | A consequence of “rapid adjustment to changes”.                                                                                                                    |
| 9. <i>Occasional changes of mind about the last reported change point (“I take that back”)</i> | Incongruent observations are better described by expunging the last change point.                                         | Large prediction errors in the direction opposite to the most recently reported change point are interpreted as evidence that there was no change point after all. |
| 10. <i>The average rate at which changes are reported decreases over time</i>                  | Unexplained by the original model. Can be explained by modifying priors but at the expense of explaining other phenomena. | Unexplained by our version but explained by previous literature. Participants update their decision bound separation through learning.                             |
| 11. <i>Declarative perception of periodicity (Ricci and Gallistel, 2017)</i>                   | Unexplained by the original IIAB model, but can be accounted for by adding a separate function learning process.          | Unexplained by the original delta-rule model, but can be accounted for by adding a separate function learning process.                                             |

175 (\*) Gallistel et al. (2014) refer to observations of adjustments of the response shortly after a change point as  
 176 “rapid *detection* of changes” (emphasis added). We use the phrase “rapid *adjustment*” to avoid conflation of this  
 177 phenomenon and high hit rates, which refers to the observation of participants clicking “I think the box has  
 178 changed” after a change point.

179 (\*\*) Gallistel et al. (2014) reported “high hit rates and low false-alarm rates”. However, while they calculated the  
 180 hit rate as reports of a change point in the interval between two change points divided by the number of change  
 181 points (event level definition), the false alarm rate was calculated as the number of change point reports on trials  
 182 without a change point divided by the total number of trials without a change point (trial level definition). When  
 183 using an event-level definition for both metrics, only the hit rate is high and the false-alarm rate is (trivially)  
 184 close to zero. In this task, we believe it is more informative to look at the false-discovery rate: the number of  
 185 false alarms divided by the total number of change reports.

186

## 187 **The Main Arguments Against Trial-by-Trial Estimation Models**

188 Gallistel et al. (2014) argue that trial-by-trial models are unable to account for several of  
 189 the phenomena listed above. The first one is the stepwise manner in which participants tend to  
 190 adjust their estimates of tracked probabilities: they often leave the slider unchanged for long  
 191 periods of time (Figure 1B), which seems in direct contradiction with any model that updates  
 192 on a trial-by-trial basis. An additional and closely related argument against those models is  
 193 based on the distribution of adjustment sizes. Besides making many small adjustments,  
 194 participants also regularly make large adjustments. Large adjustments are hard to reconcile with  
 195 the idea of gradual, trial-by-trial updating, because a single observation rarely causes a large



196 change in the estimated probability. Gallistel et al. (2014) argue that large adjustments and  
197 periods of constancy instead reflect discrete belief changes.

198 One potential way to make a trial-by-trial model account both for large slider adjustments  
199 and periods with no adjustment is to assume that participants have a “response threshold” that  
200 prevents them from making slider updates when the difference between the current slider value  
201 and their internal belief is not sufficiently large to justify the effort. Such a threshold could  
202 reflect simple “laziness” (recall that they typically performed thousands of trials) or have a  
203 more sophisticated basis. While this kind of model produces stepwise response behaviour, it  
204 has another problem: it is unable to explain adjustments smaller than the response threshold.  
205 As noted by Gallistel et al. (2014), a potential remedy is to make one further assumption,  
206 namely that the response threshold can vary across trials. This variability could reflect, for  
207 example, fluctuations in attention and motivation, or noise in neural and cognitive processing  
208 (Drugowitsch et al., 2016; Faisal et al., 2008). A more sophisticated proposal is that the variable  
209 threshold reflects a rational process in which participants trade off costs related to moving the  
210 mouse and cognitive processing against accuracy in task performance (Khaw et al., 2017).  
211 Gallistel et al. (2014) inspected the behaviour of a trial-by-trial model with a variable response  
212 threshold through simulations but were unable to find parameter settings that produced step  
213 height distributions resembling the empirically observed distributions. Importantly, however,  
214 they seem to have done this by manually trying out a number of different parameter settings,  
215 rather than by exploring the space exhaustively. In the present paper, we perform a more  
216 systematic search and show that a delta-rule model with a variable response threshold does, in  
217 fact, accurately reproduce the empirical distributions.

218 Another major argument that Gallistel et al. (2014) make against trial-by-trial updating  
219 models is based on their observation that participants are able to detect changes in the Bernoulli  
220 parameter (Phenomena 6-9 in Table 1). They demonstrated this using a version of the task  
221 where participants were asked to press an “I think the box has changed” button whenever they  
222 thought that there had been a change in the generative process (see Figure 1A). Some of these  
223 participants were also given the option to report “seconds thoughts” about those reports by  
224 pushing a button labelled “I take that back.” (Figure 1A). Gallistel et al. (2014) interpret the  
225 ability to detect and reconsider changes as evidence that participants store a record of the  
226 previous change points in memory, over and above a summary representation of the outcomes  
227 thus far observed. They argue that such a record is incompatible with trial-by-trial estimation  
228 models, which have a much more condensed knowledge state. Here, we show that a delta-rule  
229 model extended with a standard drift-to-bound mechanism tracks changes in the underlying

230 Bernoulli parameter and can account for human reports of and second thoughts about such  
231 changes.

232 Based mainly on the above arguments, Gallistel et al. (2014) ruled out the entire class  
233 of trial-by-trial estimation models as a possible explanation for human behaviour on probability  
234 estimation tasks. They argued that one instead needs a model with the conceptual richness of a  
235 hypothesis testing, “troubleshooting” process that identifies the most likely state of the world  
236 to have produced the data. They proposed such a model under the name “If It Ain’t Broke don’t  
237 fix it” (IIAB, described in more detail later) and used simulations to show that there are  
238 parameter settings that produce qualitatively similar data patterns as the phenomena observed  
239 in human data. Importantly, however, they did not fit the model to any data and they did not  
240 perform any quantitative model comparison against alternative models.

241

## 242 **Outline of this paper**

243 Gallistel et al. (2014) argued that trial-by-trial estimation models are qualitatively incompatible  
244 with human estimation of non-stationary probabilities. This paper presents a re-evaluation of  
245 that claim and an extension of their analyses. In the next section, we present the two main  
246 contending models: the IIAB hypothesis-testing model proposed by Gallistel et al. (2014) and  
247 a trial-by-trial estimation model based on delta-rule learning. Thereafter, we use simulations to  
248 examine whether the delta-rule model can reproduce the most important qualitative aspects of  
249 human data. Unlike Gallistel et al. (2014), we find that it accurately reproduces those patterns.  
250 Having established that there are no qualitative reasons to rule out the delta-rule model, we next  
251 examine how well both models account for actual data by fitting them to data from the three  
252 previous studies. We find that both models account well for most of the data, even though  
253 formal model comparison clearly favours the trial-by-trial model over the IIAB model for  
254 almost every participant. To paraphrase Mark Twain (White, 1897), our results indicate that the  
255 report of the death of trial-by-trial estimation models was an exaggeration.

256

## 257 **MODELS**

258

### 259 **The IIAB model**

260 We provide a brief description of the “If It Ain’t Broke, don’t fix it” (IIAB) model here and  
261 refer the reader to Gallistel et al. (2014) for a more complete exposition and mathematical  
262 details. A key characteristic of this model is that it has a relatively stable internal belief about  
263 the tracked probability: it only updates this belief when there is sufficient evidence against the

264 current value. It proceeds in two stages. In the first stage, it tests whether the currently held  
265 belief about the tracked probability is “broke”. This test is performed by computing the  
266 discrepancy between the belief and the outcomes observed since the last registered change  
267 point. If the discrepancy – measured as Kullback-Leibler divergence – exceeds a decision  
268 threshold  $T_1$ , it is concluded that something is “broke”. Each time this happens, the model enters  
269 a “troubleshooting” stage, in which it considers three hypotheses on why the current estimate  
270 may be “broke”: (i) there was a change in the generative process (“I think the box has  
271 changed”), in which case the model will register a new change point and update its estimate of  
272  $p_{\text{true}}$  accordingly; (ii) the previously registered change point was a mistake (“I take that back”),  
273 in which case the model will expunge the last recorded change point and update its estimate  
274 accordingly; (iii) the previous estimate of  $p_{\text{true}}$  was wrong but the change point record is correct,  
275 in which case the model will update its estimate of  $p_{\text{true}}$  but not register or expunge any change  
276 point. Hypothesis (iii) corresponds to concluding that the estimate was “broke” due to sampling  
277 error, but it is not assumed that such beliefs are recorded in memory. Gallistel et al. (2014)  
278 argue that these “troubleshooting” steps allow the IIAB model to explain behavioural  
279 phenomena related to the participant’s knowledge about the generative function (phenomena  
280 6-11 in Table 1). Since the updated estimate is always the average of all observations since the  
281 last believed change point, the model must retain the full sequence of observations since the  
282 second to last change point.

283 The original version of the IIAB model has just two parameters: threshold  $T_1$  mentioned  
284 above and an additional threshold  $T_2$  that is used in the troubleshooting stage. While both  
285 thresholds are fixed, the evidence in the first stage is scaled by the number of trials since the  
286 last change (the sample size). The IIAB model will therefore become increasingly sensitive to  
287 small discrepancies between the current belief and the most recently observed evidence when  
288 no change point has been detected for a while.

289 Predictions related to slider updates can be derived directly from the model’s internal  
290 belief state about the tracked probability. Predictions related to a participant’s reports of  
291 suspected changes in the generative process and changes of mind about those reports can be  
292 derived directly from the model’s “troubleshooting” stage. Hence, this is a rich model that  
293 makes predictions about all of the empirical phenomena listed in Table 1 except 11.

294

### 295 **The delta-rule model**

296 In contrast to the IIAB model delta-rule models update the estimate after *every* new observation.  
297 The most basic version of the delta-rule model does this using a recursive function of the form

$$298 \quad \hat{p}_{B,t} = (1 - \lambda) \hat{p}_{B,t-1} + \lambda E_t, \quad (1)$$

299 where  $\hat{p}_{B,t}$  is the estimated probability of the tracked event (in this case: of observing a green  
300 ring) on trial  $t$ ,  $E_t = \hat{p}_{B,t-1} - X_t$  is the *prediction error*, and  $\lambda \in [0,1]$  is the *learning rate*. This  
301 model thus proceeds by constantly adjusting its estimate of the tracked probability in the  
302 direction of the latest observed outcome: seeing a green ring slightly increases the observer's  
303 estimate of the proportion of green rings in the box and seeing a red one decreases it. The higher  
304 the value of the learning rate,  $\lambda$ , the larger the trial-by-trial adjustments. In environments with  
305 frequent, abrupt changes in the generative process, it is beneficial to have a high learning rate  
306 because that will allow the model to catch up quickly to those changes. By contrast, in stable  
307 or very slowly changing environments it is better to have a slow learning rate, to avoid the  
308 estimates being overly sensitive to occasional unexpected outcomes. The environments used in  
309 previous studies on non-stationary probability tracking (Gallistel et al., 2014; Khaw et al., 2017;  
310 Nassar et al., 2010; Norton et al., 2019) are often a mixture of those two situations: long periods  
311 of stability with occasional, abrupt changes (Figure 1B). In such environments, it can be a  
312 disadvantage to have a single, fixed learning rate. Several modifications to the standard delta-  
313 rule model have been proposed that might work better in mixed environments, for example the  
314 addition of a second kernel (Gallistel et al., 2014) and the use of a dynamic learning rate (Nassar  
315 et al., 2010). However, it has been shown in a similar task that the basic model typically  
316 performs as well as or even better than more complex alternatives (Norton et al., 2019). While  
317 we will consider two variants later (see Results), our main focus will be on the most basic,  
318 single-parameter version of the delta-rule, as specified by Equation (1).

319

### 320 **The cumulative prediction error as a predictor of changes in the generative process**

321 Gallistel et al. (2014) rightly point out that the delta-rule by itself cannot account for participant  
322 data related to explicit change point reports (phenomena 6-9 in Table 1). This is not surprising  
323 since the delta rule is a learning mechanism. To explain change point reports, it needs to be  
324 combined with a decision-making mechanism. One of the most established decision-making  
325 mechanisms to date is the drift-diffusion mechanism (Bogacz et al., 2006; Ditterich, 2006;  
326 Ratcliff, 1978), which finds broad support in behavioural, neurophysiological, and  
327 computational studies (Ratcliff, 1978; Ratcliff et al., 2016; Wagenmakers, 2009). Here, we will  
328 explore if it can also explain change point reports in probability estimation tasks.

329           A central quantity in delta-rule models is the trial-by-trial prediction error, that is, the  
330 difference between the predicted and observed outcome. When the generative process is stable  
331 and the observer’s estimate has homed in on a value close to the true value of the tracked  
332 variable, prediction errors tend to cancel each other out over trials (Figure 2, first 100 trials).  
333 After an abrupt change in the generative process (Figure 2, trial 100), however, there will  
334 typically be a burst of relatively large prediction errors with a sign that indicates the direction  
335 of the change. Hence, the cumulative prediction error is indicative of changes in the generative  
336 process: a value close to zero suggests a stable process; a large negative value suggests that  
337 there was a recent increase in the Bernoulli parameter; a large positive value suggests that there  
338 was a recent decrease in the Bernoulli parameter. Because of its diagnostic value, observers  
339 could use the cumulative prediction error to detect changes in the generative process when  
340 tasked to do so. This can be modelled by adding a standard drift-to-bound accumulator to the  
341 model and let it trigger an “I think the box has changed” response whenever the cumulative  
342 prediction error exceeds a decision bound (Figure 2). Fully in line with the philosophy of delta-  
343 rule models, this cumulative error can be updated recursively and imposes negligible memory  
344 requirements.

345           Importantly, drift-diffusion mechanisms can also explain “second thoughts”, which are  
346 known as “changes of mind” in the decision-making literature. This is done by introducing a  
347 temporary second bound at the moment that an initial decision has been made (e.g., Resulaj,  
348 Kiani, Wolpert, & Shadlen, 2009; Van den Berg et al., 2016). This bound will be crossed if the  
349 immediate post-decision information is sufficiently inconsistent with the original decision,  
350 triggering a change-of-mind response. A typical way to implement this bound is to use two  
351 parameters, specifying its height and lifetime. Because we have very little data on changes of  
352 mind (115 reports by 5 participants in a total of 50,000 trials), we take a simpler approach by  
353 setting the change-of-mind bound equal to the original bound but in the opposite direction of  
354 the detected change point, such that the lifetime of the bound is the only additional parameter  
355 required to model these rare responses.

356

### 357 **Response threshold**

358           Previous studies (Gallistel et al., 2014; Khaw et al., 2017; Robinson, 1964) have  
359 considered the possibility that participants do not adjust the slider when the difference to their

360 internal belief is too small. This could arise from participants economising their time costs<sup>1</sup>.  
361 Additionally, cognitive processes are noisy (Drugowitsch et al., 2016; Faisal et al., 2008) and  
362 participants' levels of motivation and attention might fluctuate over time, why the discrepancy  
363 required for an update may vary. We will first model this as in Gallistel et al. (2014): as a  
364 threshold value for the required discrepancy drawn from a constrained Gaussian distribution.  
365 We will then test models where the threshold is drawn from a beta distribution. We parameterise  
366 both thresholds by their mean and variance.  
367  
368

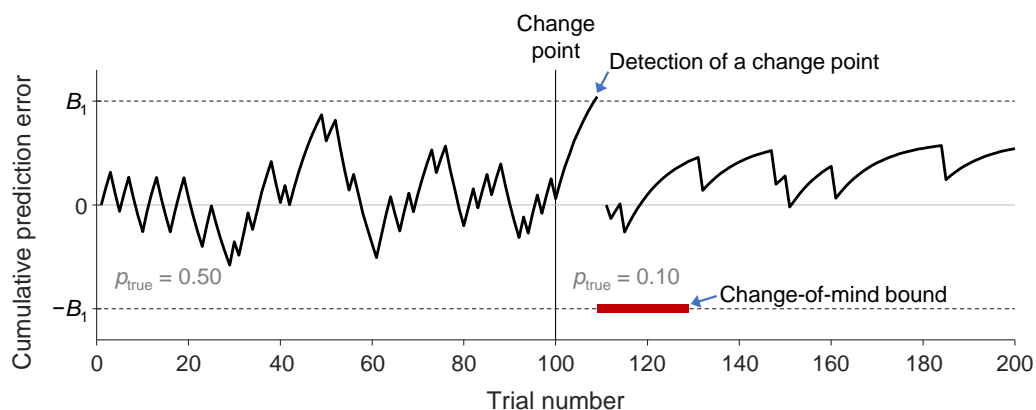

**Figure 2 | A proposed mechanism to detect changes in a Bernoulli process based on accumulation of prediction errors.** Simulation of the cumulative prediction error in a delta-rule model with a learning rate of 0.10. The true value of the Bernoulli parameter is 0.50 for the first 99 trials and then abruptly changes to 0.10. Before the change, the cumulative prediction error hovers around 0, because positive and negative errors cancel each other out. At around trial 50 there is almost a false alarm. Immediately after the change, the cumulative prediction error quickly increases, because more positive estimation errors are experienced than negative ones. The cumulative prediction error hits decision bound  $B_1=3.0$  at trial 109 which triggers an “I think the box has changed” response, resets the cumulative prediction error to 0, and instates a temporary change-of-mind bound (which is not being crossed in this example). The shape of the cumulative prediction error looks different after the change, because after the model has learned the new value of  $p_{\text{true}}$ , the trial-by-trial prediction errors are 0.10 (on 90% of the trials) and  $-0.90$  (on 10% of the trials) while they were  $-0.50$  and  $0.50$  (in 50% of the trials each) before the change.

369  
370

### 371 **Response noise and lapse rate**

372 To account for inaccuracies in predicted slider settings – due to factors such as motor  
373 noise and model mismatch – we included response noise in all models. This noise was  
374 implemented as a beta distribution centred on the model's predicted response,  $m$ , and was

---

<sup>1</sup> For example, in the experiment by Gallistel et al. (2014), trials with an update took on average three times longer ( $4.22 \pm 0.18$  seconds) than trials without an update ( $1.39 \pm 0.01$  seconds). Responding on each trial would almost have tripled the median session time – from around 25 minutes to around 70 minutes.



375 applied to trials on which a slider update was predicted. Since the variance of the beta  
376 distribution has an upper bound (equal to  $m - m^2$ ), we parameterised it as a relative value  
377 between 0 (no variance) and 1 (maximum variance). The (relative) variance was fitted as a free  
378 parameter. Moreover, we included a small lapse rate (1/1000) to account for lapses in attention  
379 and to avoid numerical instabilities in model variants without any other sources of stochasticity  
380 (such as the original IIAB model).

381

## 382 **RESULTS**

383 This section consists of two parts. First, following the approach by Gallistel et al. (2014), we  
384 perform simulations to re-assess the conclusion that a delta-rule model cannot reproduce the  
385 main qualitative phenomena observed in human data (Table 1). Next, we perform a likelihood-  
386 based model comparison in which we quantitatively compare this model to the main contender,  
387 the IIAB model. Thereafter, we inspect the likelihood-based model fits in greater detail and test  
388 two alternative models from the literature.

389

### 390 **Reassessment of the conclusion that delta-rule model predictions are qualitatively** 391 **inconsistent with data**

392 The simulation results by Gallistel et al. (2014) suggested that delta-rule estimation  
393 models are unable to produce slider updates that are qualitatively similar to human behaviour.  
394 In particular, they were unable to find parameter settings that reproduced the distributions of  
395 step widths and step heights observed in human data (phenomena 1-3 in Table 1) and concluded  
396 that trial-by-trial models are, therefore, fundamentally unfit to account for human estimation of  
397 non-stationary probabilities. Here, we reconsider this finding by using an approach that differs  
398 from theirs in an important way: instead of manually trying out parameter settings, we  
399 systematically explore parameter space using an optimisation method. Specifically, we let the  
400 algorithm search for the setting that minimises the root mean squared deviation (RMSD)  
401 between the data and the model prediction for the summary statistic of interest (histograms of  
402 step width and height, cumulative number of updates, etc).

403 In this analysis, we use the exact same delta-rule model as tested by Gallistel et al. (2014),  
404 which has three parameters: the learning rate ( $\lambda$ ), the mean of the (Gaussian) response threshold  
405 distribution ( $\mu_\tau$ ), and the coefficient of variation of this distribution ( $c\nu_\tau$ ); no response noise or  
406 lapse rate was included in the model at this stage. Just like Gallistel et al. (2014), we constrain  
407  $c\nu_\tau$  to have a maximum value of 0.33. In contrast to their findings, we find that this model  
408 reproduces the step width and step height distributions very well (Figure 3). It also does an



409 excellent job in reproducing the other phenomena related to slider updates: the cumulative  
 410 number of updates, the median response values, and the cumulative distribution of the latency  
 411 between changes in the Bernoulli parameter and the next slider update.

412

413

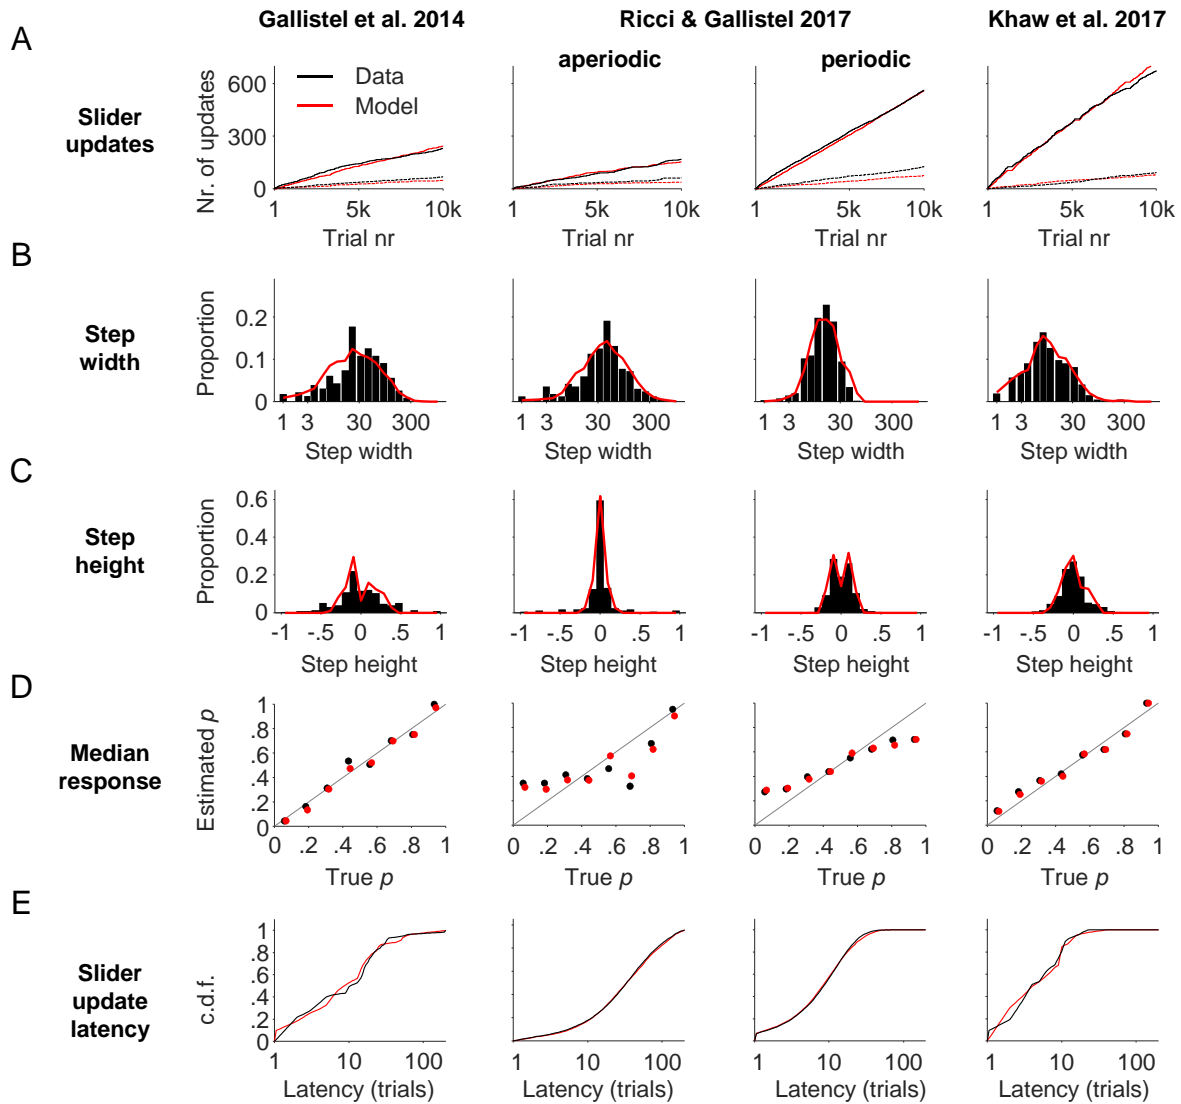

**Figure 3 | Evaluation of qualitative predictions by the delta-rule model related to slider settings.** Results are shown for Participant 1 in each of the 4 analyzed datasets. The model simulations results (red) were obtained by minimizing the root mean squared deviation (RMSD) with the data (black). (A) Total number of slider updates (solid) and number of inconsistent slider updates (dashed) as a function of trial number. (B) Distribution of the number of trials between consecutive slider updates. (C) Distribution of the magnitude of slider updates on trials with an update. (D) Median estimate of the tracked probability versus the median true value. (E) Cumulative distribution of the number of trials between a change in  $p_{\text{true}}$  and the next slider update.

414

415

416 Next, we extend the model with a drift diffusion mechanism on the prediction error and  
 417 test if the resulting model can account for phenomena related to the conception of the generative  
 418 function (phenomena 6-9 in Table 1). We find that the model accurately reproduces these  
 419 phenomena too (Figure 4): the cumulative number of “I think the box has changed” responses;  
 420 the cumulative number of “I take that back” responses; the cumulative distribution of the  
 421 latency between a change in the generative function and the observer’s detection of the change;  
 422 the hit rates, false discovery rates, and false alarm rates of box-change detections.

423 In conclusion, the predictions of a delta-rule model combined with a standard evidence  
 424 accumulation mechanism are qualitatively consistent with human tracking and detection of  
 425 changes in the parameter underlying a Bernoulli process. This means that the main argument  
 426 that Gallistel et al. (2014) presented against trial-by-trial models does not hold and may stem  
 427 from an inexhaustive exploration of parameter space.

428  
 429  
 430

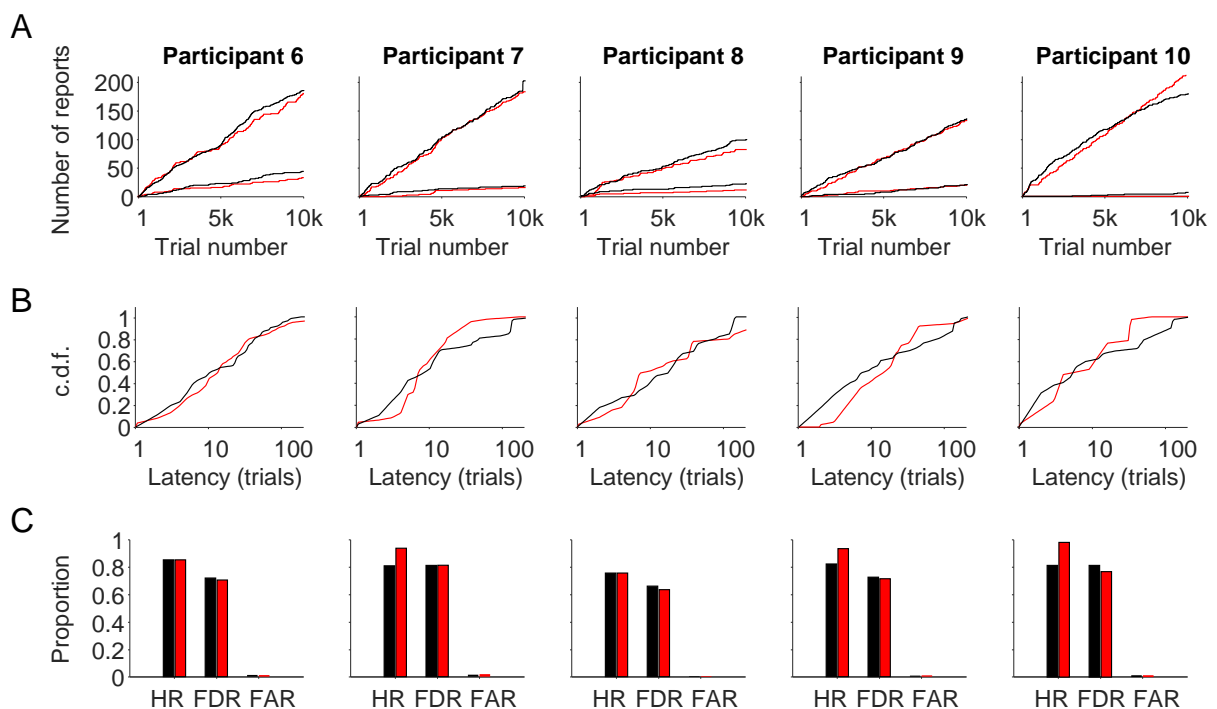

**Figure 4 | Evaluation of qualitative predictions by the delta-rule model related to detection of changes in the generative function (delta-rule model).** The model simulations results (red) were obtained by minimizing the root mean squared deviation (RMSD) with the data (black). (A) Total number of “I think the box has changed” reports (solid) and “I take that back” reports (dashed). (B) Cumulative distribution of the number of trials between a change in  $p_{\text{true}}$  and the next “I think the box has changed” report. (C) Hit rates, false discovery rates, and false alarm rates on change point detections.

431

## 432 **Likelihood-based model comparisons**

433         The results so far show that just like the IIAB model, the delta-rule model is capable of  
434 explaining previously established facts about human performance on probability tracking tasks.  
435 But which of the two models explains them *better*? Although the above approach of inspecting  
436 summary statistics is useful for checking if a model's predictions are qualitatively consistent  
437 with well-established facts, it cannot be used for quantitative model comparison. The main  
438 problem – as also noted by Gallistel et al. (2014) – is that there is no obvious way to weight  
439 misestimates in one summary statistic against misestimates in another, which makes it  
440 impossible to formulate a single measure to base judgements on.

441         To compare the models in a quantitative and more principled manner, we will next  
442 evaluate them based on likelihoods computed from raw data (see Supplemental Materials for  
443 details). This method has two major advantages over evaluating models based on their predicted  
444 summary statistics. First, it is a much more stringent evaluation because it takes *all* aspects of  
445 the data into account and describes them using a *single* set of parameters. Second, it allows one  
446 to evaluate model performance using a single, formal measure, such as the Akaike Information  
447 Criterion (Akaike, 1974) or cross-validated log likelihoods.

448         We fit the models to the raw data from four experiments (Table 4) reported in the three  
449 previous studies<sup>2</sup>. In each experiment, the number of trials per participant varied from 9,000 to  
450 10,000 and were divided over 9 or 10 sessions. In total, the data consists of 286,890 trials  
451 performed by 29 participants over 287 sessions. All data can be found at <https://osf.io/zhv2r/>.  
452 We limit these analyses to the slider update data, because “I think the box has changed” and “I  
453 take that back” responses were collected for only 10 and 5 of the participants, respectively.

454         We first compare the two models contrasted in Gallistel et al. (2014): a single-kernel  
455 delta-rule model with a variable response threshold and the IIAB model. We fit the models to  
456 all sessions jointly, that is, with a single set of parameters per participant. The delta-rule model  
457 accounts for the data overwhelmingly better than the IIAB model (Figure 5A): for each of the  
458 29 participants, the delta-rule model is favoured over the IIAB model by a difference of at least  
459 18020 log likelihood points ( $M \pm SE: 28654 \pm 904$ )<sup>3</sup>. Hence, not only is the delta-rule model  
460 viable from a qualitative perspective, its quantitative account of the raw data is much better  
461 than that of the alternative model proposed by Gallistel et al. (2014).

---

<sup>2</sup> There is one other study using the same paradigm (Robinson, 1964), but it has no preserved record of the data known to us.

<sup>3</sup> When fitting the models separately to each session, the average difference is  $285 \pm 40$  in favour of the delta model. Considering that log likelihoods scale linearly with the number of trials, this difference is comparable to that obtained by fitting the full datasets.

462 **Table 4.** *Overview of Datasets Used to Evaluate the Models.*

| Exp. ID | Study                    | Underlying function    | Number of participants | Number of trials per participant | Number of trials per session | Total number of sessions |
|---------|--------------------------|------------------------|------------------------|----------------------------------|------------------------------|--------------------------|
| E1      | Gallistel et al. (2014)  | Stepwise               | 10                     | 10,000                           | 1,000                        | 100                      |
| E2      | Ricci & Gallistel (2017) | Continuous (aperiodic) | 5                      | 10,000                           | 1,000                        | 50                       |
| E3      | Ricci & Gallistel (2017) | Continuous (periodic)  | 3 <sup>4</sup>         | 9,000                            | 1,000                        | 27                       |
| E4      | Khaw et al. (2017)       | Stepwise               | 11                     | 9,990                            | 999                          | 110                      |

463

464

465 There are two major differences between the models that could explain the enormous  
466 difference in goodness of fit. First, they have different belief updating mechanisms: hypothesis  
467 testing in the IIAB model and trial-by-trial updating in the delta-rule model. Second, the delta-  
468 rule model includes a threshold on the slider updates. Hence, it could be that the IIAB model  
469 performs poorly not because of its assumptions about how people update their internal beliefs,  
470 but rather due to lacking a response threshold. To examine the evidence for the belief updating  
471 mechanisms specifically, one must equalise the models in terms of the assumption about the  
472 response threshold. Therefore, we next fit a variant of the IIAB model with the exact same  
473 response threshold mechanism as in the delta-rule model. This version has a much better  
474 goodness of fit, but it is still outperformed by the delta-rule model for 25 out of 29 participants,  
475 with an average log likelihood difference of  $271 \pm 44$  across all participants (Figure 5B). This  
476 dramatic change in the log likelihood difference suggests that a response threshold is of primary  
477 importance to quantitatively account for the data.

478 A response threshold can be implemented in many ways and which version is chosen can  
479 strongly affect the model fit (see Khaw et al., 2017). So far, we have followed Gallistel et al.  
480 (2014) by assuming a variable threshold in the shape of a Gaussian distribution with a constraint  
481 on the magnitude of the noise. We will now test an alternative version by making two changes.  
482 First, we remove the constraint on the amount of variance ( $cv_t \leq 0.33$ ) because its justification  
483 is unclear to us and it may have limited both models' ability to account for participants'

<sup>4</sup> This experiment had 4 subjects, but we suspect that for one of them the responses were flipped between two sessions. We excluded this subject from our analyses.

484 response behaviours. Indeed, for all but one of the participants we find that the fitted coefficient  
 485 of variation of the response threshold was at the maximum of 0.33. Second, we switch to a beta  
 486 distribution because, unlike the Gaussian distribution, it produces responses that are properly  
 487 bounded between 0 and 1. The goodness of fit increases substantially for both the IIAB and  
 488 delta-rule model, by  $650 \pm 130$  and  $495 \pm 121$  log likelihood points, respectively. The delta-  
 489 rule model still outperforms the IIAB model for 27 out of 29 participants, with an average  
 490 difference of  $125 \pm 20$  (Figure 5C).  
 491

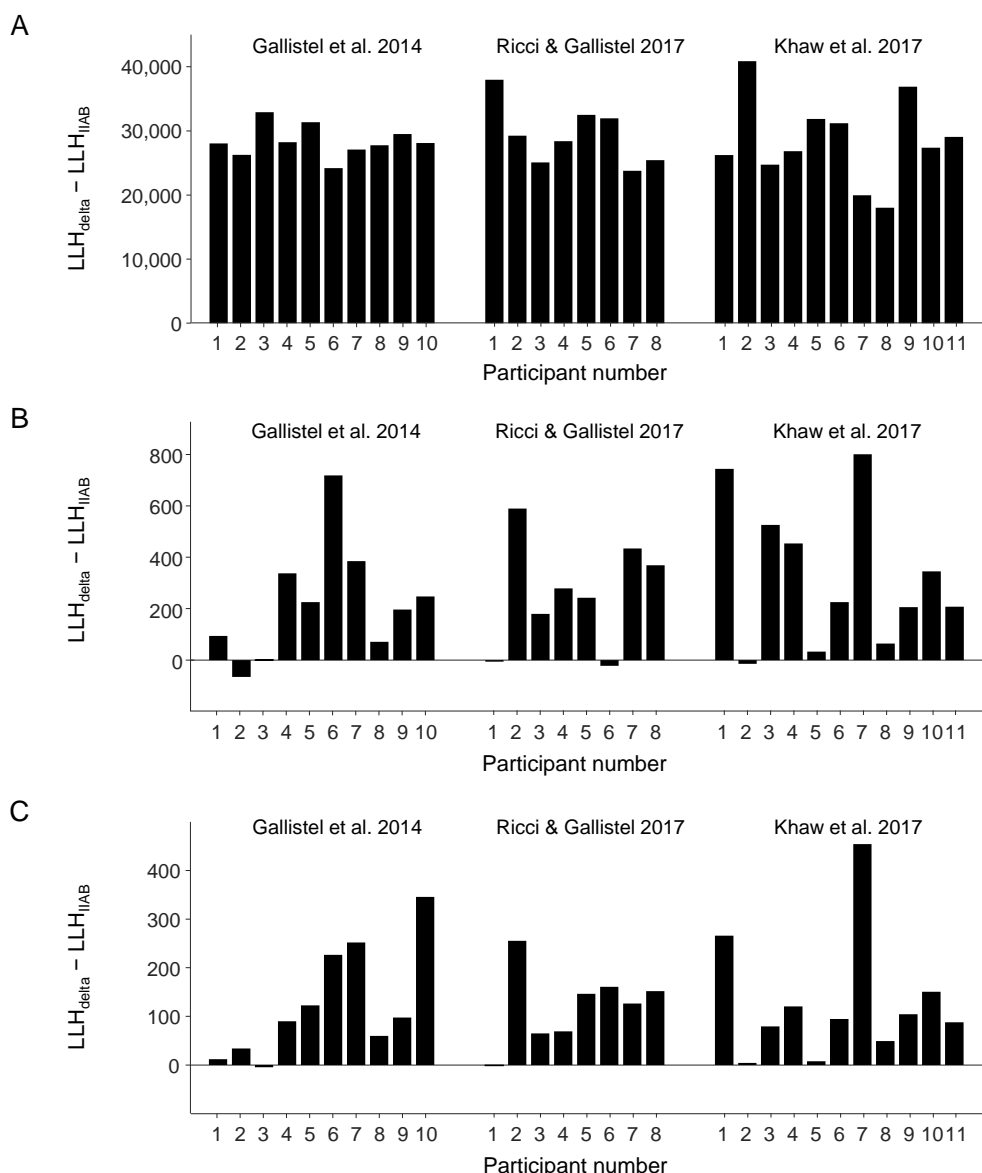

**Figure 5 | Model comparison results.** Model performance is expressed as the log likelihood of the delta-rule model ( $LLH_{\text{delta}}$ ) relative to that of the IIAB model ( $LLH_{\text{IIAB}}$ ). Positive numbers indicate a better fit for the delta-rule model. (A) A delta-rule model with a constrained Gaussian response threshold versus the original IIAB model (without a response threshold). (B) A delta-rule model with a constrained Gaussian response threshold versus an IIAB model with the same response threshold. (C) A delta-rule model with a beta-distributed response threshold versus an IIAB model with the same response threshold.

493 Altogether, these results show that from a quantitative model comparison perspective the delta-  
494 rule accounts better for the data than the IIAB model. We checked that this conclusion is robust  
495 to changes in the assumptions about the lapse rate and the response noise (see Supplemental  
496 Materials). Because the beta distribution provides a much better fit, we will employ it in the  
497 remaining analyses.

498

### 499 **Evaluation of qualitative phenomena under maximum-likelihood parameters**

500 Likelihood-based model comparison is a powerful tool to evaluate models against each  
501 other in a quantitative and principled way. However, results of such relative comparisons are  
502 of little value if none of the models provides a decent account of the data. To verify that this is  
503 not the case, we next examine the models' qualitative predictions under maximum-likelihood  
504 parameters. Using these parameter settings, the delta-rule model reproduces the qualitative  
505 phenomena related to slider settings almost as well as in the earlier RMSD-based fits (Figure  
506 6). Moreover, it also accounts well for the raw, trial-by-trial slider settings (Figure 7). The  
507 maximum-likelihood fits of the original IIAB model (i.e., without response threshold) are very  
508 poor (Figures S2 and S3 in Supplemental Materials). After adding a response threshold, the fits  
509 become visually of similar quality to those of the delta-rule model (Figures S4 and S5 in  
510 Supplemental Materials), which once again highlights that the assumption of a response  
511 threshold seems important to account for the data.

512

### 513 **Parameter estimates**

514 *Response threshold distributions in the delta-rule model.* Inspection of the maximum-  
515 likelihood estimates of the response thresholds suggests that there is large variation in the trial-  
516 to-trial thresholds (Figure 8). As a result, the choice of whether or not to update the slider on  
517 any given trial is only partially determined by the discrepancy between the internal belief and  
518 the current slider value. Previous literature (Biele et al., 2009; Gonzalez & Dutt, 2011) has  
519 suggested a completely discrepancy-independent mechanism called “inertia” where the  
520 decision to update is determined by the flip of a weighted coin. We tested this mechanism by  
521 replacing the response threshold with a constant probability of updating on each trial,  
522 implemented as a free parameter. This mechanism makes the fits substantially worse for 27 of  
523 the 29 participants, with an average of  $69 \pm 14$  log likelihood points over all participants. This  
524 suggests that the update decision at least in part depends on the discrepancy between the internal  
525 belief and the current slider value.

526

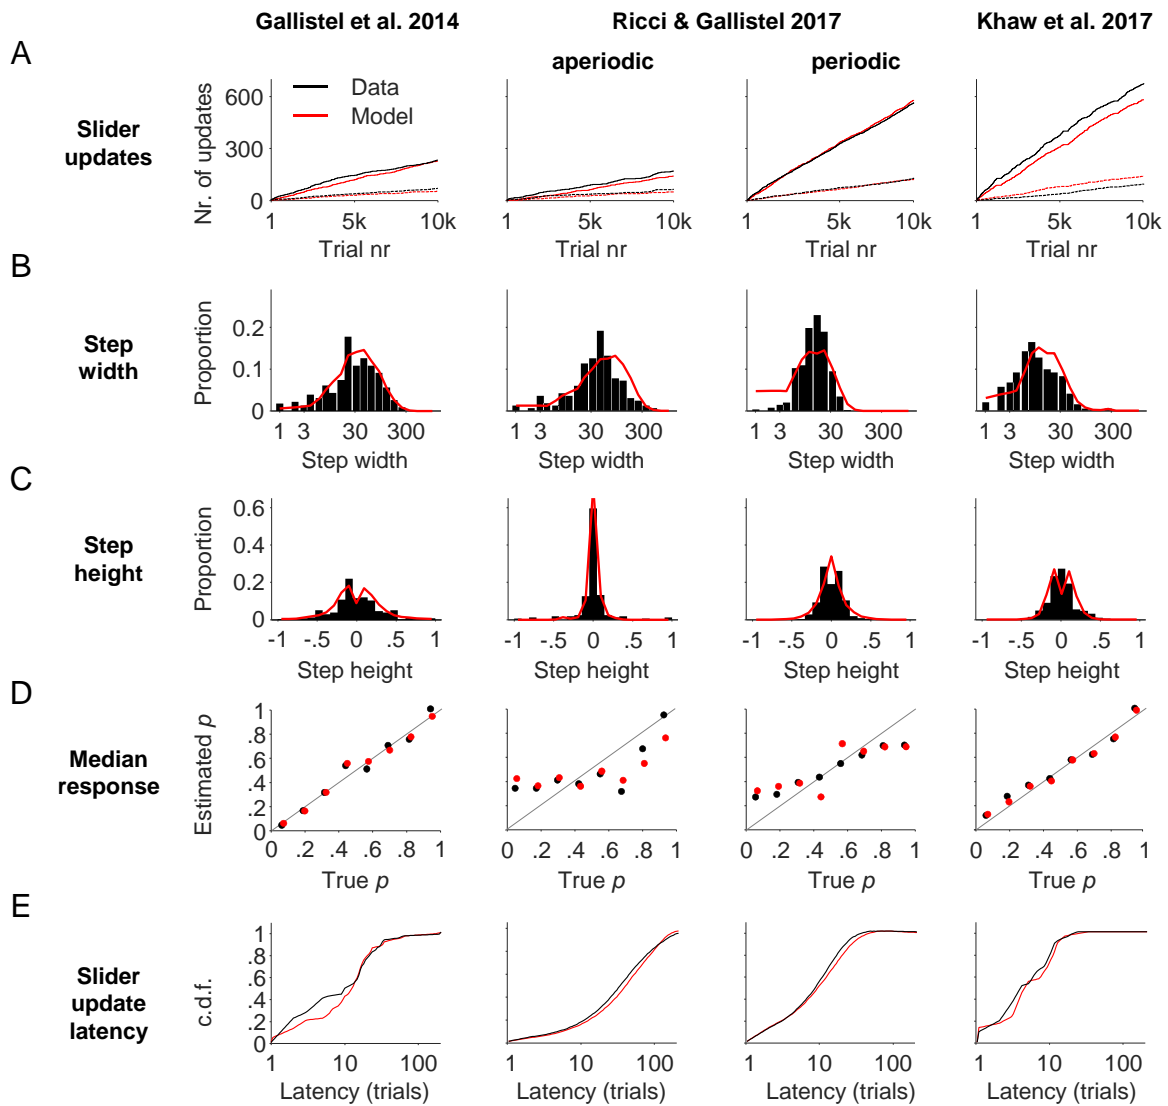

**Figure 6 | Delta-rule model behavior under maximum-likelihood parameter estimates.** Data (black) are shown for Participant 1 in each of the 4 analyzed datasets. The model predictions (red) were obtained by simulating responses using the maximum-likelihood estimates of the parameter values. (A) Total number of slider updates (solid) and number of inconsistent slider updates (dashed) as a function of trial number. (B) Distribution of the number of trials between consecutive slider updates. (C) Distribution of the magnitude of slider updates on trials with an update. (D) Median estimate of the tracked probability versus the median true value. (E) Cumulative distribution of the number of trials between a change in  $p_{\text{true}}$  and the next slider update.

527

528

529

530

531

532

533

534

*Response noise in the delta-rule model.* The median estimate of the (relative) variance of the beta response noise distribution is 0.058 (IQR: 0.041). To get an intuition of the magnitude of this noise, we performed a model simulation. Using each participants' maximum-likelihood parameter estimates, we computed the RMSD between predicted slider updates before and after adding response noise, in a fictitious experiment in which the tracked probability was uniformly distributed between 0 and 1. We find that the RMSD equals  $0.118 \pm 0.007$ . This seems



535 reasonable, because it is in the same order of magnitude but smaller than the (model-free)  
536 RMSD between the tracked probability and the actual participant responses ( $0.189 \pm 0.009$ ).  
537 Hence, the model assigns approximately half of the slider error magnitude to response noise.  
538  
539

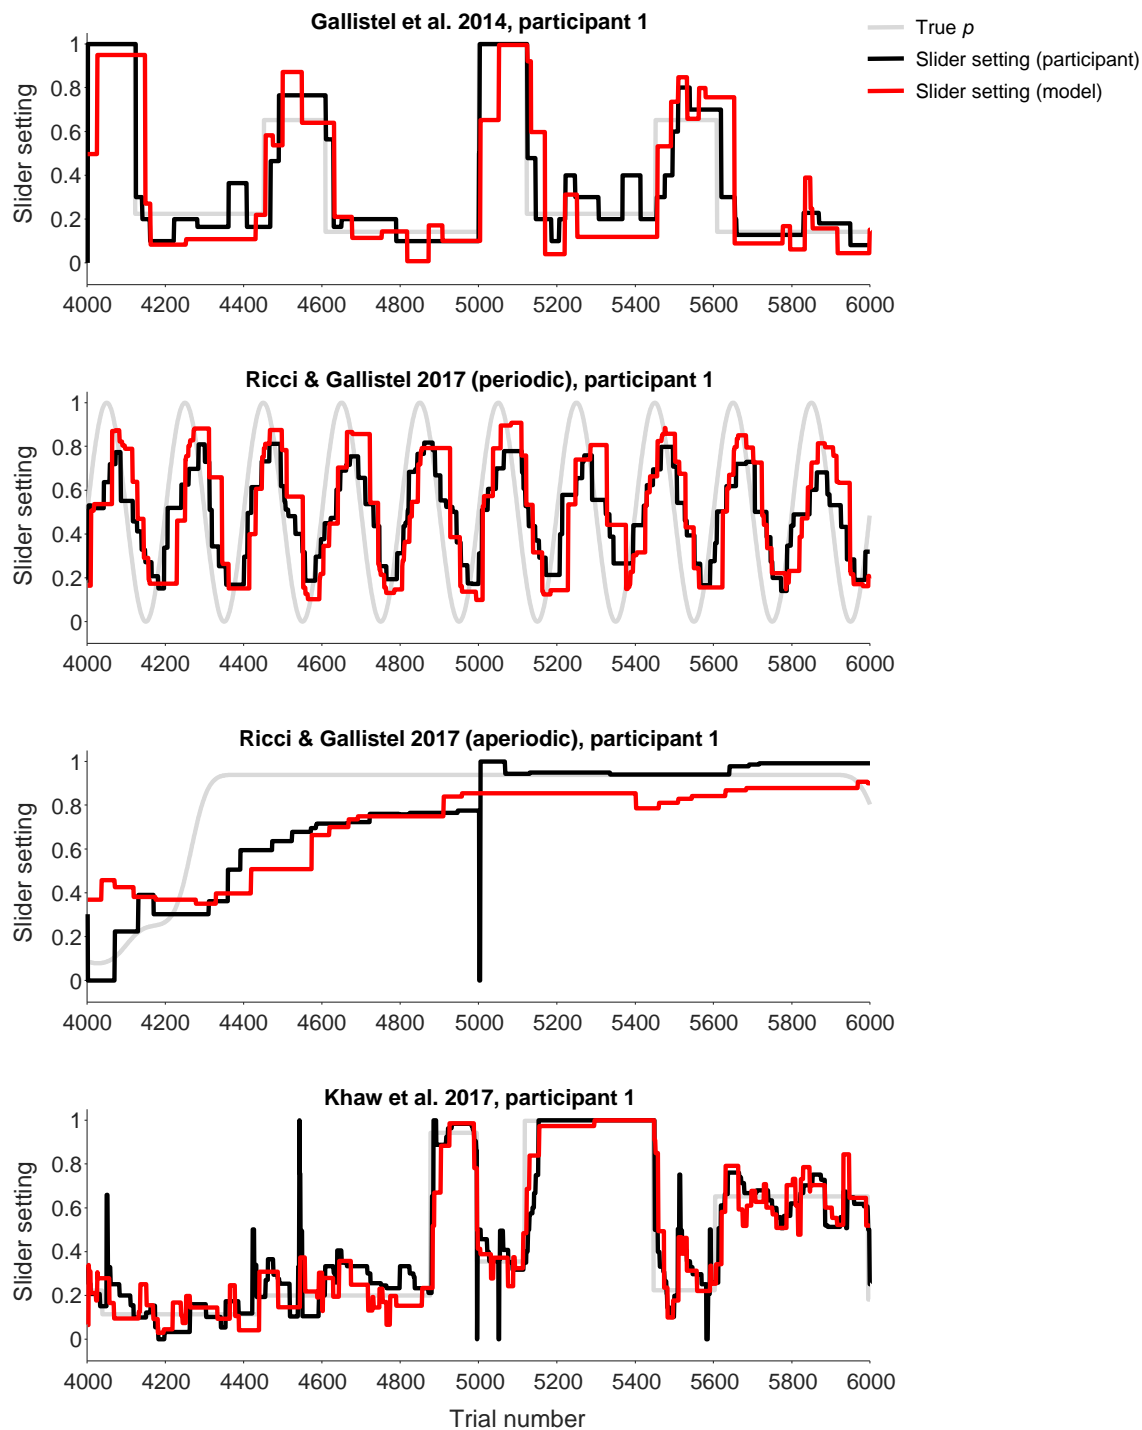

**Figure 7 | Examples of trial-by-trial slider settings of delta-rule model under maximum-likelihood parameter estimates.** For visualisation purposes, only the central 2,000 trials are shown for each dataset.

540

541 *Decision threshold in the IIAB model.* The decision threshold parameter in the IIAB  
542 model – which controls when the model considers the current belief to be “broke” and in need  
543 of an update – is estimated to be close to 0 for every participant ( $M=0.032$ ,  $SE=0.018$ ). This  
544 means that the IIAB model captures the data best when setting its parameters in such a way that  
545 it essentially becomes a trial-by-trial estimation model and accounts for stepwise behaviour  
546 through the response threshold.  
547  
548

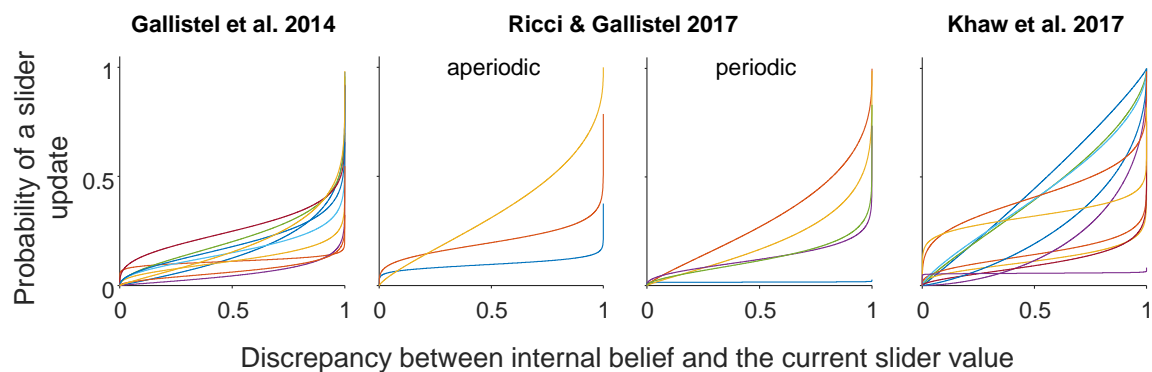

**Figure 8** | Maximum-likelihood estimates of the variable response thresholds in the delta-rule model (different colors indicate different participants). The threshold is visualised as the cumulative probability distribution of making a slider update as a function of the size of the discrepancy between the internally held belief about the tracked probability and the current slider value. For most participants, the probability of performing a slider update increases with this discrepancy.

549  
550  
551

## 552 **Two-kernel delta-rule model**

553 Under conditions where there are large and infrequent changes, as in much of the  
554 experiment data considered in this study, the standard version of the delta-rule faces a problem.  
555 If a lot of weight is put on the most recent history (by having a high learning rate), the model  
556 will quickly catch on to changes but exhibit excessive volatility during the long periods where  
557 the true probability is unchanged. If, on the other hand, recency is given only a little weight,  
558 the model will avoid excessive volatility but be slow to catch on to sudden changes. As a  
559 potential solution, Gallistel et al. (2014) considered a two-kernel variant that keeps track of two  
560 running averages with different learning rates. The model switches between these two running  
561 averages, allowing it to keep up with sudden changes while avoiding excessive volatility.  
562 Gallistel et al. (2014) rejected this model because it was allegedly unable to produce unimodal  
563 step height and step width distributions, which is not the case when we model it with a beta

564 response threshold. We find that this version outperforms the regular delta-rule by  $38.8 \pm 6.1$   
565 log-likelihood points (see Supplemental Materials for implementation details). Having the  
566 flexibility to weight evidence differently at different times thus seems important.

567

### 568 **An approximately Bayesian delta-rule model**

569 Nassar et al. (2010) suggested a delta-rule variant inspired by the same Bayesian change point  
570 detection model (Adams & MacKay, 2007) as the IIAB model. Their “approximately Bayesian  
571 delta-rule model” explicitly considers two hypotheses after each new observation: either there  
572 has been a change in the true, covert probability or there has not. Unlike the IIAB model, it  
573 performs no discrete hypothesis testing but instead balances the relative evidence of these two  
574 possibilities trial-by-trial. This balancing can be rewritten (see Nassar et al., 2010, and  
575 Supplemental Materials for details) as a delta-rule with an adaptive learning rate.

576 We find that this model outperforms the IIAB model by  $70 \pm 25$  log likelihood points,  
577 but performs worse than the regular delta-rule model by  $55 \pm 20$  log-likelihood points. Nassar  
578 et al. (2010) also suggested a non-normative variant that allows underweighting of likelihoods  
579 by raising them to a power. When the power is equal to 0, this model reduces to the regular  
580 delta-rule model for all but the first few trials (and can thus not perform much worse than that  
581 model). This non-normative variant performs better than the regular delta-rule model, by  $31 \pm$   
582  $11$  log-likelihood points, but often underweights likelihoods heavily (Figure S6 in  
583 Supplemental Materials). In sum, this version of an adaptive learning rate does seem to improve  
584 on the regular delta-rule model if it is allowed to deviate from normativity.

585

### 586 **Slider updating consistency**

587 Why do people regularly make a slider update that is inconsistent with their last  
588 observation, such as decreasing their estimate of the probability of red outcomes after observing  
589 a red outcome? In a basic delta-rule model, response updates are always consistent with the  
590 most recent observation: observing a red ring increases the estimate of the probability of  
591 observing a red ring and observing a ring of the other colour decreases it. In the IIAB model,  
592 the “second thoughts” mechanism might on rare occasions cause inconsistent updating ( $4.50 \pm$   
593  $0.65\%$  of all slider updates under the maximum likelihood parameter values).

594 One potentially important source of inconsistent updating is the response threshold. For  
595 example, a momentarily high threshold might suppress a downwards adjustment of the slider  
596 but it will never suppress a downwards adjustment of the internal belief. If the threshold on the  
597 next trial happens to be lower, and the new observation increases the internal belief by less than

598 it was decreased on the previous trial, the reported estimate will be adjusted downwards – which  
599 would be inconsistent with the last observation. Indeed, the maximum-likelihood fits of the  
600 IIAB model and delta-rule model with a response threshold predict that  $31.8 \pm 0.8\%$  and  
601  $22.1 \pm 0.9\%$  of the slider updates, respectively, are inconsistent. Hence, the IIAB model slightly  
602 overestimates the empirical proportion of  $23.6 \pm 1.6\%$  ( $BF_{10} = 305$ ; two-tailed paired-samples  $t$ -  
603 test), while the predictions of the delta-rule model are consistent with the data ( $BF_{10} = 0.36$ ).

604

## 605 **DISCUSSION**

606 Previous studies where participants track a non-stationary Bernoulli distribution (Gallistel  
607 et al., 2014; Khaw et al., 2017; Ricci & Gallistel, 2017; Robinson, 1964) have consistently  
608 observed stepwise, “staircase-like” response patterns. It has been claimed that this pattern and  
609 related phenomena are inconsistent with trial-by-trial learning models and are instead indicative  
610 of discrete, stepwise learning through hypothesis testing (Gallistel et al., 2014; Ricci &  
611 Gallistel, 2017). This claim constitutes a serious challenge to the neuropsychological literature  
612 which connects trial-by-trial learning of probabilities (Nassar et al., 2012, 2010; Norton et al.,  
613 2019; Wilson et al., 2013, 2018), encoding of prediction errors in the anterior cingulate cortex  
614 (Behrens et al., 2007; Rushworth & Behrens, 2008; Silvetti et al., 2013) and the experience of  
615 surprise (Lavín et al., 2014; Preuschoff et al., 2011).

616 In the present paper, we argue that the rejection of trial-by-trial learning in human  
617 probability estimation was premature because it was based on an incomplete investigation of  
618 the predictions made by delta-rule models: parameter space was explored manually and no  
619 model fitting was performed. To reassess the earlier drawn conclusions, we reanalysed data  
620 from three previous experiments (Gallistel et al., 2014; Khaw et al., 2017; Ricci & Gallistel,  
621 2017) using rigorous model fitting and model comparison methods. Our findings demonstrate  
622 that a dual process of two broadly supported computational theories – the delta-rule for online  
623 learning of a latent variable and the drift-diffusion model for making categorical decisions –  
624 makes predictions that are qualitatively highly consistent with the observed phenomena. We  
625 thereby account for them by reference to the assumptions of two of the most well-established  
626 theories of learning and evidence accumulation rather than by introducing new assumptions  
627 that are specifically tailored to account for said phenomena. Moreover, quantitative model  
628 comparison showed that the delta-rule model actually accounts *better* for the data than the  
629 proposed IIAB model in which learning proceeds through hypothesis testing. These conclusions  
630 hold across all tested data sets and are robust to changes in the modelling assumptions about  
631 the shape of the response threshold distribution, the assumed lapse rate, and the presence of

632 response noise. In the (paraphrased) words of Mark Twain (White, 1897), we conclude that the  
633 report of the death of trial-by-trial estimation models was an exaggeration. We will immediately  
634 add, however, that we do not take this to imply the death of hypothesis testing models.  
635 Ultimately, we would expect – as is true in most areas of cognitive science – the mind to be  
636 able to draw on several different cognitive processes to estimate a property so fundamental to  
637 adaptation as probability. Our central claim here is that two of those might be delta-rule learning  
638 and drift diffusion decision making.

639

#### 640 **Theoretical importance and implications of a variable response threshold**

641 Adding a variable response threshold greatly improves model fits. One reason is that  
642 participants make inconsistent updates which are incompatible with the original models, why  
643 their likelihoods are punished each time an inconsistent update occurs. The variable threshold  
644 allows the models to account for this. The response threshold thus does not merely “soak up  
645 noise” but is required by both the IIAB and delta-rule model to explain inconsistent updating  
646 and other empirical phenomena (Table 1). We therefore emphasise that a variable response  
647 threshold does not represent a “nuisance term”, akin to adding an error term to a regression, but  
648 constitutes a theoretical proposition which is tentatively supported by our results.

649 Evaluation of the fitted response thresholds revealed that many distributions were so  
650 broad that the choice of whether or not to update on any given trial becomes partly stimulus-  
651 independent. Completely stimulus-independent thresholds have elsewhere (Biele et al., 2009;  
652 Gonzalez & Dutt, 2011) been termed “inertia”. For two of the 29 participants, a coin-flip  
653 mechanism did indeed provide a better quantitative fit than the response threshold mechanism.  
654 However, for the vast majority of participants it did not, which suggests that updating is at least  
655 in part driven by stimulus-dependent factors (as also concluded by Khaw et al., 2017). For other  
656 participants, we obtained threshold distributions such that the probability of updating the  
657 response increased with the discrepancy between the current response and the internal estimate.  
658 Updates were disproportionately unlikely under very small discrepancies and  
659 disproportionately likely under very large discrepancies. We interpret this as a *resistance* to  
660 updating, as opposed to a suppressive *threshold* – the term we have hitherto used. Participants  
661 are reluctant to update (perhaps due to the motor cost) but balance this against their wish to  
662 respond correctly. They care about not being *very* wrong, but not so much about being *exactly*  
663 right. In economics, the idea that learning can be influenced by a trade-off between the costs of  
664 updating and the gains from a more accurate belief has been formalised in the “rational  
665 inattention” literature (Sims, 2003). The stepwise response pattern in the present Bernoulli

666 distribution task has been taken to support this idea (Khaw et al., 2017). The reluctance  
667 interpretation of our threshold distributions stated above is different to rational inattention in  
668 that it supposes that the overt *response*, and not the covert *belief*, is affected by the trade-off.  
669 Our modelling here does not answer which version is correct and we do not hold our findings  
670 against rational inattention as a framework. We merely raise this point to caution against too  
671 high “blanket” confidence in belief level interpretations, which might be appropriate for some  
672 tasks but not for others.

673 Inertia and resistance (or rational inattention) are, seemingly, two distinct theoretical  
674 propositions as to how the mind times response updates. It may be that there is true  
675 heterogeneity in what mechanisms are used or that there exists a single mechanism which can  
676 express itself in two (ostensibly) different ways. Regardless of how internal estimates are  
677 updated, the process which mediates their expression as overt behaviour is scientifically  
678 interesting in itself and deserves further attention.

679

### 680 **Observation weighting is intrinsic to the theories**

681 We equalised the delta-rule model and the IIAB model on the assumption of a variable  
682 response threshold to show that this, although important, is not what drives the conclusions.  
683 Another difference is that the delta-rule model effectively performs *unequal weighting* of *all*  
684 observations while the IIAB model performs *equal weighting* of a *substring* of observations  
685 (those that occurred since the last or second to last change point). The weighting schemes are  
686 defining features of the theories the models embody. The IIAB model implements the theory  
687 that “the perception of Bernoulli probability is a by-product of the real-time construction of a  
688 compact encoding of the evolving sequence by means of change points” (Gallistel et al., 2014).  
689 Under unequal weighting of observations, the model contradicts this theory – the percept is no  
690 longer deduced from the change points. Associative theories instead suppose that the percept is  
691 no by-product but *learned in itself* by gradual adaptation. The delta-rule model has no  
692 conception of change points and can therefore not use them to define the relevant observations.  
693 The way that observations are weighted thus cannot be held constant across models; instead, it  
694 is an integral and defining feature of the mechanisms that we have sought to contrast.

695

### 696 **Alternative models**

697 We also found that a delta-rule which simultaneously estimates two kernels  
698 (Supplemental Materials) performs better than the regular, one-kernel delta-rule. Taken  
699 literally, this model continuously entertains two beliefs and selects one to report on each trial.



700 However, studies have indicated that learning rates in similar tasks are not fixed but adapted as  
701 a function of the prediction error modulated by the estimated volatility (Behrens et al., 2007;  
702 McGuire et al., 2014) or possibly other aspects of the choice environment (Lee et al., 2020).  
703 With this in mind, one could view the two-kernel model as an analogue for a single kernel  
704 model with an adaptive learning rate. We are therefore reluctant to interpret our results as  
705 evidence that people actually simultaneously hold dual beliefs about a single probability. Future  
706 studies might want to pool a larger number of datasets (from non-Bernoulli distribution tasks  
707 too) and compare various adaptive learning rate models to multi-kernel models. A multi-kernel  
708 interpretation also suggests that people should be able to report several earnest estimates at any  
709 one point, which should be possible to observe in an experiment.

710 Despite the supposed importance of an adaptive learning rate, an approximately Bayesian  
711 delta-rule model from the neuropsychological literature (Nassar et al., 2010) performs better  
712 than the hypothesis testing model but worse than the regular delta-rule. Allowing it to  
713 underweight likelihoods helps, in line with a previous observation (Nassar et al., 2010).  
714 However, with this change the model's original theoretical claim (that people are approximate  
715 Bayesians who balance two hypotheses trial-by-trial) becomes less distinct from the more  
716 general notion of the learning rate being inconstant. Our tentative interpretation is that the  
717 common problem of the (normative) Bayesian delta-rule and the IIAB is not that they adapt  
718 observation weights (which is supported by other evidence, see Behrens et al., 2007; Krugel et  
719 al., 2009) but could be that they do this by considering a limited number of discrete hypotheses.

720 Costello and Watts (2014, 2016, 2018) have suggested that a range of results from various  
721 probability judgement and decision tasks, including the present paradigm, could arise from  
722 normatively correct judgements being perturbed by constant memory noise. They simulated a  
723 hypothesis testing model (Costello & Watts, 2018) with the same two stages/three hypotheses  
724 structure as the IIAB. They argue that, if there is constant memory noise, updates from re-  
725 estimation will be biased towards 0.5 and updates from acceptance of a new hypothesis will be  
726 biased towards the extremes. These effects should cancel out, making the estimates accurate on  
727 average (phenomenon 4, Table 1). If estimates are actually made trial-by-trial, and hypothesis  
728 testing is a separate drift-diffusion process, Costello and Watts's (2018) framework predicts a  
729 constant bias towards 0.5, which seems inconsistent with the available data.

730

### 731 **Unexplained phenomena**

732 Phenomena 10 and 11 (Table 1) cannot be explained by neither the IIAB nor the delta-rule  
733 model as implemented here. However, both models could in principle be extended to do so.



734 Gallistel et al. (2014) noted that participants' frequency of change point reports on  
735 average decreased per session (phenomenon 10). They concluded that the IIAB cannot explain  
736 this under the regular priors used to explain the other qualitative phenomena, and that they had  
737 to substitute special priors tailored to this summary statistic. It is, however, easy to imagine a  
738 process where the threshold in the troubleshooting stage,  $T_2$ , is not fixed but adapted over time.  
739 This would result in a changing change point detection frequency. Analogously, the drift-  
740 diffusion literature explains this kind of effect as decision bound separation being adapted  
741 through learning (Liu & Watanabe, 2012; Zhang & Rowe, 2014).

742 In Ricci and Gallistel (2017), some participants were able to correctly report having  
743 drawn from a sinusoidal during the debriefing (phenomenon 11). A central theoretical  
744 proposition of the IIAB (see pp. 106, Gallistel et al., 2014) is that people do not perceive  
745 probabilities per se but “deduce” them from a (sparse) memory of change points. To generate  
746 a declarative belief of a continuous functional form from a discrete set of memories, it would  
747 require some function learning mechanism (e.g., Brehmer, 1974) which interpolates between  
748 the “datapoints”. For the delta-rule model, we need the mechanism to be recursive. There exist  
749 several such function learning models, some of which are specifically adapted to non-stationary  
750 environments (Speekenbrink & Shanks, 2010) and some of which use a version of delta-rule  
751 learning (DeLosh et al., 1997). The perhaps most famous of the latter is the EXAM model  
752 (Mcdaniel & Busemeyer, 2005).

753 In sum, we do not view phenomena 10 and 11 as evidence against either model but  
754 rather as avenues of future research. Investigating phenomenon 10 involves opening a black  
755 box by trying to establish a structured explanation of aspects which we here model as free  
756 parameters. Investigating phenomenon 11 would involve attaching a third process of function  
757 learning to what we suggest could be a dual process of delta-rule online learning and drift  
758 diffusion decision making (in line with the “Linnaean” approach to cognition; Millroth et al.,  
759 2021).

760

### 761 **Limitations of modelling**

762 The trial-by-trial learning models tested here are recursive: they update a compact  
763 knowledge state and do not require any sequence memory. However, any recursive function  
764 can be reformulated as an iterative function (Church, 1936b, 1936a; Turing, 1937) which  
765 repeatedly generates a new knowledge state from a sequence memory. Hence, to what extent  
766 people retain the sequences they have observed is ultimately not a question that can be answered  
767 by model comparison alone. We have demonstrated that a recursive, compact knowledge state

768 model is *possible*, which it previously was thought not to be, but future studies should perform  
769 falsification tests (Popper, 1968) through experimental manipulation.

770

### 771 **Concluding remarks**

772 We have demonstrated that it was premature for the previous literature to rule out trial-by-  
773 trial learning models of probability perception. In the spirit of cumulative science (Walter  
774 Mischel, 2009), the raw data and observed phenomena can be better explained by a dual process  
775 of delta-rule online learning and drift-diffusion evidence accumulation. That being said, this  
776 previous research has highlighted that a complete theory of probability perception must account  
777 for hypotheses about the generative process and how these affect our online estimates. Outside  
778 the laboratory, probabilities are learnt from experiences in their context. It seems likely that  
779 external, higher-level beliefs about this context – about volatility, sequentiality and trends in  
780 the generative process – can influence our online beliefs.

781

### 782 **CREDIT AUTHOR STATEMENT**

783 **Mattias Forsgren:** Conceptualization, Methodology, Validation, Formal Analysis,  
784 Investigation, Writing – Original Draft, Writing – Reviewing & Editing. **Peter Juslin:**  
785 Conceptualization, Methodology, Formal Analysis, Writing – Original Draft, Writing –  
786 Reviewing & Editing, Supervision, Project Administration, Funding Acquisition. **Ronald van**  
787 **den Berg:** Conceptualization, Methodology, Software, Validation, Formal Analysis, Writing –  
788 Original Draft, Writing – Reviewing & Editing, Visualization, Supervision, Project  
789 Administration, Funding Acquisition.

790

### 791 **REFERENCES**

- 792 Adams, R. P., & MacKay, D. J. C. (2007). *Bayesian Online Changepoint Detection*.  
793 Akaike, H. (1974). A new look at the statistical model identification. *IEEE Transactions on*  
794 *Automatic Control*, 19(6), 716–723. <https://doi.org/10.1109/TAC.1974.1100705>  
795 Ashby, F. G., & Valentin, V. V. (2017). Multiple systems of perceptual category learning:  
796 Theory and cognitive tests. In *Handbook of categorization in cognitive science, 2nd ed.*  
797 (pp. 157–188). Elsevier Academic Press. [https://doi.org/10.1016/B978-0-08-101107-](https://doi.org/10.1016/B978-0-08-101107-2.00007-5)  
798 [2.00007-5](https://doi.org/10.1016/B978-0-08-101107-2.00007-5)  
799 Barbey, A. K., & Sloman, S. A. (2007). Base-rate respect: From ecological rationality to dual  
800 processes. *Behavioral and Brain Sciences*. <https://doi.org/10.1017/S0140525X07001653>  
801 Behrens, T. E. J., Woolrich, M. W., Walton, M. E., & Rushworth, M. F. S. (2007). Learning

- 802 the value of information in an uncertain world. *Nature Neuroscience*.
- 803 <https://doi.org/10.1038/nn1954>
- 804 Biele, G., Erev, I., & Ert, E. (2009). Learning, risk attitude and hot stoves in restless bandit  
805 problems. *Journal of Mathematical Psychology*, 53(3), 155–167.
- 806 <https://doi.org/10.1016/j.jmp.2008.05.006>
- 807 Bogacz, R., Brown, E., Moehlis, J., Holmes, P., & Cohen, J. D. (2006). The physics of  
808 optimal decision making: A formal analysis of models of performance in two-alternative  
809 forced-choice tasks. *Psychological Review*, 113(4), 700–765.
- 810 <https://doi.org/10.1037/0033-295X.113.4.700>
- 811 Brehmer, B. (1974). Hypotheses about relations between scaled variables in the learning of  
812 probabilistic inference tasks. *Organizational Behavior and Human Performance*.
- 813 [https://doi.org/10.1016/0030-5073\(74\)90002-6](https://doi.org/10.1016/0030-5073(74)90002-6)
- 814 Brehmer, B. (1980). In one word: Not from experience. *Acta Psychologica*.
- 815 [https://doi.org/10.1016/0001-6918\(80\)90034-7](https://doi.org/10.1016/0001-6918(80)90034-7)
- 816 Bruner, J. S., Goodnow, J. J., & Austin, G. A. (1956). A study of thinking. In *A study of*  
817 *thinking*. John Wiley and Sons.
- 818 Bussemeyer, J. R., & Myung, I. J. (1988). A New Method for Investigating Prototype  
819 Learning. *Journal of Experimental Psychology: Learning, Memory, and Cognition*.
- 820 <https://doi.org/10.1037/0278-7393.14.1.3>
- 821 Church, A. (1936a). A note on the Entscheidungsproblem. *Journal of Symbolic Logic*.
- 822 <https://doi.org/10.2307/2269326>
- 823 Church, A. (1936b). An Unsolvability Problem of Elementary Number Theory. *American*  
824 *Journal of Mathematics*. <https://doi.org/10.2307/2371045>
- 825 Costello, F., & Watts, P. (2014). Surprisingly rational: Probability theory plus noise explains  
826 biases in judgment. *Psychological Review*. <https://doi.org/10.1037/a0037010>
- 827 Costello, F., & Watts, P. (2016). People’s conditional probability judgments follow  
828 probability theory (plus noise). *Cognitive Psychology*, 89, 106–133.
- 829 <https://doi.org/10.1016/j.cogpsych.2016.06.006>
- 830 Costello, F., & Watts, P. (2018). Probability Theory Plus Noise: Descriptive Estimation and  
831 Inferential Judgment. *Topics in Cognitive Science*, 10(1), 192–208.
- 832 <https://doi.org/10.1111/tops.12319>
- 833 DeLosh, E. L., Bussemeyer, J. R., & McDaniel, M. A. (1997). Extrapolation: The sine qua non  
834 for abstraction in function learning. *Journal of Experimental Psychology: Learning,*  
835 *Memory, and Cognition*, 23(4), 968–986. <https://doi.org/10.1037/0278-7393.23.4.968>

- 836 Ditterich, J. (2006). Stochastic models of decisions about motion direction: Behavior and  
837 physiology. *Neural Networks*, 19(8), 981–1012.  
838 <https://doi.org/10.1016/j.neunet.2006.05.042>
- 839 Drugowitsch, J., Wyart, V., Devauchelle, A.-D. D., & Koechlin, E. (2016). Computational  
840 Precision of Mental Inference as Critical Source of Human Choice Suboptimality.  
841 *Neuron*, 92(6), 1398–1411. <https://doi.org/10.1016/j.neuron.2016.11.005>
- 842 Edwards, W. (1961). Probability learning in 1000 trials. *Journal of Experimental Psychology*.  
843 <https://doi.org/10.1037/h0041970>
- 844 Estes, W. K. (1976). The cognitive side of probability learning. *Psychological Review*.  
845 <https://doi.org/10.1037/0033-295X.83.1.37>
- 846 Faisal, A. A., Selen, L. P. J., & Wolpert, D. M. (2008). Noise in the nervous system. *Nature*  
847 *Reviews. Neuroscience*, 9, 292–303. <https://doi.org/10.1038/nrn2258>
- 848 Fiedler, K. (2000). Beware of samples! A cognitive-ecological sampling approach to  
849 judgment biases. *Psychological Review*. <https://doi.org/10.1037/0033-295X.107.4.659>
- 850 Gallistel, C. R., Krishan, M., Liu, Y., Miller, R., & Latham, P. E. (2014). The perception of  
851 probability. *Psychological Review*. <https://doi.org/10.1037/a0035232>
- 852 Gigerenzer, G., & Hoffrage, U. (1995). How to improve Bayesian reasoning without  
853 instruction: Frequency formats. *Psychological Review*. <https://doi.org/10.1037/0033-295X.102.4.684>
- 855 Gonzalez, C., & Dutt, V. (2011). Instance-Based Learning: Integrating Sampling and  
856 Repeated Decisions From Experience. *Psychological Review*.  
857 <https://doi.org/10.1037/a0024558>
- 858 Hertwig, R., & Erev, I. (2009). The description-experience gap in risky choice. In *Trends in*  
859 *Cognitive Sciences*. <https://doi.org/10.1016/j.tics.2009.09.004>
- 860 Kahneman, D., & Frederick, S. (2005). A model of heuristic judgment. *The Cambridge*  
861 *Handbook of Thinking and Reasoning*.
- 862 Khaw, M. W., Stevens, L., & Woodford, M. (2017). Discrete adjustment to a changing  
863 environment: Experimental evidence. *Journal of Monetary Economics*.  
864 <https://doi.org/10.1016/j.jmoneco.2017.09.001>
- 865 Klayman, J., & Ha, Y. W. (1987). Confirmation, Disconfirmation, and Information in  
866 Hypothesis Testing. *Psychological Review*. <https://doi.org/10.1037/0033-295X.94.2.211>
- 867 Krugel, L. K., Biele, G., Mohr, P. N. C., Li, S. C., & Heekeren, H. R. (2009). Genetic  
868 variation in dopaminergic neuromodulation influences the ability to rapidly and flexibly  
869 adapt decisions. *Proceedings of the National Academy of Sciences of the United States of*

- 870 *America*. <https://doi.org/10.1073/pnas.09051911106>
- 871 Lavín, C., Martín, R. S., & Jubal, E. R. (2014). Pupil dilation signals uncertainty and surprise  
872 in a learning gambling task. *Frontiers in Behavioral Neuroscience*.  
873 <https://doi.org/10.3389/fnbeh.2013.00218>
- 874 Lee, S., Gold, J. I., & Kable, J. W. (2020). The human as delta-rule learner. *Decision*, 7(1),  
875 55–66. <https://doi.org/10.1037/dec0000112>
- 876 Liu, C. C., & Watanabe, T. (2012). Accounting for speed–accuracy tradeoff in perceptual  
877 learning. *Vision Research*, 61, 107–114. <https://doi.org/10.1016/j.visres.2011.09.007>
- 878 Mcdaniel, M. A., & Busemeyer, J. R. (2005). The conceptual basis of function learning and  
879 extrapolation: Comparison of rule-based and associative-based models. *Psychonomic*  
880 *Bulletin and Review*. <https://doi.org/10.3758/BF03196347>
- 881 McGuire, J. T., Nassar, M. R., Gold, J. I., & Kable, J. W. (2014). Functionally Dissociable  
882 Influences on Learning Rate in a Dynamic Environment. *Neuron*.  
883 <https://doi.org/10.1016/j.neuron.2014.10.013>
- 884 Millroth, P., Collsiöö, A., & Juslin, P. (2021). Cognitiva Speciebus: Towards a Linnaean  
885 Approach to Cognition. *Trends in Cognitive Sciences*, 25(3), 173–176.  
886 <https://doi.org/10.1016/j.tics.2020.12.005>
- 887 Nassar, M. R., Rumsey, K. M., Wilson, R. C., Parikh, K., Heasly, B., & Gold, J. I. (2012).  
888 Rational regulation of learning dynamics by pupil-linked arousal systems. *Nature*  
889 *Neuroscience*. <https://doi.org/10.1038/nn.3130>
- 890 Nassar, M. R., Wilson, R. C., Heasly, B., & Gold, J. I. (2010). An approximately Bayesian  
891 delta-rule model explains the dynamics of belief updating in a changing environment.  
892 *Journal of Neuroscience*. <https://doi.org/10.1523/JNEUROSCI.0822-10.2010>
- 893 Neal, R. M., & Dayan, P. (1997). Factor Analysis Using Delta-Rule Wake-Sleep Learning.  
894 *Neural Computation*. <https://doi.org/10.1162/neco.1997.9.8.1781>
- 895 Norton, E. H., Acerbi, L., Ma, W. J., & Landy, M. S. (2019). Human online adaptation to  
896 changes in prior probability. *PLoS Computational Biology*.  
897 <https://doi.org/10.1371/journal.pcbi.1006681>
- 898 Oaksford, M., & Chater, N. (1994). A Rational Analysis of the Selection Task as Optimal  
899 Data Selection. *Psychological Review*. <https://doi.org/10.1037/0033-295X.101.4.608>
- 900 PETERSON, C. R., & BEACH, L. R. (1967). MAN AS AN INTUITIVE STATISTICIAN.  
901 *Psychological Bulletin*. <https://doi.org/10.1037/h0024722>
- 902 Popper, K. (1968). *The Logic of Scientific Discovery* (2 rev. ed.). Hutchinson.
- 903 Preuschoff, K., 't Hart, B. M., & Einhäuser, W. (2011). Pupil dilation signals surprise:



- 904 Evidence for noradrenaline's role in decision making. *Frontiers in Neuroscience*.  
905 <https://doi.org/10.3389/fnins.2011.00115>
- 906 Ratcliff, R. (1978). A theory of memory retrieval. *Psychological Review*.  
907 <https://doi.org/10.1037/0033-295X.85.2.59>
- 908 Ratcliff, R., Smith, P. L., Brown, S. D., & McKoon, G. (2016). Diffusion Decision Model:  
909 Current Issues and History. *Trends in Cognitive Sciences*, 20(4), 260–281.  
910 <https://doi.org/10.1016/j.tics.2016.01.007>
- 911 Rescorla, R. A., & Wagner, A. R. (1972). A Theory of Pavlovian Conditioning: Variations in  
912 the Effectiveness of Reinforcement and Nonreinforcement BT - Classical conditioning II:  
913 current research and theory. In *Classical conditioning II: current research and theory*.
- 914 Resulaj, A., Kiani, R., Wolpert, D. M., & Shadlen, M. N. (2009). Changes of mind in  
915 decision-making. *Nature*. <https://doi.org/10.1038/nature08275>
- 916 Ricci, M., & Gallistel, R. (2017). Accurate step-hold tracking of smoothly varying periodic  
917 and aperiodic probability. *Attention, Perception, and Psychophysics*.  
918 <https://doi.org/10.3758/s13414-017-1310-0>
- 919 Robinson, G. H. (1964). Continuous Estimation Of A Time-Varying Probability. *Ergonomics*,  
920 7(1), 7–21. <https://doi.org/10.1080/00140136408930721>
- 921 Rushworth, M. F. S., & Behrens, T. E. J. (2008). Choice, uncertainty and value in prefrontal  
922 and cingulate cortex. In *Nature Neuroscience*. <https://doi.org/10.1038/nn2066>
- 923 Silvetti, M., Seurinck, R., & Verguts, T. (2013). Value and prediction error estimation  
924 account for volatility effects in ACC: A model-based fMRI study. *Cortex*.  
925 <https://doi.org/10.1016/j.cortex.2012.05.008>
- 926 Sims, C. A. (2003). Implications of rational inattention. *Journal of Monetary Economics*,  
927 50(3), 665–690. [https://doi.org/10.1016/S0304-3932\(03\)00029-1](https://doi.org/10.1016/S0304-3932(03)00029-1)
- 928 Speekenbrink, M., & Shanks, D. R. (2010). Learning in a changing environment. *Journal of*  
929 *Experimental Psychology: General*, 139(2), 266–298. <https://doi.org/10.1037/a0018620>
- 930 Turing, A. M. (1937). On computable numbers, with an application to the  
931 entscheidungsproblem. *Proceedings of the London Mathematical Society*.  
932 <https://doi.org/10.1112/plms/s2-42.1.230>
- 933 Tversky, A., & Kahneman, D. (1983). Extensional versus intuitive reasoning: The  
934 conjunction fallacy in probability judgment. *Psychological Review*.  
935 <https://doi.org/10.1037/0033-295X.90.4.293>
- 936 Tversky, A., & Kahneman, D. (1992). Advances in prospect theory: Cumulative  
937 representation of uncertainty. *Journal of Risk and Uncertainty*.

- 938 <https://doi.org/10.1007/BF00122574>
- 939 van den Berg, R., Anandalingam, K., Zylberberg, A., Kiani, R., Shadlen, M. N. M. N., &  
940 Wolpert, D. M. (2016). A common mechanism underlies changes of mind about  
941 decisions and confidence. *ELife*, 5(FEBRUARY2016).  
942 <https://doi.org/10.7554/eLife.12192>
- 943 Verguts, T., & Van Opstal, F. (2014). A delta-rule model of numerical and non-numerical  
944 order processing. *Journal of Experimental Psychology: Human Perception and*  
945 *Performance*. <https://doi.org/10.1037/a0035114>
- 946 Wagenmakers, E. J. (2009). Methodological and empirical developments for the Ratcliff  
947 diffusion model of response times and accuracy. *European Journal of Cognitive*  
948 *Psychology*, 21(5), 641–671. <https://doi.org/10.1080/09541440802205067>
- 949 Walter Mischel. (2009). Becoming a Cumulative Science. *APS Observer*, 22(1).
- 950 WASON, P. C., & JOHNSON-LAIRD, P. N. (1970). A CONFLICT BETWEEN  
951 SELECTING AND EVALUATING INFORMATION IN AN INFERENCE TASK.  
952 *British Journal of Psychology*. <https://doi.org/10.1111/j.2044-8295.1970.tb01270.x>
- 953 White, F. M. (1897, June). Mark Twain amused, humorist says he even heard on good  
954 authority that he was dead. *New York Journal and Advertiser*.
- 955 Widrow, B., & Hoff, M. E. (1960). Adaptive Switching Circuits. In *Technical report no.*  
956 *1553-1*.
- 957 Widrow, B., & Lehr, M. A. (1993). ARTIFICIAL NEURAL NETWORKS OF THE  
958 PERCEPTRON, MADALINE, AND BACKPROPAGATION FAMILY. In  
959 *Neurobionics*. <https://doi.org/10.1016/b978-0-444-89958-3.50013-9>
- 960 Wilson, R. C., Nassar, M. R., & Gold, J. I. (2013). A Mixture of Delta-Rules Approximation  
961 to Bayesian Inference in Change-Point Problems. *PLoS Computational Biology*.  
962 <https://doi.org/10.1371/journal.pcbi.1003150>
- 963 Wilson, R. C., Nassar, M. R., Tavoni, G., & Gold, J. I. (2018). Correction: A Mixture of  
964 Delta-Rules Approximation to Bayesian Inference in Change-Point Problems. *PLOS*  
965 *Computational Biology*. <https://doi.org/10.1371/journal.pcbi.1006210>
- 966 Zhang, J., & Rowe, J. B. (2014). Dissociable mechanisms of speed-accuracy tradeoff during  
967 visual perceptual learning are revealed by a hierarchical drift-diffusion model. *Frontiers*  
968 *in Neuroscience*, 8(7), 651–687. <https://doi.org/10.3389/fnins.2014.00069>
- 969
